# Supplementary material for: Convenient and efficient synthesis of disubstituted piperazine derivatives by catalyst-free, atom-economical and tricomponent domino reactions
Source: Royal Society of Chemistry journal article supplement (doi:10.1039/c4ra14811h), 2015-01-01

Supplementary information and chemical compound information 2

## Convenient and efficient synthesis of disubstituted piperazine derivatives by catalyst-free, atom-economical and tricomponent domino reactions

Hong-Ru Dong, Zi-Bao Chen, Rong-Shan Li, Heng-Shan Dong\* and Zhi-Xiang Xie \*

College of Chemistry and Chemical Engineering, State Key Laboratory of Applied Organic Chemistry, Institute of Organic Chemistry, Lanzhou University, Lanzhou, Gansu 730000, P, R  
China

[donghengshan@lzu.edu.cn](mailto:donghengshan@lzu.edu.cn); [xiezx@lzu.edu.cn](mailto:xiezx@lzu.edu.cn)

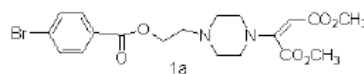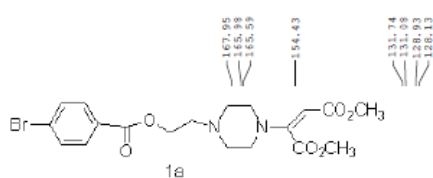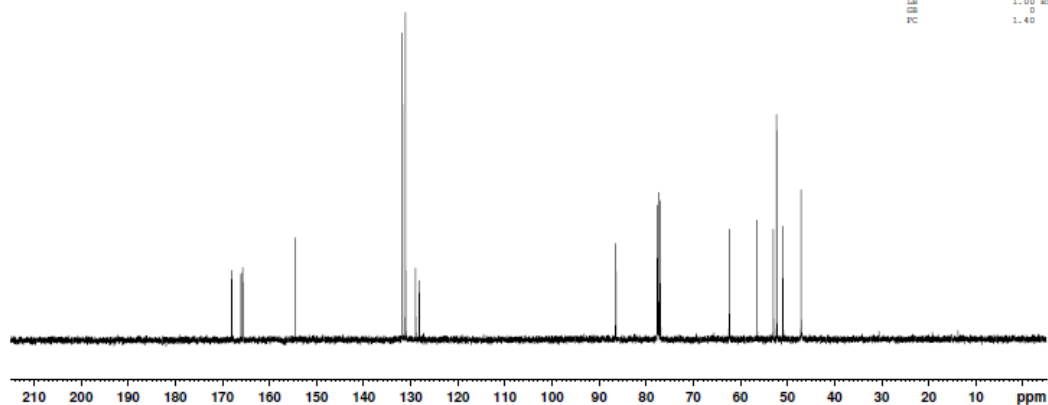

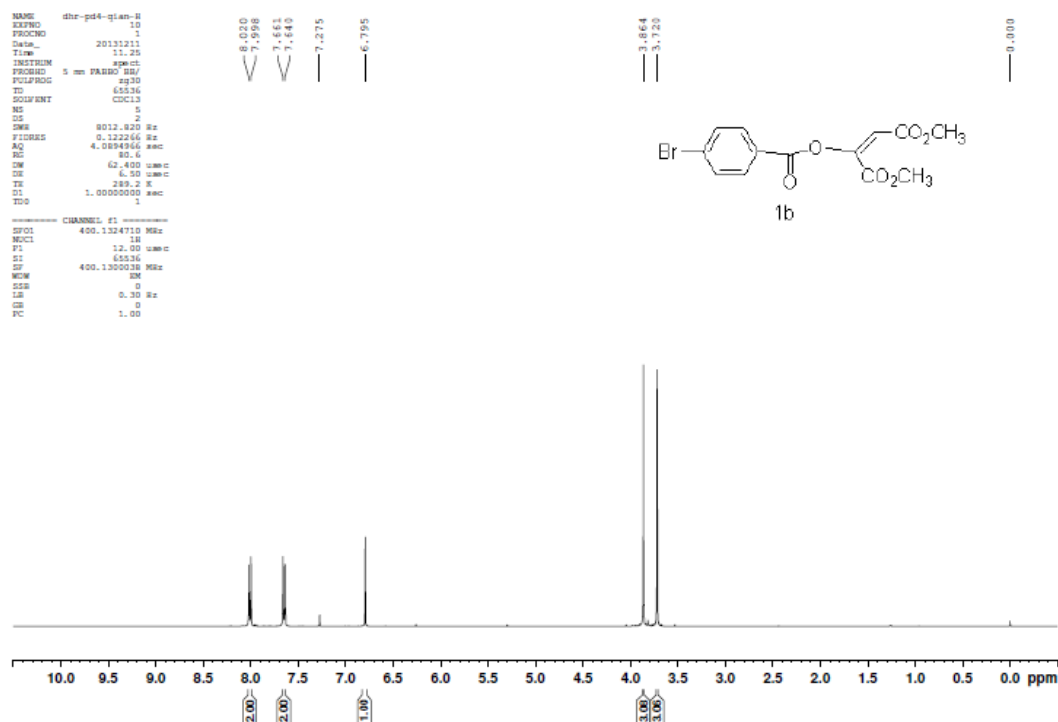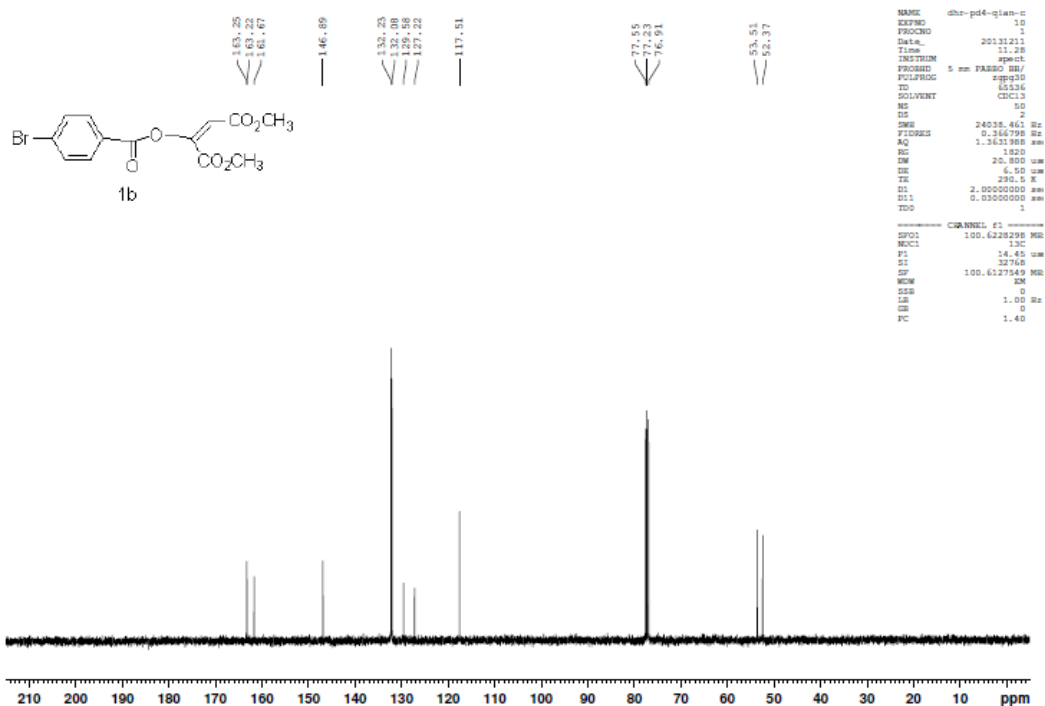

NAME chr-pd5-H2O131211  
 EXPNO 10  
 PROCNO 1  
 Date\_ 20131211  
 Time 11.16  
 INSTRUM spect  
 FREQHD 5 mm PABBO BB/ 400.05  
 PULPROG zgpg30  
 TD 65536  
 SFO 400.1224710 MHz  
 SOLVENT DMSO  
 NS 2  
 DS 2  
 SWH 8012.420 Hz  
 FIDRES 0.122266 Hz  
 AQ 4.089496 sec  
 RG 32.4  
 IN 62.400 usec  
 DE 6.50 usec  
 TE 300.2 K  
 D1 1.0000000 sec  
 TDO 1

===== CHANNEL f1 =====  
 NUC1 13C  
 P1 12.00 usec  
 PL 0.00 dB  
 F1 400.1224710 MHz  
 WDW EM  
 SSB 0  
 GB 0.30 Hz  
 LB 0  
 PC 1.00

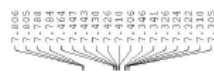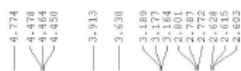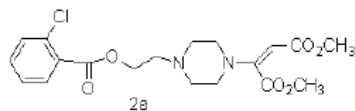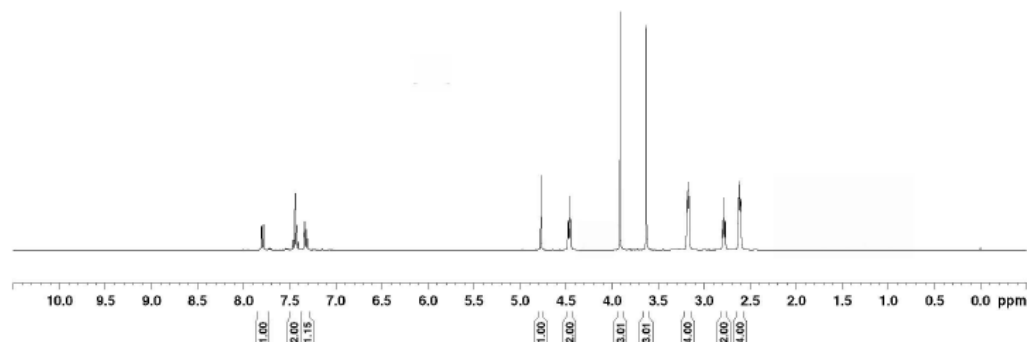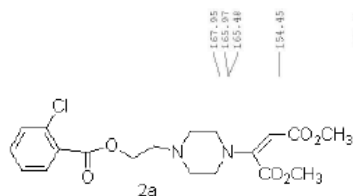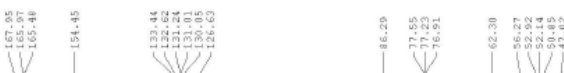

NAME chr-pd5-c201311  
 EXPNO 10  
 PROCNO 1  
 Date\_ 20131211  
 Time 11.20  
 INSTRUM spect  
 FREQHD 5 mm PABBO BB/ 400.05  
 PULPROG zgpg30  
 TD 65536  
 SFO 400.1224710 MHz  
 SOLVENT DMSO  
 NS 2  
 DS 2  
 SWH 8012.420 Hz  
 FIDRES 0.122266 Hz  
 AQ 4.089496 sec  
 RG 32.4  
 IN 62.400 usec  
 DE 6.50 usec  
 TE 300.2 K  
 D1 1.0000000 sec  
 TDO 1

===== CHANNEL f1 =====  
 NUC1 13C  
 P1 12.00 usec  
 PL 0.00 dB  
 F1 400.1224710 MHz  
 WDW EM  
 SSB 0  
 GB 0.30 Hz  
 LB 0  
 PC 1.00

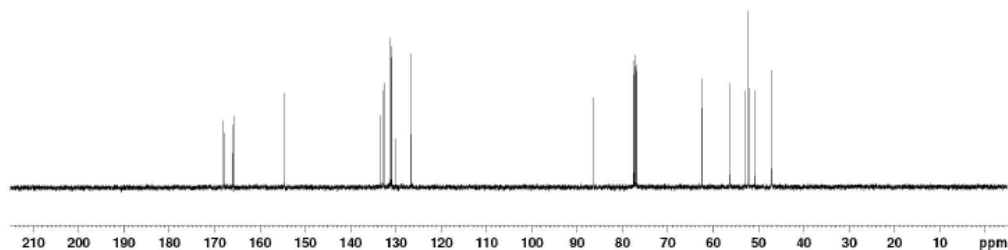

NAME dbr-pd5-qiao-R20131211  
 EXPNO 1  
 PROCNO 1  
 Date\_ 20131211  
 Time 11.33  
 INSTRUM spect  
 PROBRD 5 mm HADQ 600  
 PULPROG zgpg30  
 TO 450.34  
 SOLVENT CDCl3  
 NS 2  
 DS 2  
 SWH 6012.820 Hz  
 FIDRES 0.122444 Hz  
 AQ 4.0049464 sec  
 RG 51  
 CW 62.400 uumc  
 DE 6.50 uumc  
 TE 292.1 K  
 TL 1.0000000 sec  
 TD0

===== CHANNEL f1 =====  
 NUC1 400.1324718 MHz  
 P1 12.00 uumc  
 PL 0.00 dB  
 RF 400.1300000 MHz  
 NS 0  
 DS 0  
 SW 0.30 Hz  
 CH 0  
 PC 1.00

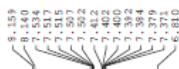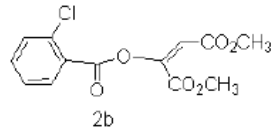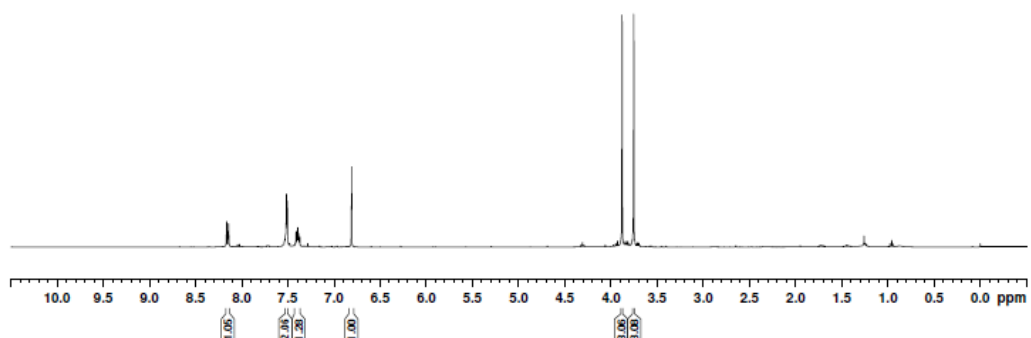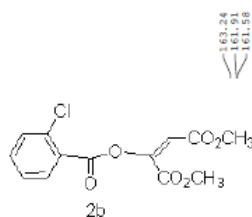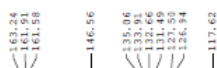

NAME dbr-pd5-qiao-c2013  
 EXPNO 1  
 PROCNO 1  
 Date\_ 20131211  
 Time 11.12  
 INSTRUM spect  
 PROBRD 5 mm HADQ 600  
 PULPROG zgpg30  
 TO 450.34  
 SOLVENT CDCl3  
 NS 2  
 DS 2  
 SWH 24038.461 Hz  
 FIDRES 0.344798 Hz  
 AQ 1.3631928 sec  
 RG 1820  
 CW 20.800 uumc  
 DE 6.50 uumc  
 TE 292.2 K  
 TL 0.0000000 sec  
 TD1 0.0000000 sec  
 TD0

===== CHANNEL f1 =====  
 NUC1 100.6228298 MHz  
 P1 14.40 uumc  
 PL 0.00 dB  
 RF 100.6127593 MHz  
 NS 0  
 DS 0  
 SW 1.00 Hz  
 CH 0  
 PC 1.00

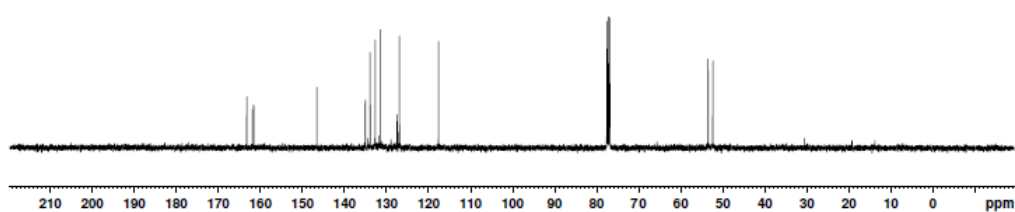

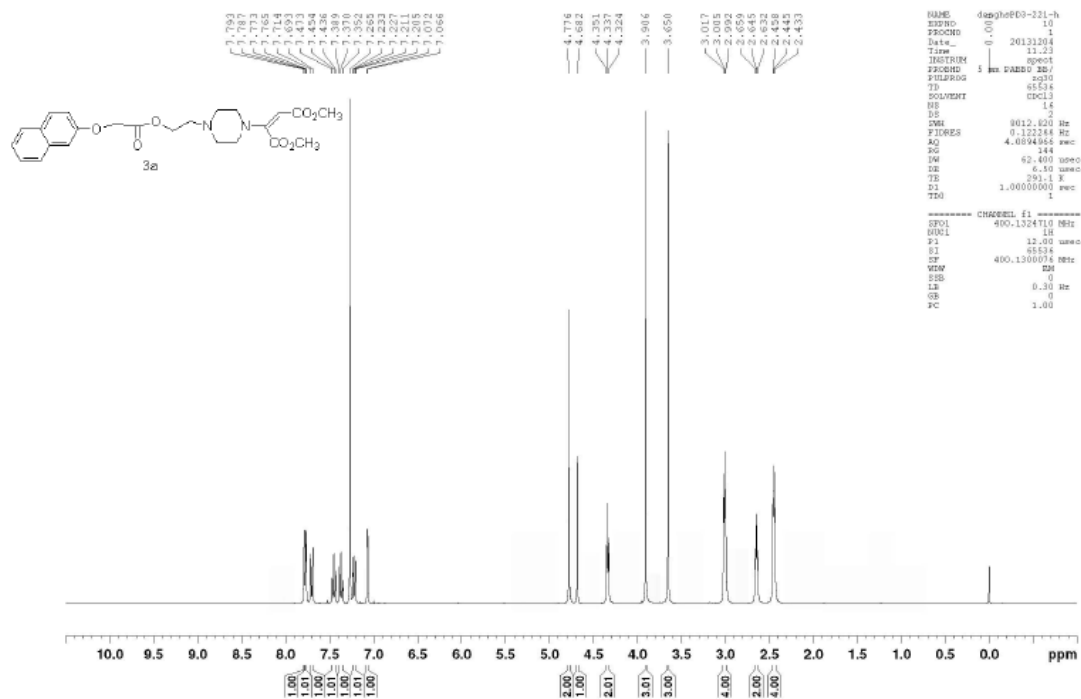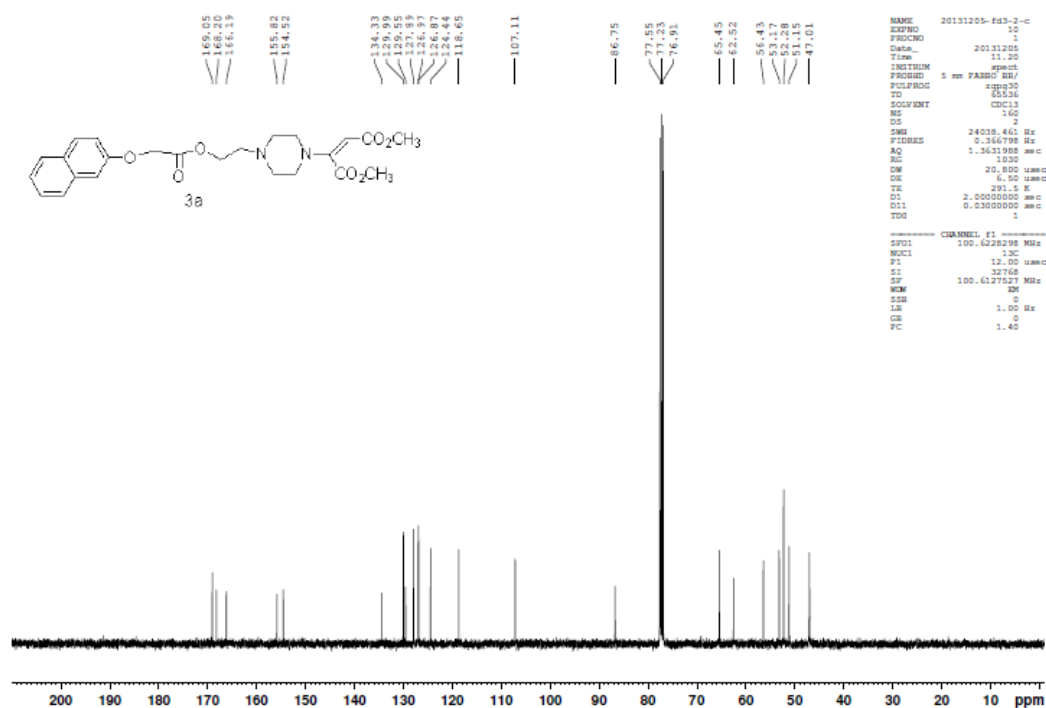

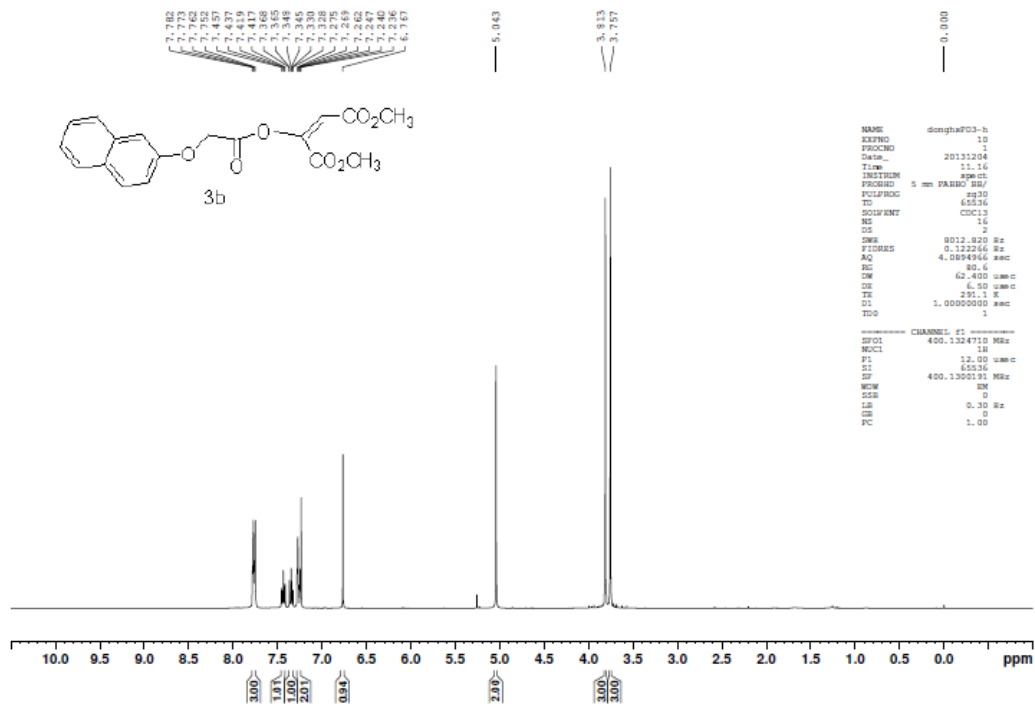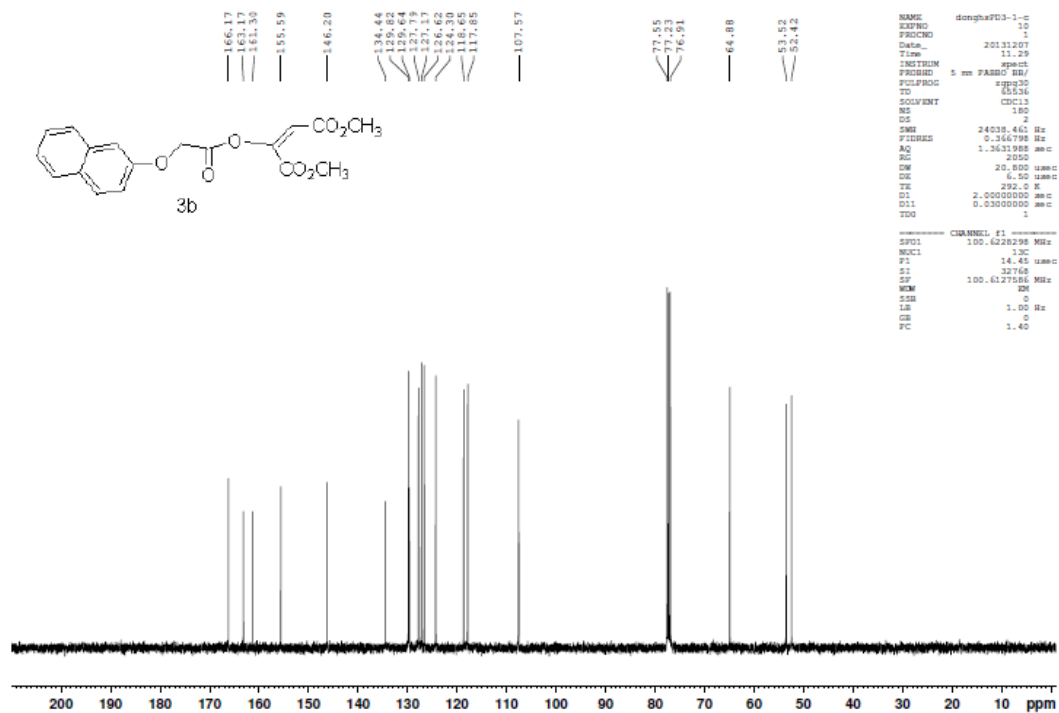

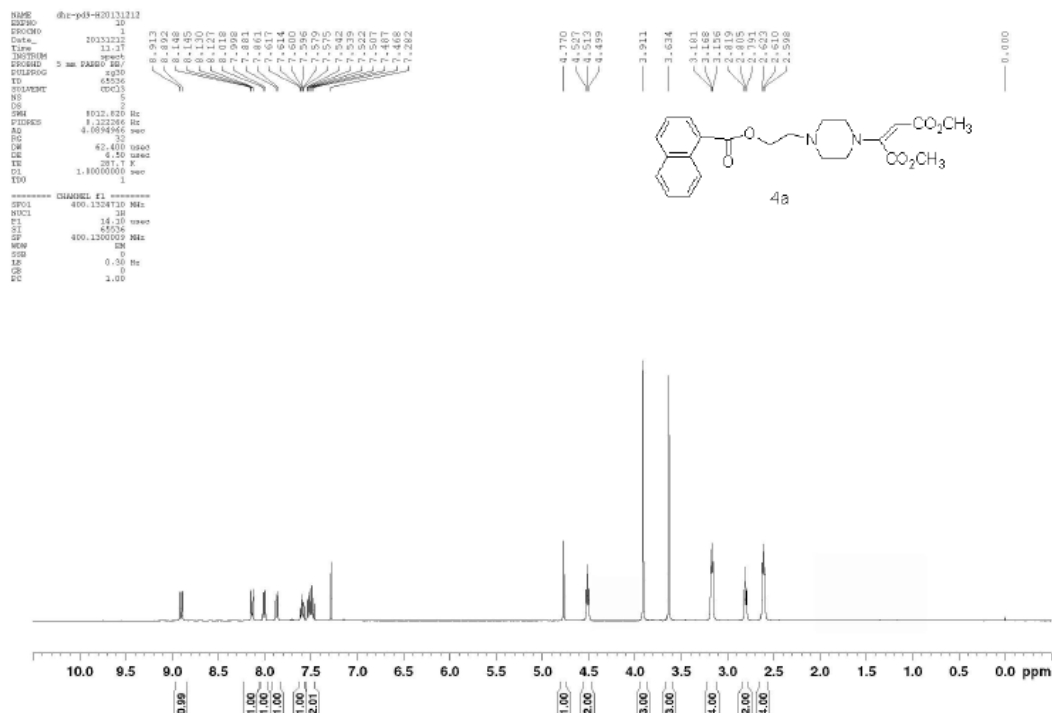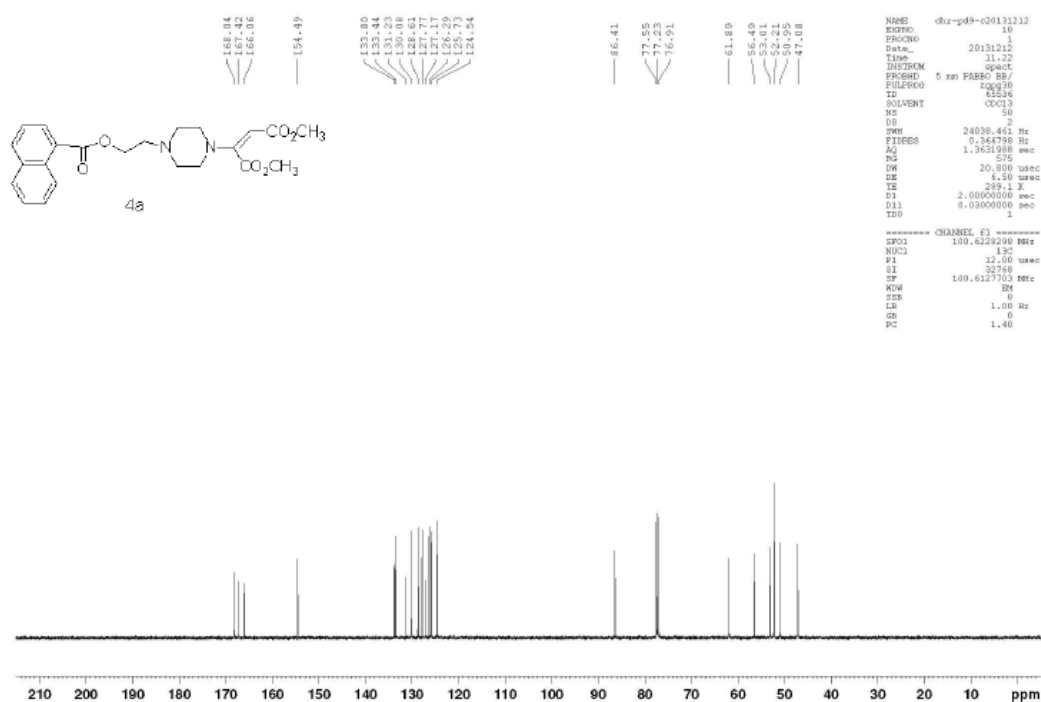



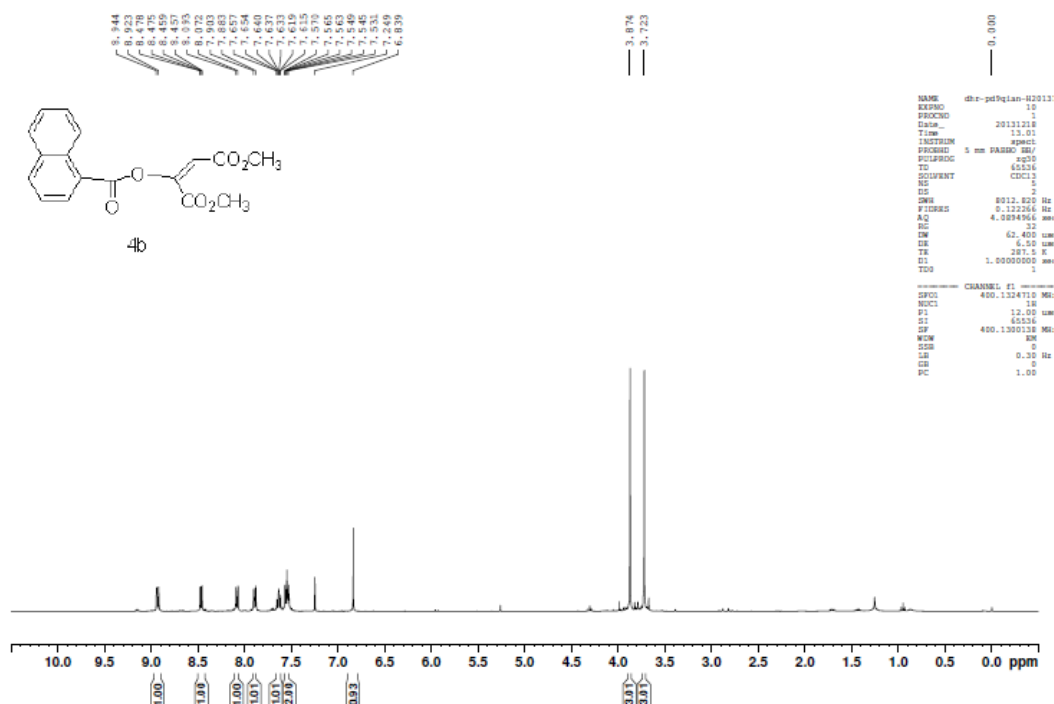

```

NAME      chr-pdqian-H2011
EXPNO     1
PROCNO    1
Date_     20111218
Time      13.01
INSTRUM    spect
PROBHD     5 mm PABBO BB/
PULPROG    zgpg30
TD         65536
SOLVENT    CDCl3
NS         1
DS         1
SWH         8012.820 Hz
FIDRES     0.122266 Hz
AQ         4.0894960 sec
RG         32
DE         62.400 um
CE         1.10 um
TR         2017.5 K
D1         1.00000000 sec
D11        1
TD0        1
===== CHANNEL f1 =====
NUC1       13C
P1         18
SFO1       400.1254710 MHz
F1         12.00
SI         65536
SF         400.1300110 MHz
WDW        EM
SSB        0
GB         0.30 Hz
PC         1.00

```

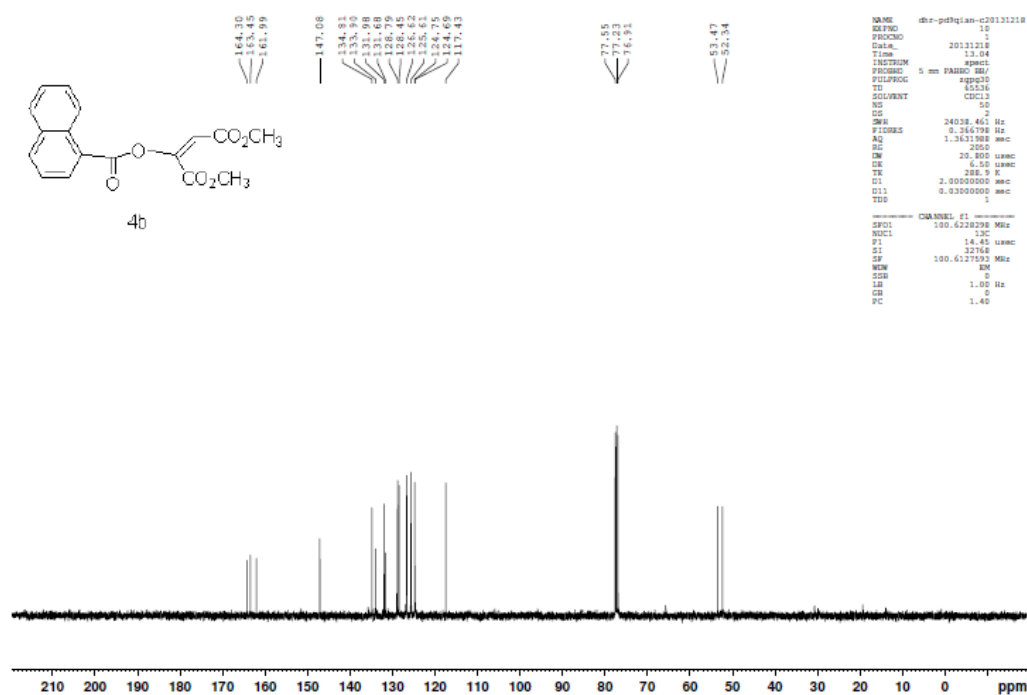

```

NAME      chr-pdqian-c20131218
EXPNO     1
PROCNO    1
Date_     20111218
Time      13.04
INSTRUM    spect
PROBHD     5 mm PABBO BB/
PULPROG    zgpg30
TD         65536
SOLVENT    CDCl3
NS         1
DS         1
SWH         24038.461 Hz
FIDRES     0.346796 Hz
AQ         1.3611188 sec
RG         2050
DE         20.800 um
CE         6.50 um
TR         288.0 K
D1         2.00000000 sec
D11        0.03000000 sec
TD0        1
===== CHANNEL f1 =====
NUC1       13C
P1         18
SFO1       100.6220290 MHz
F1         14.45
SI         22700
SF         100.6127593 MHz
WDW        EM
SSB        0
GB         1.00 Hz
PC         1.40

```

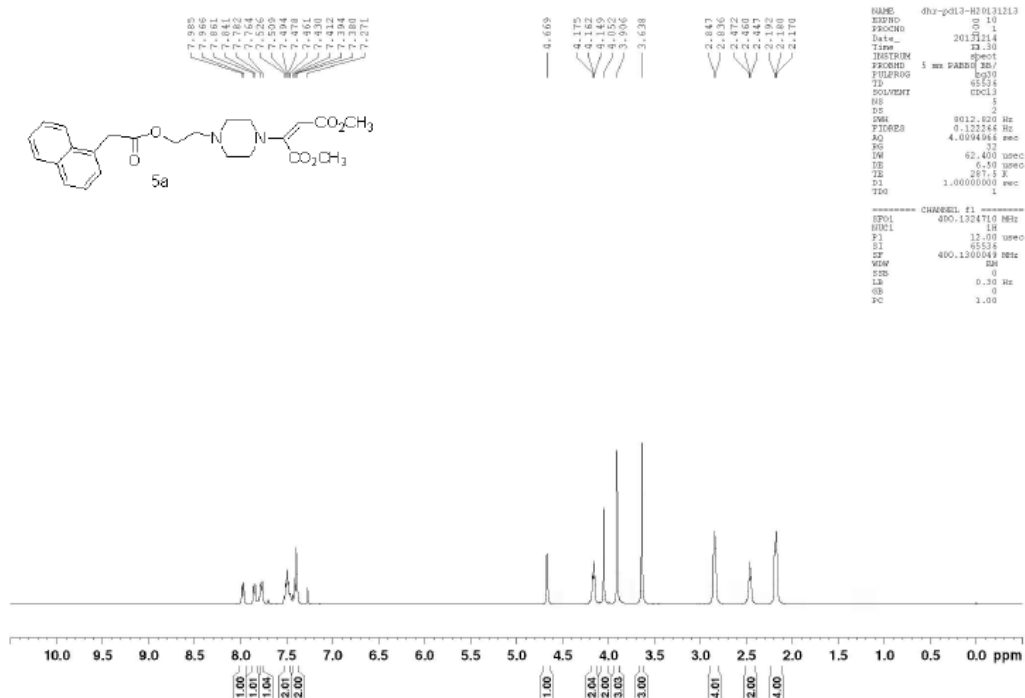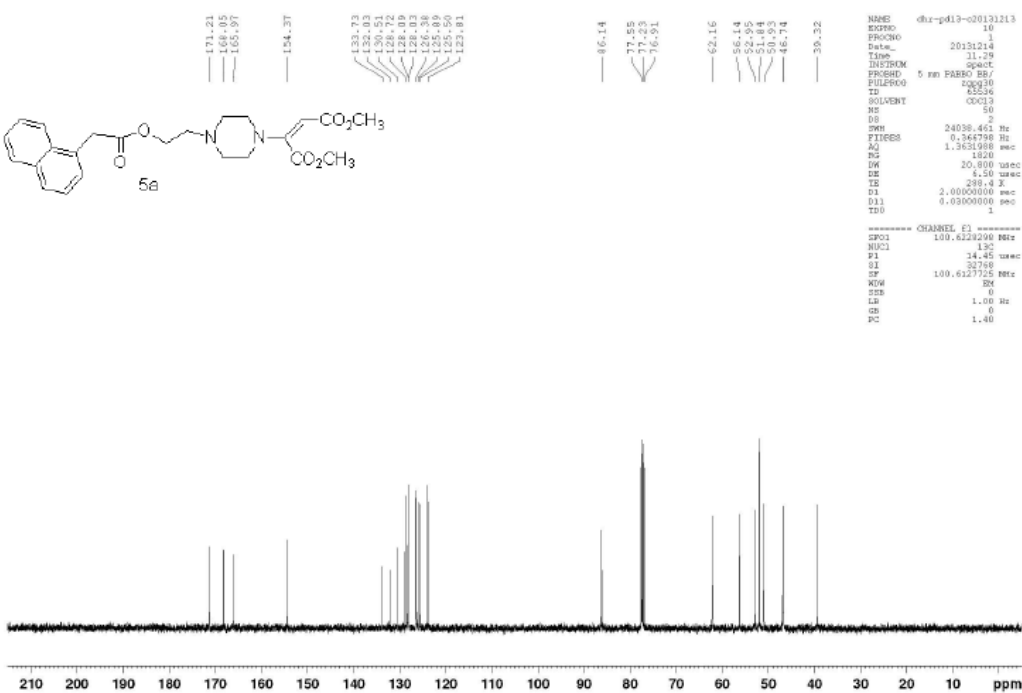

```

NAME      chr-pd31hou-#20131219
EXPNO     1
PROCNO    1
Date_     20131219
Time      11.10
INSTRUM    spect
PROBHD     5 mm PABBO BB/
PULPROG    zg30
TD         65536
SOLVENT    CDCl3
NS         5
DS         2
SWH         8012.820 Hz
FIDRES     0.122266 Hz
AQ         4.088496 sec
RG         32
DM         62.400 usec
DE         6.50 usec
TE         285.4 K
D1         3.0000000 sec
D11        1
D10        1

===== CHANNEL f1 =====
NUC1       13C
P1         14.10 usec
PT         65536
SE         400.1258826 MHz
SFO         100
SFB         100
LB         0.30 Hz
GB         0
PC         1.00

```

8.000  
 7.996  
 7.990  
 7.986  
 7.982  
 7.978  
 7.974  
 7.970  
 7.966  
 7.962  
 7.958  
 7.954  
 7.950  
 7.946  
 7.942  
 7.938  
 7.934  
 7.930  
 7.926  
 7.922  
 7.918  
 7.914  
 7.910  
 7.906  
 7.902  
 7.898  
 7.894  
 7.890  
 7.886  
 7.882  
 7.878  
 7.874  
 7.870  
 7.866  
 7.862  
 7.858  
 7.854  
 7.850  
 7.846  
 7.842  
 7.838  
 7.834  
 7.830  
 7.826  
 7.822  
 7.818  
 7.814  
 7.810  
 7.806  
 7.802  
 7.798  
 7.794  
 7.790  
 7.786  
 7.782  
 7.778  
 7.774  
 7.770  
 7.766  
 7.762  
 7.758  
 7.754  
 7.750  
 7.746  
 7.742  
 7.738  
 7.734  
 7.730  
 7.726  
 7.722  
 7.718  
 7.714  
 7.710  
 7.706  
 7.702  
 7.698  
 7.694  
 7.690  
 7.686  
 7.682  
 7.678  
 7.674  
 7.670  
 7.666  
 7.662  
 7.658  
 7.654  
 7.650  
 7.646  
 7.642  
 7.638  
 7.634  
 7.630  
 7.626  
 7.622  
 7.618  
 7.614  
 7.610  
 7.606  
 7.602  
 7.598  
 7.594  
 7.590  
 7.586  
 7.582  
 7.578  
 7.574  
 7.570  
 7.566  
 7.562  
 7.558  
 7.554  
 7.550  
 7.546  
 7.542  
 7.538  
 7.534  
 7.530  
 7.526  
 7.522  
 7.518  
 7.514  
 7.510  
 7.506  
 7.502  
 7.498  
 7.494  
 7.490  
 7.486  
 7.482  
 7.478  
 7.474  
 7.470  
 7.466  
 7.462  
 7.458  
 7.454  
 7.450  
 7.446  
 7.442  
 7.438  
 7.434  
 7.430  
 7.426  
 7.422  
 7.418  
 7.414  
 7.410  
 7.406  
 7.402  
 7.398  
 7.394  
 7.390  
 7.386  
 7.382  
 7.378  
 7.374  
 7.370  
 7.366  
 7.362  
 7.358  
 7.354  
 7.350  
 7.346  
 7.342  
 7.338  
 7.334  
 7.330  
 7.326  
 7.322  
 7.318  
 7.314  
 7.310  
 7.306  
 7.302  
 7.298  
 7.294  
 7.290  
 7.286  
 7.282  
 7.278  
 7.274  
 7.270  
 7.266  
 7.262  
 7.258  
 7.254  
 7.250  
 7.246  
 7.242  
 7.238  
 7.234  
 7.230  
 7.226  
 7.222  
 7.218  
 7.214  
 7.210  
 7.206  
 7.202  
 7.198  
 7.194  
 7.190  
 7.186  
 7.182  
 7.178  
 7.174  
 7.170  
 7.166  
 7.162  
 7.158  
 7.154  
 7.150  
 7.146  
 7.142  
 7.138  
 7.134  
 7.130  
 7.126  
 7.122  
 7.118  
 7.114  
 7.110  
 7.106  
 7.102  
 7.098  
 7.094  
 7.090  
 7.086  
 7.082  
 7.078  
 7.074  
 7.070  
 7.066  
 7.062  
 7.058  
 7.054  
 7.050  
 7.046  
 7.042  
 7.038  
 7.034  
 7.030  
 7.026  
 7.022  
 7.018  
 7.014  
 7.010  
 7.006  
 7.002  
 6.998  
 6.994  
 6.990  
 6.986  
 6.982  
 6.978  
 6.974  
 6.970  
 6.966  
 6.962  
 6.958  
 6.954  
 6.950  
 6.946  
 6.942  
 6.938  
 6.934  
 6.930  
 6.926  
 6.922  
 6.918  
 6.914  
 6.910  
 6.906  
 6.902  
 6.898  
 6.894  
 6.890  
 6.886  
 6.882  
 6.878  
 6.874  
 6.870  
 6.866  
 6.862  
 6.858  
 6.854  
 6.850  
 6.846  
 6.842  
 6.838  
 6.834  
 6.830  
 6.826  
 6.822  
 6.818  
 6.814  
 6.810  
 6.806  
 6.802  
 6.798  
 6.794  
 6.790  
 6.786  
 6.782  
 6.778  
 6.774  
 6.770  
 6.766  
 6.762  
 6.758  
 6.754  
 6.750  
 6.746  
 6.742  
 6.738  
 6.734  
 6.730  
 6.726  
 6.722  
 6.718  
 6.714  
 6.710  
 6.706  
 6.702  
 6.698  
 6.694  
 6.690  
 6.686  
 6.682  
 6.678  
 6.674  
 6.670  
 6.666  
 6.662  
 6.658  
 6.654  
 6.650  
 6.646  
 6.642  
 6.638  
 6.634  
 6.630  
 6.626  
 6.622  
 6.618  
 6.614  
 6.610  
 6.606  
 6.602  
 6.598  
 6.594  
 6.590  
 6.586  
 6.582  
 6.578  
 6.574  
 6.570  
 6.566  
 6.562  
 6.558  
 6.554  
 6.550  
 6.546  
 6.542  
 6.538  
 6.534  
 6.530  
 6.526  
 6.522  
 6.518  
 6.514  
 6.510  
 6.506  
 6.502  
 6.498  
 6.494  
 6.490  
 6.486  
 6.482  
 6.478  
 6.474  
 6.470  
 6.466  
 6.462  
 6.458  
 6.454  
 6.450  
 6.446  
 6.442  
 6.438  
 6.434  
 6.430  
 6.426  
 6.422  
 6.418  
 6.414  
 6.410  
 6.406  
 6.402  
 6.398  
 6.394  
 6.390  
 6.386  
 6.382  
 6.378  
 6.374  
 6.370  
 6.366  
 6.362  
 6.358  
 6.354  
 6.350  
 6.346  
 6.342  
 6.338  
 6.334  
 6.330  
 6.326  
 6.322  
 6.318  
 6.314  
 6.310  
 6.306  
 6.302  
 6.298  
 6.294  
 6.290  
 6.286  
 6.282  
 6.278  
 6.274  
 6.270  
 6.266  
 6.262  
 6.258  
 6.254  
 6.250  
 6.246  
 6.242  
 6.238  
 6.234  
 6.230  
 6.226  
 6.222  
 6.218  
 6.214  
 6.210  
 6.206  
 6.202  
 6.198  
 6.194  
 6.190  
 6.186  
 6.182  
 6.178  
 6.174  
 6.170  
 6.166  
 6.162  
 6.158  
 6.154  
 6.150  
 6.146  
 6.142  
 6.138  
 6.134  
 6.130  
 6.126  
 6.122  
 6.118  
 6.114  
 6.110  
 6.106  
 6.102  
 6.098  
 6.094  
 6.090  
 6.086  
 6.082  
 6.078  
 6.074  
 6.070  
 6.066  
 6.062  
 6.058  
 6.054  
 6.050  
 6.046  
 6.042  
 6.038  
 6.034  
 6.030  
 6.026  
 6.022  
 6.018  
 6.014  
 6.010  
 6.006  
 6.002  
 5.998  
 5.994  
 5.990  
 5.986  
 5.982  
 5.978  
 5.974  
 5.970  
 5.966  
 5.962  
 5.958  
 5.954  
 5.950  
 5.946  
 5.942  
 5.938  
 5.934  
 5.930  
 5.926  
 5.922  
 5.918  
 5.914  
 5.910  
 5.906  
 5.902  
 5.898  
 5.894  
 5.890  
 5.886  
 5.882  
 5.878  
 5.874  
 5.870  
 5.866  
 5.862  
 5.858  
 5.854  
 5.850  
 5.846  
 5.842  
 5.838  
 5.834  
 5.830  
 5.826  
 5.822  
 5.818  
 5.814  
 5.810  
 5.806  
 5.802  
 5.798  
 5.794  
 5.790  
 5.786  
 5.782  
 5.778  
 5.774  
 5.770  
 5.766  
 5.762  
 5.758  
 5.754  
 5.750  
 5.746  
 5.742  
 5.738  
 5.734  
 5.730  
 5.726  
 5.722  
 5.718  
 5.714  
 5.710  
 5.706  
 5.702  
 5.698  
 5.694  
 5.690  
 5.686  
 5.682  
 5.678  
 5.674  
 5.670  
 5.666  
 5.662  
 5.658  
 5.654  
 5.650  
 5.646  
 5.642  
 5.638  
 5.634  
 5.630  
 5.626  
 5.622  
 5.618  
 5.614  
 5.610  
 5.606  
 5.602  
 5.598  
 5.594  
 5.590  
 5.586  
 5.582  
 5.578  
 5.574  
 5.570  
 5.566  
 5.562  
 5.558  
 5.554  
 5.550  
 5.546  
 5.542  
 5.538  
 5.534  
 5.530  
 5.526  
 5.522  
 5.518  
 5.514  
 5.510  
 5.506  
 5.502  
 5.498  
 5.494  
 5.490  
 5.486  
 5.482  
 5.478  
 5.474  
 5.470  
 5.466  
 5.462  
 5.458  
 5.454  
 5.450  
 5.446  
 5.442  
 5.438  
 5.434  
 5.430  
 5.426  
 5.422  
 5.418  
 5.414  
 5.410  
 5.406  
 5.402  
 5.398  
 5.394  
 5.390  
 5.386  
 5.382  
 5.378  
 5.374  
 5.370  
 5.366  
 5.362  
 5.358  
 5.354  
 5.350  
 5.346  
 5.342  
 5.338  
 5.334  
 5.330  
 5.326  
 5.322  
 5.318  
 5.314  
 5.310  
 5.306  
 5.302  
 5.298  
 5.294  
 5.290  
 5.286  
 5.282  
 5.278  
 5.274  
 5.270  
 5.266  
 5.262  
 5.258  
 5.254  
 5.250  
 5.246  
 5.242  
 5.238  
 5.234  
 5.230  
 5.226  
 5.222  
 5.218  
 5.214  
 5.210  
 5.206  
 5.202  
 5.198  
 5.194  
 5.190  
 5.186  
 5.182  
 5.178  
 5.174  
 5.170  
 5.166  
 5.162  
 5.158  
 5.154  
 5.150  
 5.146  
 5.142  
 5.138  
 5.134  
 5.130  
 5.126  
 5.122  
 5.118  
 5.114  
 5.110  
 5.106  
 5.102  
 5.098  
 5.094  
 5.090  
 5.086  
 5.082  
 5.078  
 5.074  
 5.070  
 5.066  
 5.062  
 5.058  
 5.054  
 5.050  
 5.046  
 5.042  
 5.038  
 5.034  
 5.030  
 5.026  
 5.022  
 5.018  
 5.014  
 5.010  
 5.006  
 5.002  
 4.998  
 4.994  
 4.990  
 4.986  
 4.982  
 4.978  
 4.974  
 4.970  
 4.966  
 4.962  
 4.958  
 4.954  
 4.950  
 4.946  
 4.942  
 4.938  
 4.934  
 4.930  
 4.926  
 4.922  
 4.918  
 4.914  
 4.910  
 4.906  
 4.902  
 4.898  
 4.894  
 4.890  
 4.886  
 4.882  
 4.878  
 4.874  
 4.870  
 4.866  
 4.862  
 4.858  
 4.854  
 4.850  
 4.846  
 4.842  
 4.838  
 4.834  
 4.830  
 4.826  
 4.822  
 4.818  
 4.814  
 4.810  
 4.806  
 4.802  
 4.798  
 4.794  
 4.790  
 4.786  
 4.782  
 4.778  
 4.774  
 4.770  
 4.766  
 4.762  
 4.758  
 4.754  
 4.750  
 4.746  
 4.742  
 4.738  
 4.734  
 4.730  
 4.726  
 4.722  
 4.718  
 4.714  
 4.710  
 4.706  
 4.702  
 4.698  
 4.694  
 4.690  
 4.686  
 4.682  
 4.678  
 4.674  
 4.670  
 4.666  
 4.662  
 4.658  
 4.654  
 4.650  
 4.646  
 4.642  
 4.638  
 4.634  
 4.630  
 4.626  
 4.622  
 4.618  
 4.614  
 4.610  
 4.606  
 4.602  
 4.598  
 4.594  
 4.590  
 4.586  
 4.582  
 4.578  
 4.574  
 4.570  
 4.566  
 4.562  
 4.558  
 4.554  
 4.550  
 4.546  
 4.542  
 4.538  
 4.534  
 4.530  
 4.526  
 4.522  
 4.518  
 4.514  
 4.510  
 4.506  
 4.502  
 4.498  
 4.494  
 4.490  
 4.486  
 4.482  
 4.478  
 4.474  
 4.470  
 4.466  
 4.462  
 4.458  
 4.454  
 4.450  
 4.446  
 4.442  
 4.438  
 4.434  
 4.430  
 4.426  
 4.422  
 4.418  
 4.414  
 4.410  
 4.406  
 4.402  
 4.398  
 4.394  
 4.390  
 4.386  
 4.382  
 4.378  
 4.374  
 4.370  
 4.366  
 4.362  
 4.358  
 4.354  
 4.350  
 4.346  
 4.342  
 4.338  
 4.334  
 4.330  
 4.326  
 4.322  
 4.318  
 4.314  
 4.310  
 4.306  
 4.302  
 4.298  
 4.294  
 4.290  
 4.286  
 4.282  
 4.278  
 4.274  
 4.270  
 4.266  
 4.262  
 4.258  
 4.254  
 4.250  
 4.246  
 4.242  
 4.238  
 4.234  
 4.230  
 4.226  
 4.222  
 4.218  
 4.214  
 4.210  
 4.206  
 4.202  
 4.198  
 4.194  
 4.190  
 4.186  
 4.182  
 4.178  
 4.174  
 4.170  
 4.166  
 4.162  
 4.158  
 4.154  
 4.150  
 4.146  
 4.142  
 4.138  
 4.134  
 4.130  
 4.126  
 4.122  
 4.118  
 4.114  
 4.110  
 4.106  
 4.102  
 4.098  
 4.094  
 4.090  
 4.086  
 4.082  
 4.078  
 4.074  
 4.070  
 4.066  
 4.062  
 4.058  
 4.054  
 4.050  
 4.046  
 4.042  
 4.038  
 4.034  
 4.030  
 4.026  
 4.022  
 4.018  
 4.014  
 4.010  
 4.006  
 4.002  
 3.998  
 3.994  
 3.990  
 3.986  
 3.982  
 3.978  
 3.974  
 3.970  
 3.966  
 3.962  
 3.958  
 3.954  
 3.950  
 3.946  
 3.942  
 3.938  
 3.934  
 3.930  
 3.926  
 3.922  
 3.918  
 3.914  
 3.910  
 3.906  
 3.902  
 3.898  
 3.894  
 3.890  
 3.886  
 3.882  
 3.878  
 3.874  
 3.870  
 3.866  
 3.862  
 3.858  
 3.854  
 3.850  
 3.846  
 3.842  
 3.838  
 3.834  
 3.830  
 3.826  
 3.822  
 3.818  
 3.814  
 3.810  
 3.806  
 3.802  
 3.798  
 3.794  
 3.790  
 3.786  
 3.782  
 3.778  
 3.774  
 3.770  
 3.766  
 3.762  
 3.758  
 3.754  
 3.750  
 3.746  
 3.742  
 3.738  
 3.734  
 3.730  
 3.726  
 3.722  
 3.718  
 3.714  
 3.710  
 3.706  
 3.702  
 3.698  
 3.694  
 3.690  
 3.686  
 3.682  
 3.678  
 3.674  
 3.670  
 3.666  
 3.662  
 3.658  
 3.654  
 3.650  
 3.646  
 3.642  
 3.638  
 3.634  
 3.630  
 3.626  
 3.622  
 3.618  
 3.614  
 3.610  
 3.606  
 3.602  
 3.598  
 3.594  
 3.590  
 3.586  
 3.582  
 3.578  
 3.574  
 3.570  
 3.566  
 3.562  
 3.558  
 3.554  
 3.550  
 3.546  
 3.542  
 3.538  
 3.534  
 3.530  
 3.526  
 3.522  
 3.518  
 3.514  
 3.510  
 3.506  
 3.502  
 3.498  
 3.494  
 3.490  
 3.486  
 3.482  
 3.478  
 3.474  
 3.470  
 3.466  
 3.462  
 3.458  
 3.454  
 3.450  
 3.446  
 3.442  
 3.438  
 3.434  
 3.430  
 3.426  
 3.422  
 3.418  
 3.414  
 3.410  
 3.406  
 3.402  
 3.398  
 3.394  
 3.390  
 3.386  
 3.382  
 3.378  
 3.374  
 3.370  
 3.366  
 3.362  
 3.358  
 3.354  
 3.350  
 3.346  
 3.342  
 3.338  
 3.334  
 3.330  
 3.326  
 3.322  
 3.318  
 3.314  
 3.310  
 3.306  
 3.302  
 3.298  
 3.294  
 3.290  
 3.286  
 3.282  
 3.278  
 3.274  
 3.270  
 3.266  
 3.262  
 3.258  
 3.254  
 3.250  
 3.246  
 3.242  
 3.238  
 3.234  
 3.230  
 3.226  
 3.222  
 3.218  
 3.214  
 3.210  
 3.206  
 3.202  
 3.198

NAME dhx-pd8-H2O131212  
 EXPNO 10  
 PROCNO 1  
 Date\_ 20131212  
 Time 11.00  
 INSTRUM spect  
 PROBR0 5 mm F4000 MR/   
 PULPROG zgpg30  
 TD 65536  
 FIDRES 0.122269 Hz  
 AQ 4.0894966 sec  
 RG 20.2  
 DW 62.400 usec  
 DE 6.50 usec  
 TE 297.2 K  
 D1 1.00000000 sec  
 D11  
 TDO

===== CHANNEL f1 =====  
 RF01 400.1324710 MHz  
 NUC1 1H  
 P1 14.10 usec  
 PT 65136  
 RF 400.1324710 MHz  
 WNM EM  
 SSB 0  
 LB 0.30 Hz  
 GB 0  
 PC 1.00

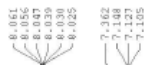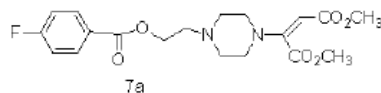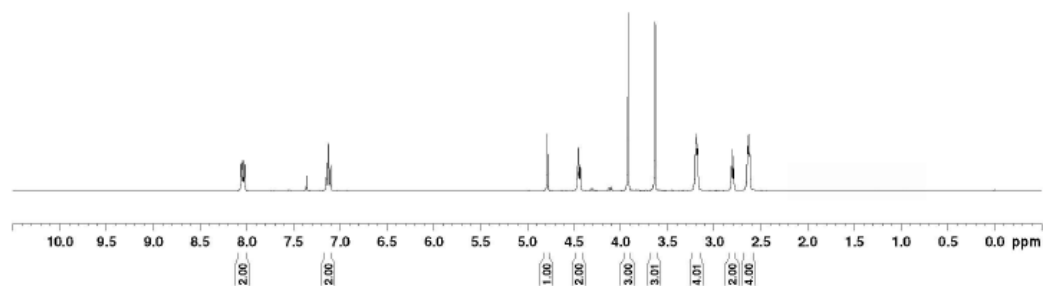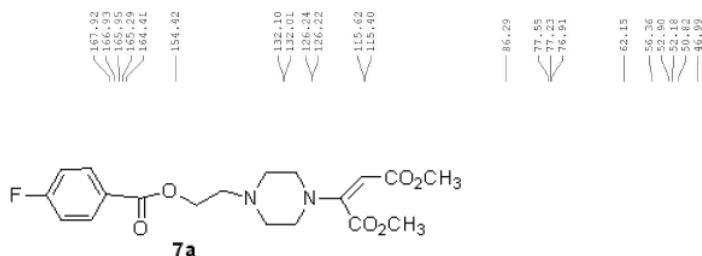

NAME dhx-pd8-c20131212  
 EXPNO 10  
 PROCNO 1  
 Date\_ 20131212  
 Time 11.13  
 INSTRUM spect  
 PROBR0 5 mm F4000 MR/   
 PULPROG zgpg30  
 TD 65536  
 FIDRES 0.122269 Hz  
 AQ 4.0894966 sec  
 RG 20.2  
 DW 62.400 usec  
 DE 6.50 usec  
 TE 297.2 K  
 D1 1.00000000 sec  
 D11  
 TDO

===== CHANNEL f1 =====  
 RF01 100.6228299 MHz  
 NUC1 13C  
 P1 12.40 usec  
 PT 32768  
 RF 100.6127719 MHz  
 WNM EM  
 SSB 0  
 LB 1.40 Hz  
 GB 0  
 PC 1.40

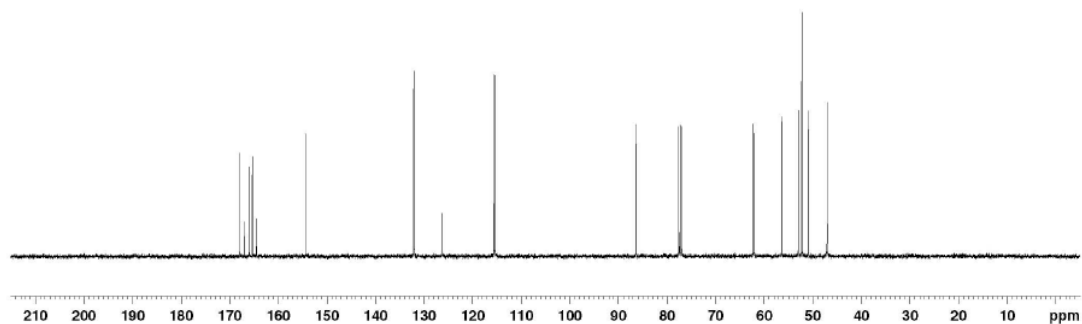

NAME chr-pd10-020131212  
 EXPNO 10  
 PROCNO 1  
 Date\_ 20131212  
 Time 11.28  
 INSTRUM spect  
 FREQID 5 mm F4000 BB/  
 PULPROG zgpg30  
 TD 65536  
 SFO 400.1324710  
 SOLVENT CDCl3  
 NS 2  
 DS 2  
 SWH 8011.820 Hz  
 FIDRES 0.122298 Hz  
 AQ 4.0094966 sec  
 RG 32  
 DW 62.400 usec  
 DE 6.50 usec  
 TE 299.0 K  
 D1 1.0000000 sec  
 TDO 1  
 ===== CHANNEL f1 =====  
 SPOL 400.1324710 MHz  
 NUCL1 1H  
 P1 14.10 usec  
 PL 0.00 dB  
 RF 400.1299945 MHz  
 VCM 0  
 LB 0.30 Hz  
 GB 0  
 PC 1.00

7.713  
7.707  
7.542  
7.534  
7.528  
7.520  
7.399  
7.391  
7.383

6.476  
6.470

4.781

4.254  
4.246  
4.225

3.921

3.538

3.208  
3.196  
3.188  
2.755  
2.741  
2.727  
2.609  
2.597

0.000

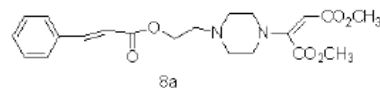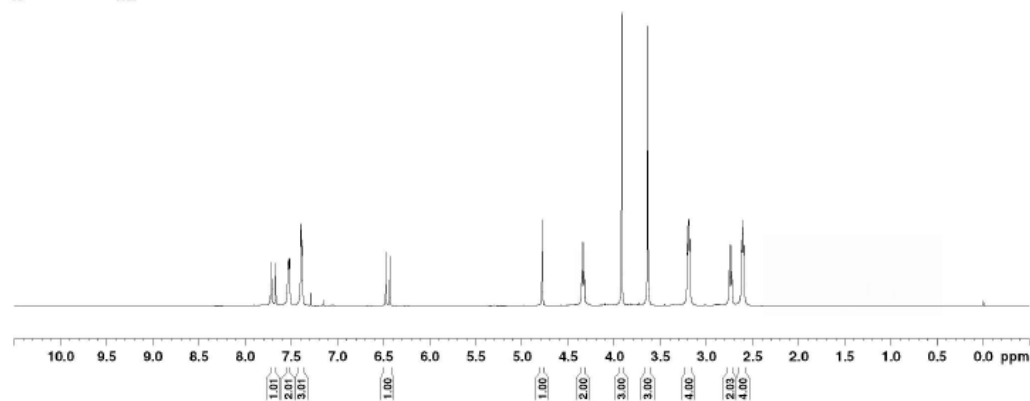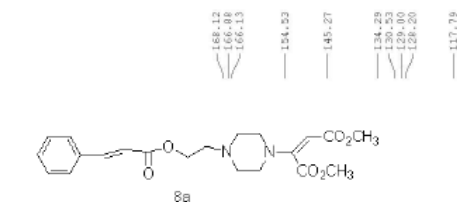

168.12  
166.88  
166.13

154.53

145.27

134.29  
130.53  
128.00  
128.20

117.79

86.82

77.55  
77.23  
76.91

61.58

56.29  
56.00  
55.72  
51.03  
47.05

NAME chr-pd10-020131212  
 EXPNO 10  
 PROCNO 1  
 Date\_ 20131212  
 Time 11.33  
 INSTRUM spect  
 FREQID 5 mm F4000 BB/  
 PULPROG zgpg30  
 TD 65536  
 SFO 400.1324710  
 SOLVENT CDCl3  
 NS 2  
 DS 2  
 SWH 24038.461 Hz  
 FIDRES 0.364798 Hz  
 AQ 1.3631988 sec  
 RG 645  
 DW 20.800 usec  
 DE 6.50 usec  
 TE 299.0 K  
 D1 2.0000000 sec  
 D11 0.0300000 sec  
 TDO 1  
 ===== CHANNEL f1 =====  
 SPOL 100.6228290 MHz  
 NUCL1 13C  
 P1 12.00 usec  
 PL 0.00 dB  
 RF 100.6127615 MHz  
 VCM 0  
 LB 1.00 Hz  
 GB 0  
 PC 1.40

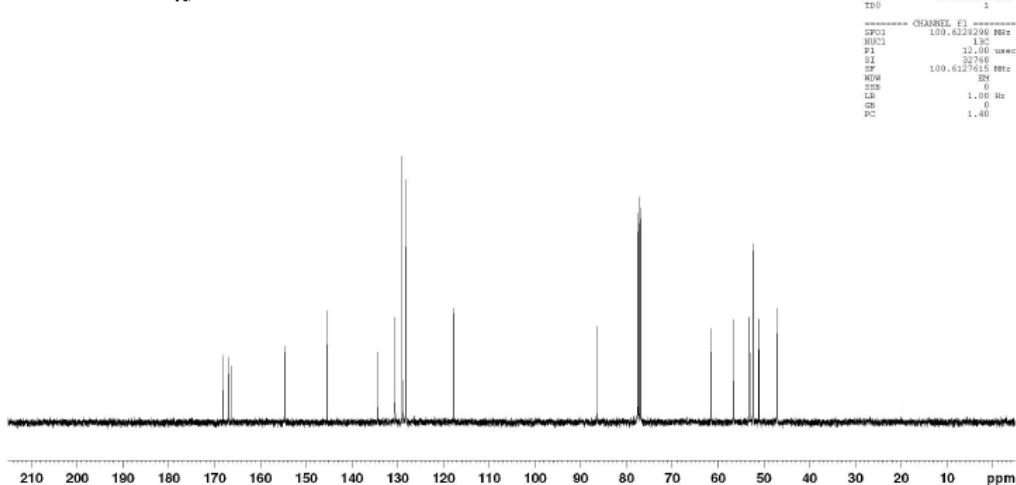

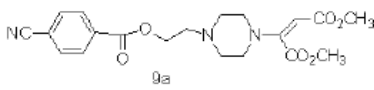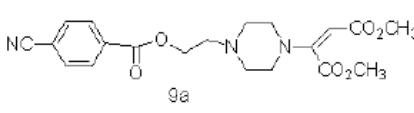

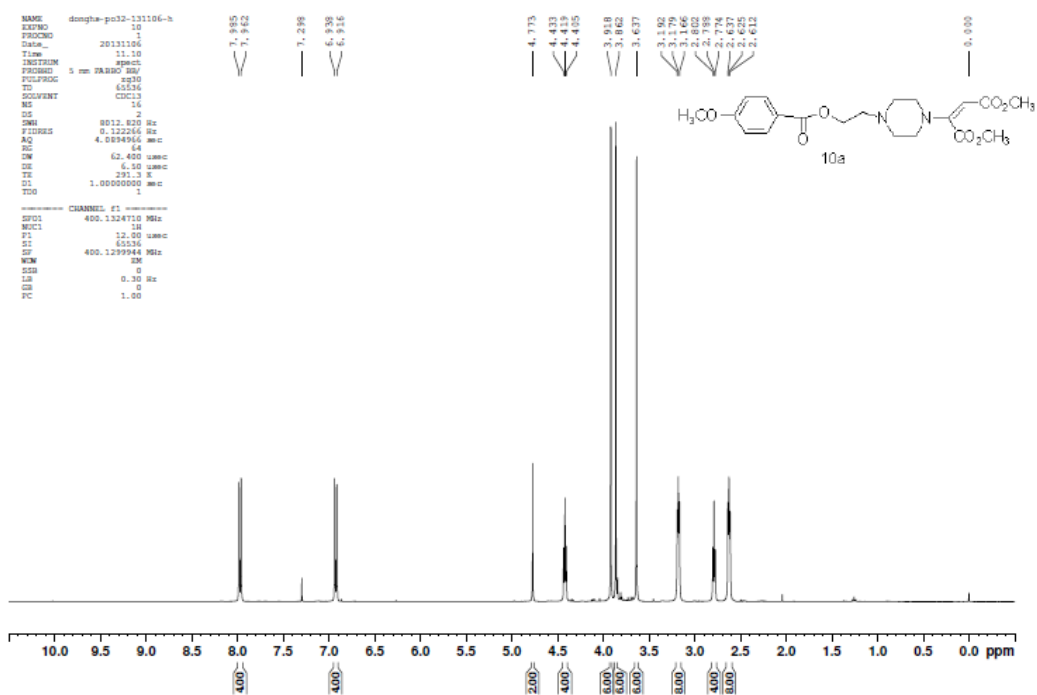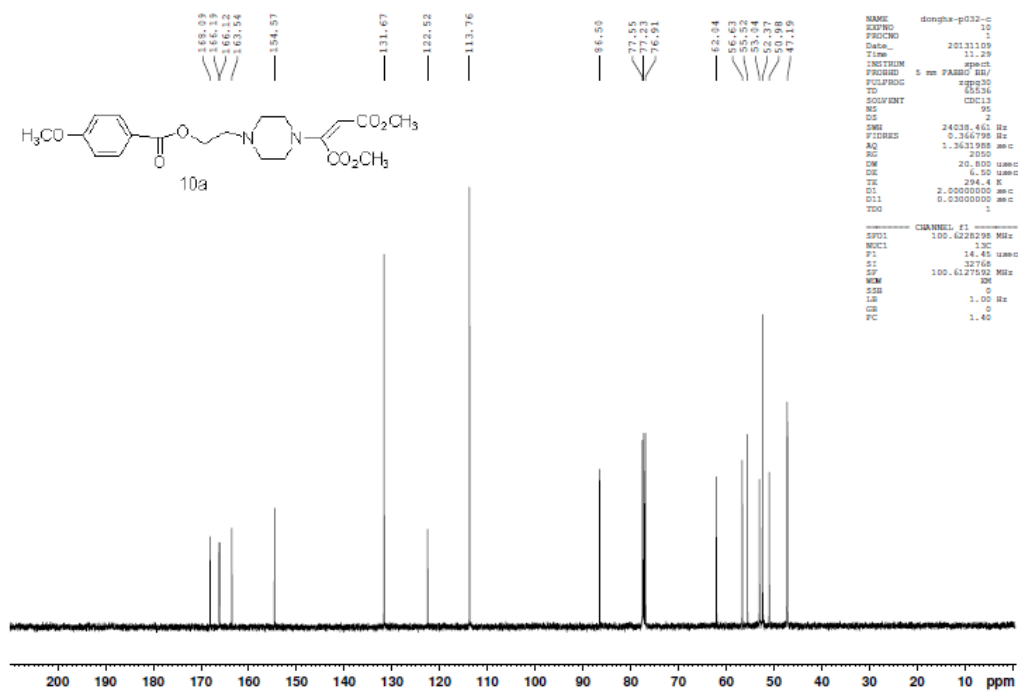

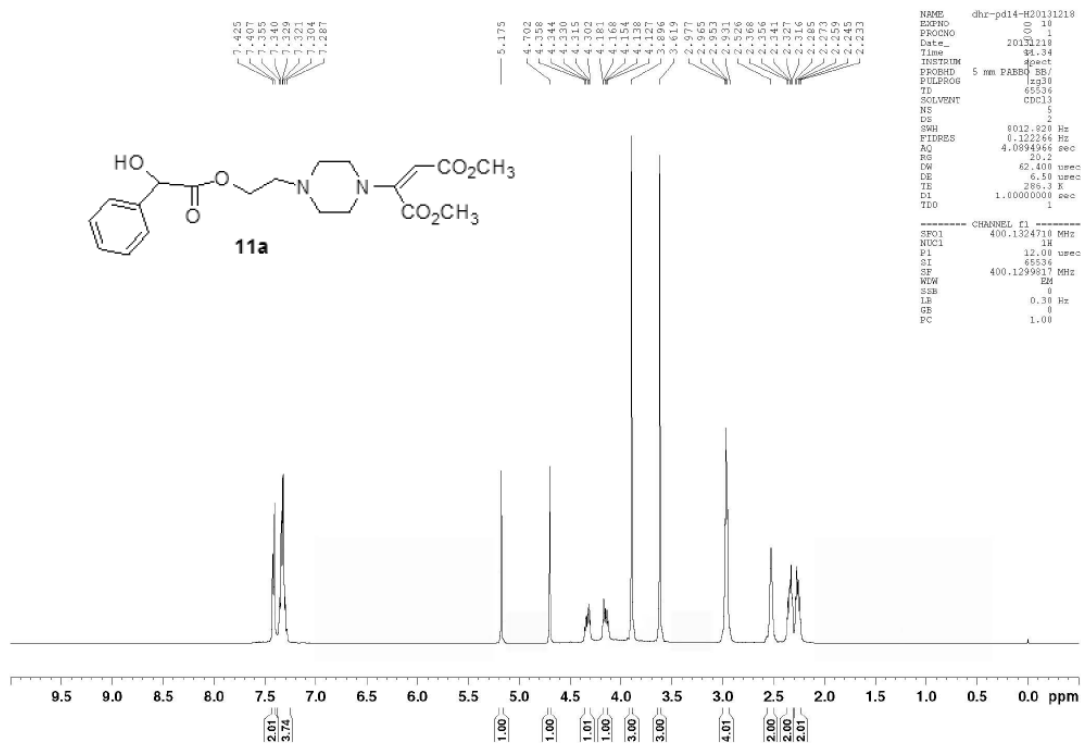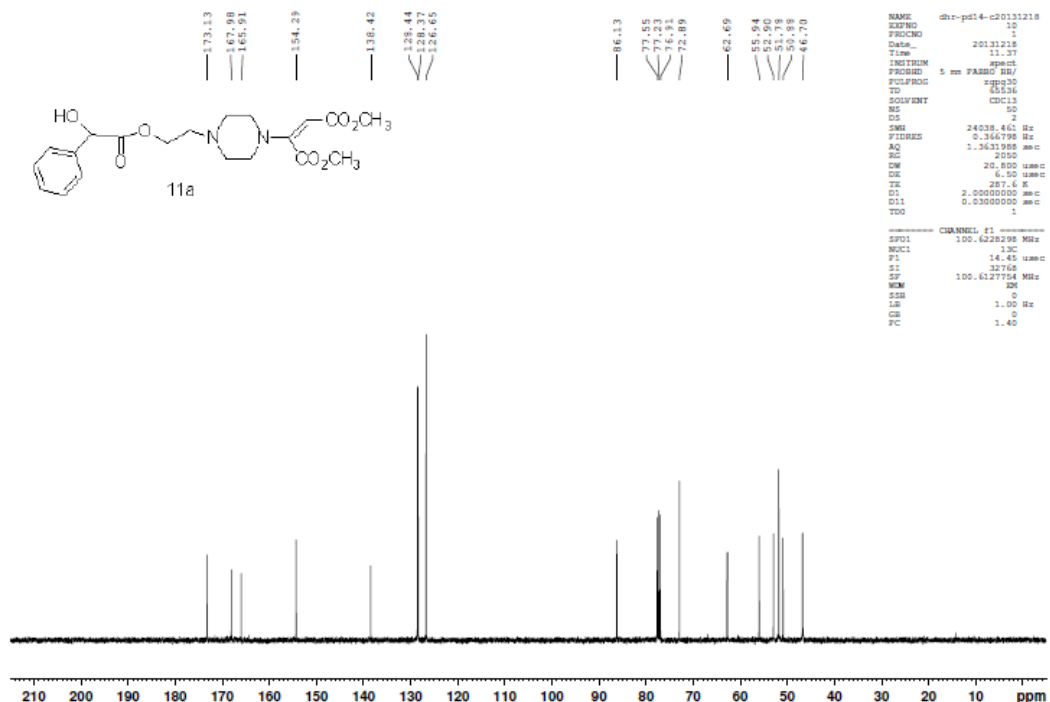



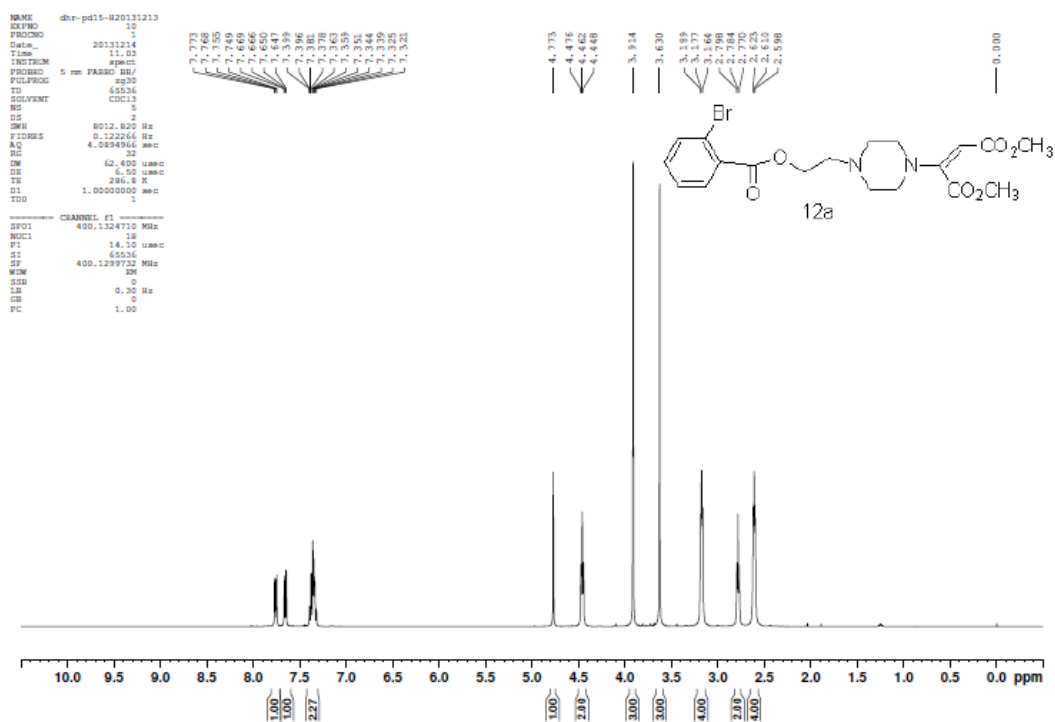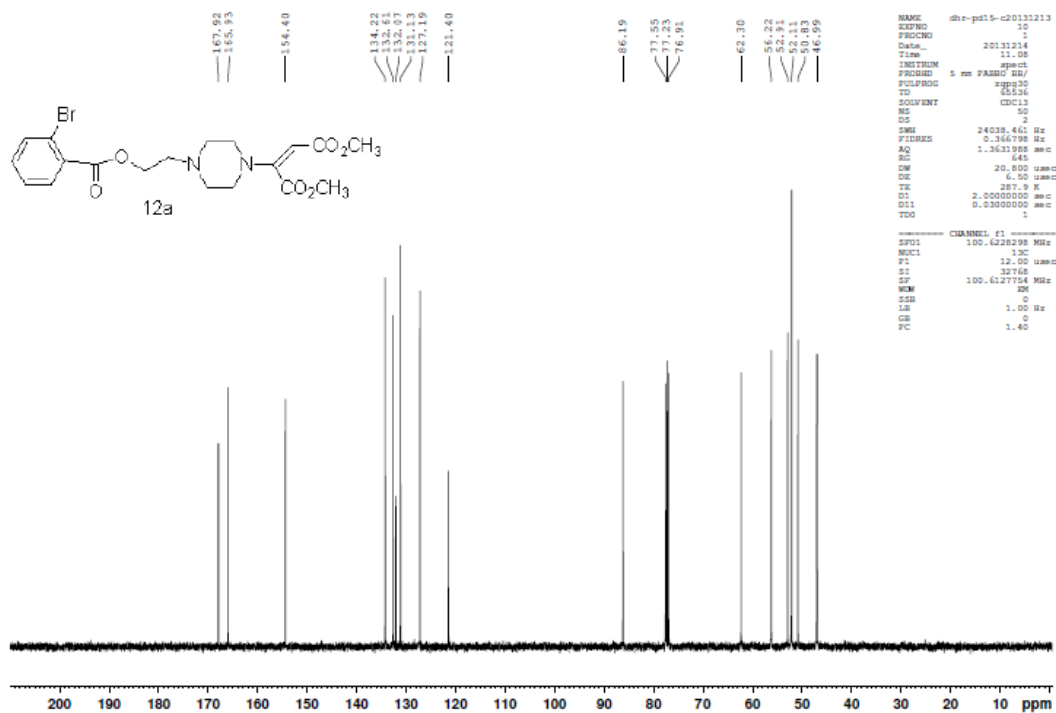

NAME dhc-pd17-c20131216  
EXPNO 10  
PROCNO 1  
Date\_ 20131216  
Time 10.59  
INSTRUM spect  
PROBHD 5 mm F4BBO BB/  
PULPROG zgpg30  
TD 65536  
SOLVENT CDCl3  
NS 5  
DS 2  
SWH 8012.8200 Hz  
FIDRES 0.122266 Hz  
AQ 4.0894966 sec  
RG 20.4  
DM 62.400 usec  
DE 6.50 usec  
TE 285.5 K  
D1 1.00000000 sec  
D11 1  
TDO

===== CHANNEL f1 =====  
SF01 400.1324710 MHz  
NUC1 13C  
P1 14.10 usec  
S1 65536  
SF 400.1299721 MHz  
WDW EM  
SSB 0  
LB 0.30 Hz  
GB 0  
PC 1.00

7.783  
7.779  
7.763  
7.759  
7.593  
7.489  
7.482  
7.464  
7.460  
7.320  
6.999  
6.983  
6.978  
6.965

4.774  
4.435  
4.421  
4.407  
3.913  
3.897  
3.629  
3.188  
3.176  
3.163  
3.150  
2.775  
2.761  
2.632  
2.622  
2.609

0.000

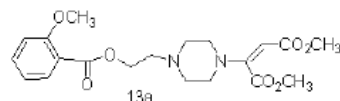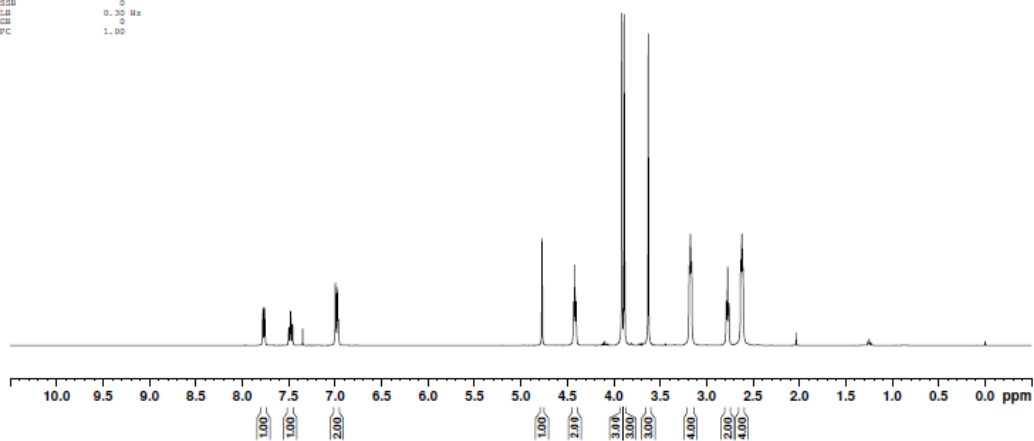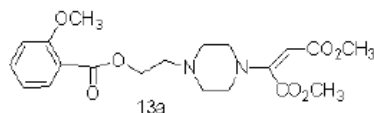

167.94  
165.95  
165.84  
158.99  
154.42  
133.40  
131.42  
120.01  
118.59  
111.88  
86.08  
77.55  
77.23  
76.91  
61.90  
55.78  
52.89  
52.27  
52.00  
51.90

NAME dhc-pd17-c20131216  
EXPNO 10  
PROCNO 1  
Date\_ 20131216  
Time 11.01  
INSTRUM spect  
PROBHD 5 mm F4BBO BB/  
PULPROG zgpg30  
TD 65536  
SOLVENT CDCl3  
NS 29  
DS 2  
SWH 24038.461 Hz  
FIDRES 0.366798 Hz  
AQ 1.3621988 sec  
RG 1030  
DM 20.800 usec  
DE 6.50 usec  
TE 286.2 K  
D1 2.00000000 sec  
D11 0.03000000 sec  
TDO

===== CHANNEL f1 =====  
SF01 100.6228298 MHz  
NUC1 13C  
P1 12.00 usec  
S1 32768  
SF 100.6127782 MHz  
WDW EM  
SSB 0  
LB 1.00 Hz  
GB 0  
PC 1.40

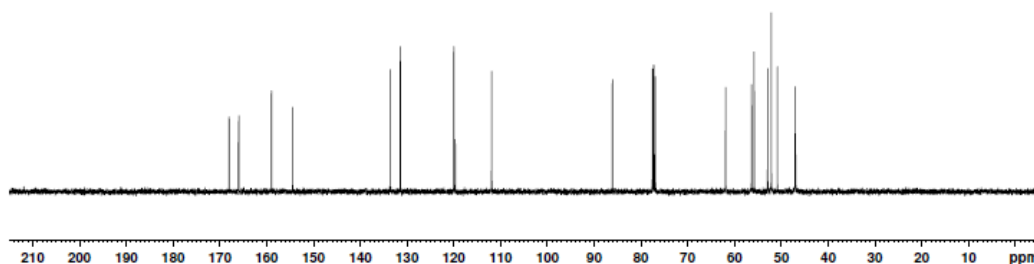

— 0.000

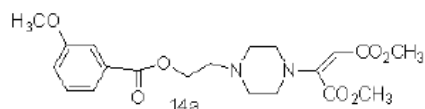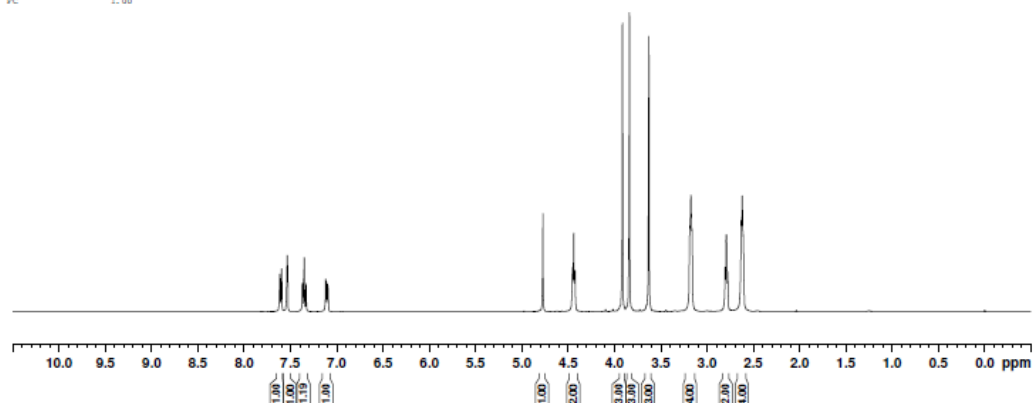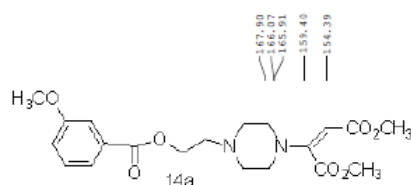

— 62.15  
 \ 56.30  
 \ 55.27  
 \ 52.86  
 \ 52.14  
 \ 50.79  
 \ 46.96

|         |                    |
|---------|--------------------|
| NAME    | chr-pd18-H20131216 |
| EXPNO   | 11                 |
| FREQNO  | 1                  |
| Date_   | 20131216           |
| Time    | 11.12              |
| INSTRUM | spect              |
| PROBHD  | 5 mm F4BBO BB/     |
| PULPROG | zgpg30             |
| TD      | 65536              |
| SOLVENT | CDCl3              |
| NS      | 50                 |
| DS      | 2                  |
| SWH     | 24038.461 Hz       |
| FIDRES  | 0.366798 Hz        |
| AQ      | 1.3631988 sec      |
| RG      | 812                |
| DW      | 20.800 usec        |
| DE      | 6.50 usec          |
| TE      | 286.5 K            |
| D1      | 2.00000000 sec     |
| D11     | 0.03000000 sec     |
| TD0     | 1                  |

```

***** CHANNEL #1 *****
SFO1      100.622829 MHz
NUC1              13C
F1              12.00 umol
SI              32768
SF      100.6127769 MHz
MGM              RM
SSH              0
LR              1.00 Hz
GB              0
FC              1.40

```

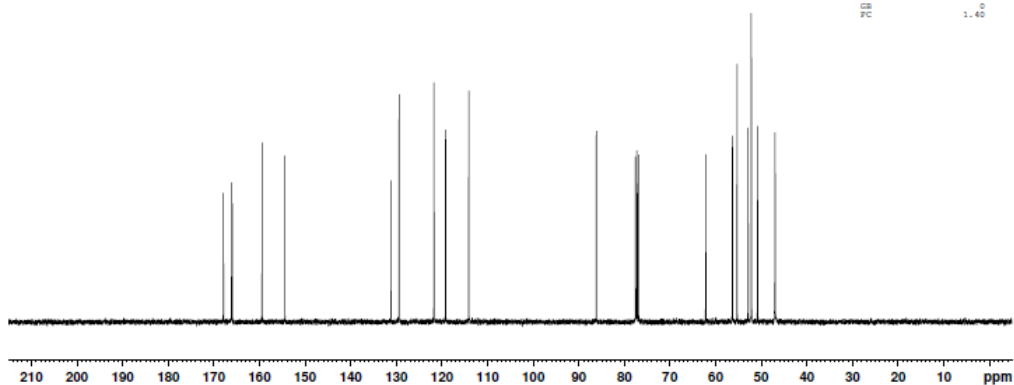



NAME chr-pg20-H20131216  
 EXPNO 10  
 PROCNO 1  
 Date\_ 20131216  
 Time 11.27  
 INSTRUM spect  
 PROBHD 5 mm FASBO BB/  
 PULPROG zgpg30  
 TO 65536  
 SOLVENT CDCl3  
 NS 5  
 DS 2  
 SWH 8012.820 Hz  
 FIDRES 0.122266 Hz  
 AQ 4.084966 sec  
 RG 20.2  
 SW 62.480 ussec  
 DE 6.50 ussec  
 TE 295.8 K  
 D1 1.0000000 sec  
 TD 1

===== CHANNEL f1 =====  
 SFO1 400.1324710 MHz  
 NUCL1 1H  
 P1 14.10 ussec  
 S1 65536  
 SF 400.1299535 MHz  
 WDW EM  
 SS 0  
 LB 0.30 Hz  
 GB 0  
 PC 1.00

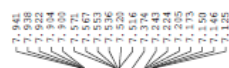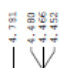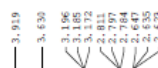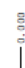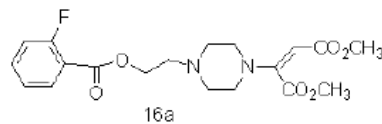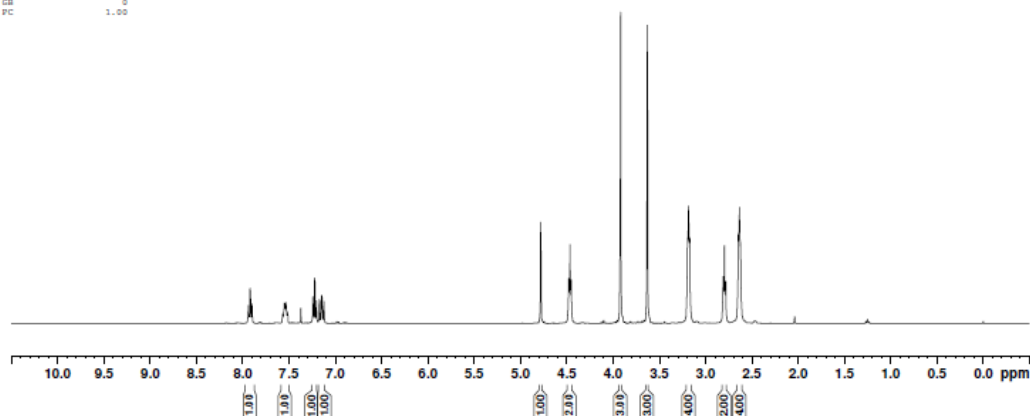

NAME chr-pg20-H20131216  
 EXPNO 11  
 PROCNO 1  
 Date\_ 20131216  
 Time 11.32  
 INSTRUM spect  
 PROBHD 5 mm FASBO BB/  
 PULPROG zgpg30  
 TO 65536  
 SOLVENT CDCl3  
 NS 50  
 DS 24038.461 Hz  
 FIDRES 0.364798 Hz  
 AQ 1.343198 sec  
 RG 812  
 SW 20.800 ussec  
 DE 6.50 ussec  
 TE 296.8 K  
 D1 2.0000000 sec  
 D11 0.0300000 sec  
 TD 1

===== CHANNEL f1 =====  
 SFO1 100.6229298 MHz  
 NUCL1 13C  
 P1 12.00 ussec  
 S1 32768  
 SF 100.6127762 MHz  
 WDW EM  
 SS 0  
 LB 1.00 Hz  
 GB 0  
 PC 1.40

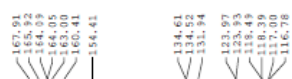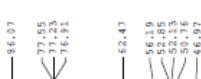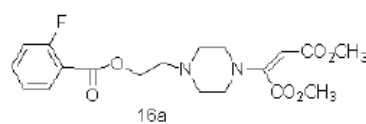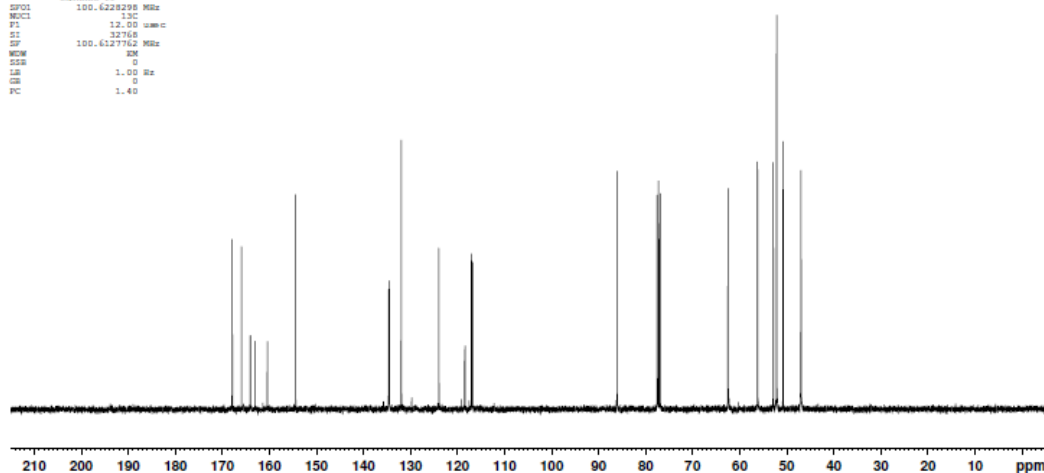



— 0.000

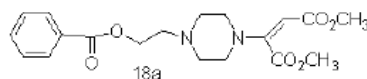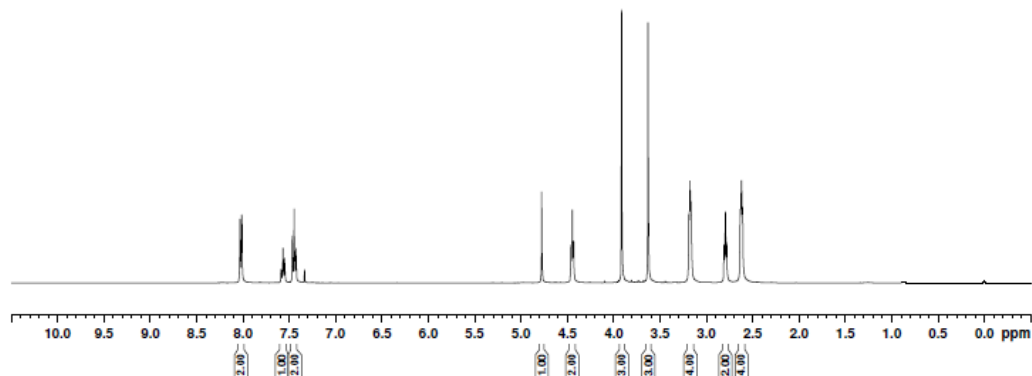

Chemical structure of **18a**: COC(=O)CN1CCN(CC1)CCOC(=O)c2ccccc2

<sup>13</sup>C NMR spectrum (CDCl<sub>3</sub>) data:

| Chemical Shift (ppm) |
|----------------------|
| 177.5                |
| 177.2                |
| 176.9                |
| 176.6                |
| 162.15               |
| 157.26               |
| 156.98               |
| 156.7                |
| 154.43               |
| 133.03               |
| 132.95               |
| 132.91               |
| 132.87               |
| 132.78               |
| 86.23                |
| 77.55                |
| 77.31                |
| 76.91                |
| 62.15                |
| 56.39                |
| 52.35                |
| 52.29                |
| 52.20                |
| 50.85                |
| 47.02                |

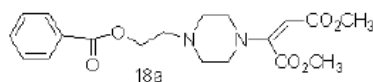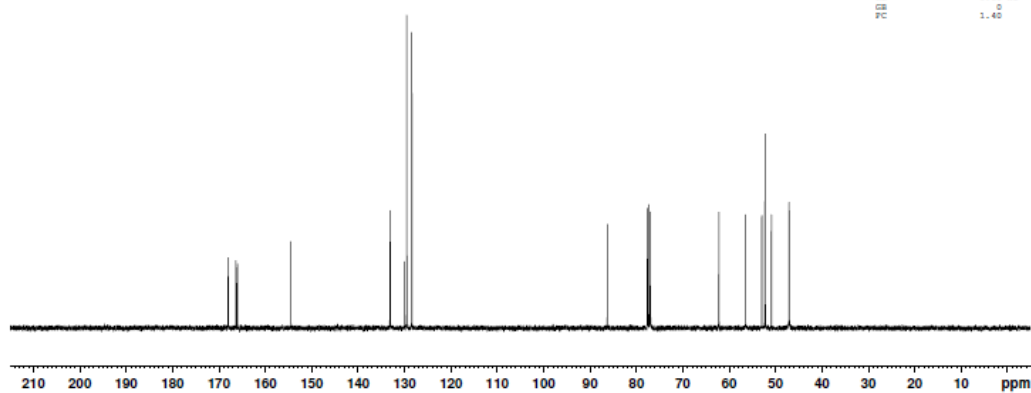

NAME chr-pd24-H20131216  
 EXPNO 10  
 PROCNO 1  
 Date\_ 20131216  
 Time 12.17  
 INSTRUM spect  
 FREQ05 5 mm F4000 BB  
 PULPROG zgpg30  
 TO 65536  
 SOLVENT CDCl3  
 NS 50  
 DS 2  
 SWH 8012.820 Hz  
 FIDRES 0.122266 Hz  
 AQ 4.0894966 sec  
 RG 16  
 CW 62.400 usec  
 DE 6.50 usec  
 TE 287.0 K  
 D1 1.00000000 sec  
 TD 1

===== CHANNEL f1 =====  
 SFO1 400.1324710 MHz  
 NUC1 1H  
 P1 12.00 usec  
 SI 65536  
 SF 400.1299803 MHz  
 WDW RM  
 SSB 0  
 LB 0.30 Hz  
 GB 0  
 PC 1.00

7.328  
7.309  
7.290  
7.276  
7.259

4.137  
4.211  
4.212  
4.184  
3.903  
3.623  
3.071  
3.059  
3.047  
2.822  
2.588  
2.575  
2.460  
2.448  
2.416

0.100

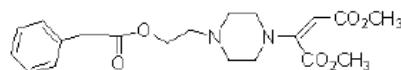

19a

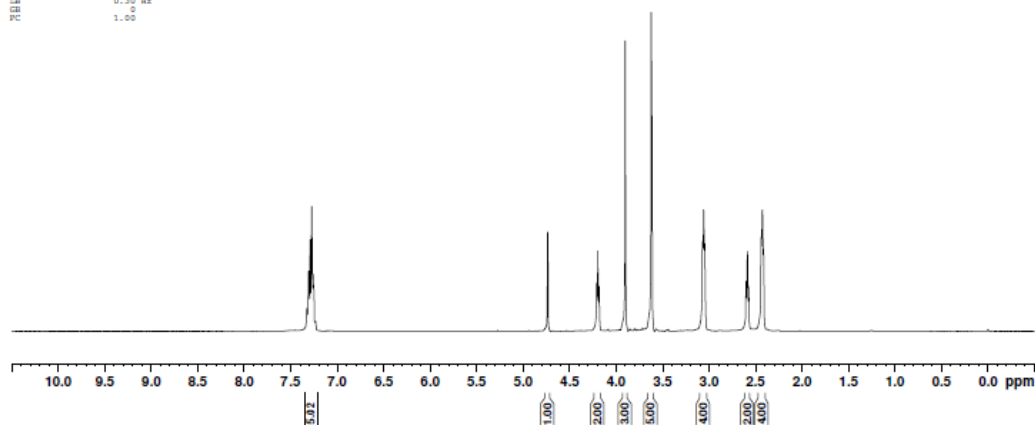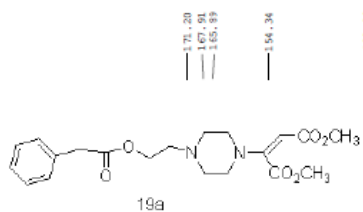

19a

171.20  
167.91  
165.99  
154.34

133.96  
129.16  
127.03  
127.00

86.05  
77.55  
77.23  
76.91

61.79  
56.16  
52.84  
51.99  
50.22  
46.86

41.28

NAME chr-pd24-H20131216  
 EXPNO 11  
 PROCNO 1  
 Date\_ 20131216  
 Time 12.17  
 INSTRUM spect  
 FREQ05 5 mm F4000 BB  
 PULPROG zgpg30  
 TO 65536  
 SOLVENT CDCl3  
 NS 50  
 DS 2  
 SWH 24038.461 Hz  
 FIDRES 0.136798 Hz  
 AQ 1.3631988 sec  
 RG 1620  
 CW 20.800 usec  
 DE 6.50 usec  
 TE 287.0 K  
 D1 2.00000000 sec  
 D11 0.33000000 sec  
 TD 1

===== CHANNEL f1 =====  
 SFO1 100.6228298 MHz  
 NUC1 13C  
 P1 14.45 usec  
 SI 32768  
 SF 100.6127798 MHz  
 WDW RM  
 SSB 0  
 LB 1.00 Hz  
 GB 0  
 PC 1.40

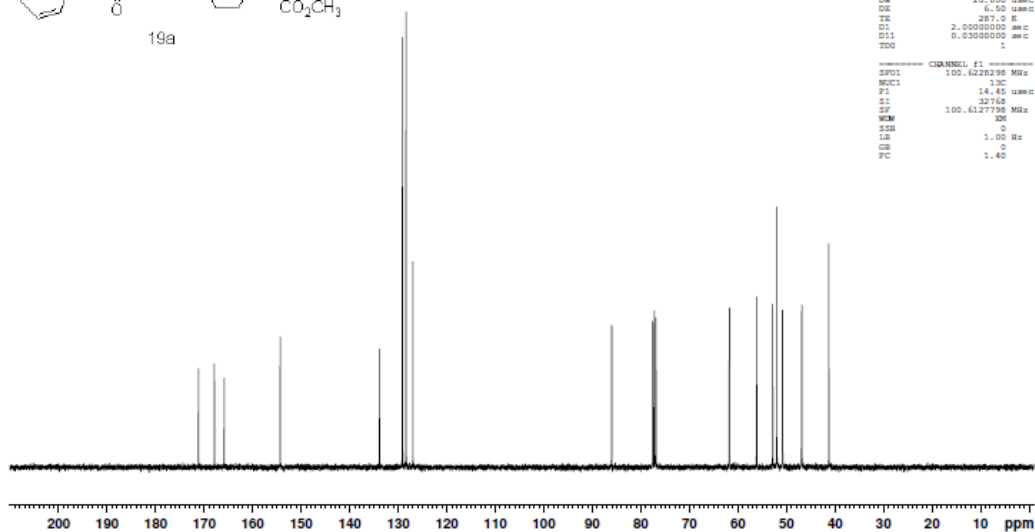



0.000

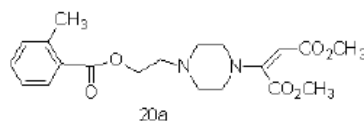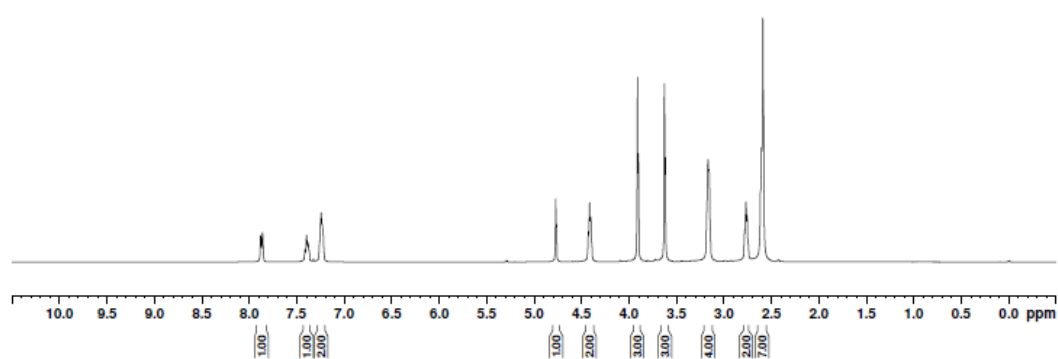

— 86.23

77.55  
77.23  
76.91

— 81.57

56.42  
52.91  
52.15  
50.83  
47.01

— 31.66

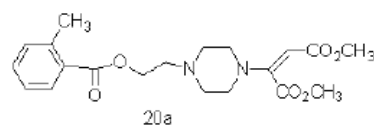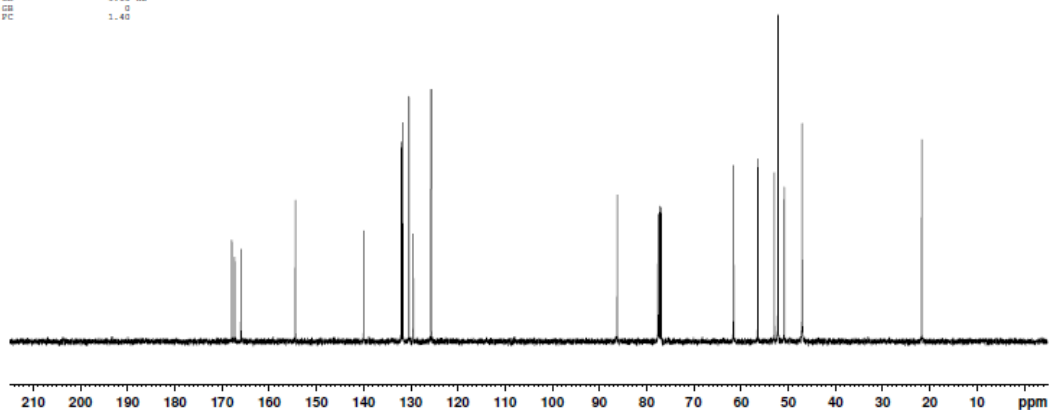

NAME chr-pd26-H20131216  
 EXPNO 1  
 PROCNO 1  
 Date\_ 20131216  
 Time 16.53  
 INSTRUM spect  
 PROBRD 5 mm F4000 BB/  
 PULPROG zgpg30  
 TD 65536  
 SOLVENT CDCl3  
 NS 1  
 DS 2  
 SWH 8012.620 Hz  
 FIDRES 0.121155 Hz  
 AQ 4.0894956 sec  
 Pw 11.4  
 CW 62.400 usec  
 DE 4.50 usec  
 TE 297.3 K  
 D1 1.00000000 sec  
 TDO 1

===== CHANNEL f1 =====  
 SPOL 800.1324710 MHz  
 NUC1 1H  
 P1 14.10 usec  
 SI 65536  
 SF 800.1299955 MHz  
 NMW 5M  
 LB 0.30 Hz  
 GB 0  
 PC 1.00

7.289  
7.277  
7.273  
7.168  
7.152  
7.131  
6.809  
6.787

4.763  
4.726  
4.528  
4.516  
4.303  
3.913  
3.631  
3.128  
2.657  
2.644  
2.631  
2.611

0.000

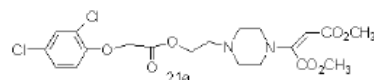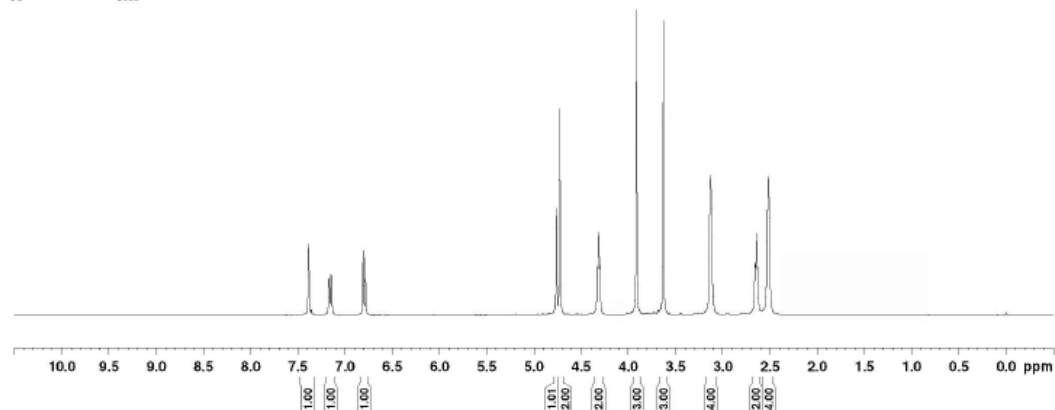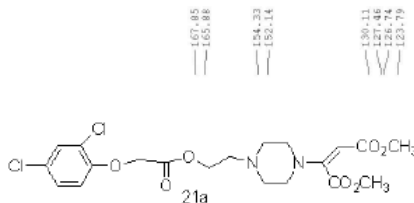

167.85  
165.88  
154.32  
152.14  
130.11  
129.86  
126.74  
123.79  
114.34

86.29  
77.55  
77.23  
76.91  
65.96  
62.21  
56.12  
52.88  
52.49  
51.81  
46.87

NAME chr-pd26-H20131216  
 EXPNO 1  
 PROCNO 1  
 Date\_ 20131216  
 Time 16.59  
 INSTRUM spect  
 PROBRD 5 mm F4000 BB/  
 PULPROG zgpg30  
 TD 65536  
 SOLVENT CDCl3  
 NS 1  
 DS 2  
 SWH 24056.461 Hz  
 FIDRES 0.364798 Hz  
 AQ 1.3651088 sec  
 Pw 91.2  
 CW 20.900 usec  
 DE 4.50 usec  
 TE 298.1 K  
 D1 2.00000000 sec  
 D11 0.03000000 sec  
 TDO 1

===== CHANNEL f1 =====  
 SPOL 100.6220290 MHz  
 NUC1 13C  
 P1 12.00 usec  
 SI 32768  
 SF 100.6227762 MHz  
 NMW 5M  
 LB 1.00 Hz  
 GB 0  
 PC 1.40

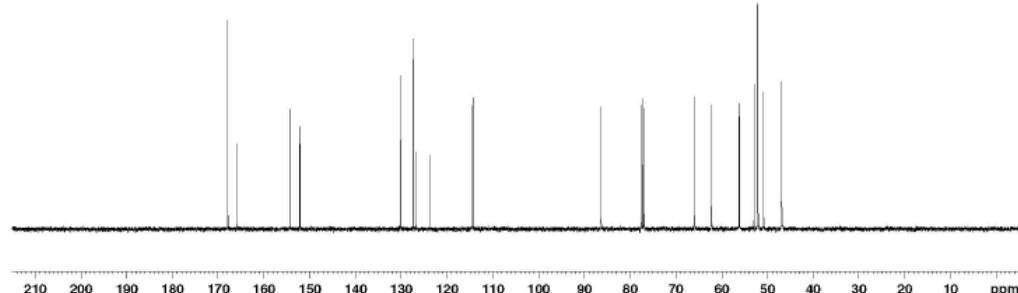

NAME dhc-ps27-20131218  
EXPNO 10  
PROCNO 20131218  
Date\_ 20131218  
Time 9.58  
INSTRUM spect  
PROBHD 5 mm F400  
PULPROG zg30  
TD 65536  
SOLVENT CDCl3  
NS 2  
DS 2  
SWH 8012.820 Hz  
FIDRES 0.122366 Hz  
AQ 4.0894966 sec  
RG 25.2  
DM 62.400 usec  
DE 6.50 usec  
TE 285.3 K  
D1 1.00000000 sec  
D11 1  
TD0 1

===== CHANNEL f1 =====  
SFO1 400.1324710 MHz  
NUC1 1H  
P1 12.00 usec  
PT 65536  
SF 400.1299850 MHz  
WDW EM  
SSB 0  
LB 0.30 Hz  
GB 0  
PC 1.00

7.321  
7.320  
7.297  
7.283  
7.280  
7.255  
7.007  
6.989  
6.972  
6.904  
6.885  
6.893

4.747  
4.645  
4.321  
4.309  
4.294  
3.937  
3.629  
3.137  
3.095  
3.083  
2.641  
2.625  
2.614  
2.491  
2.479  
2.466

0.000

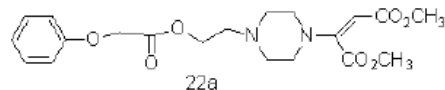

22a

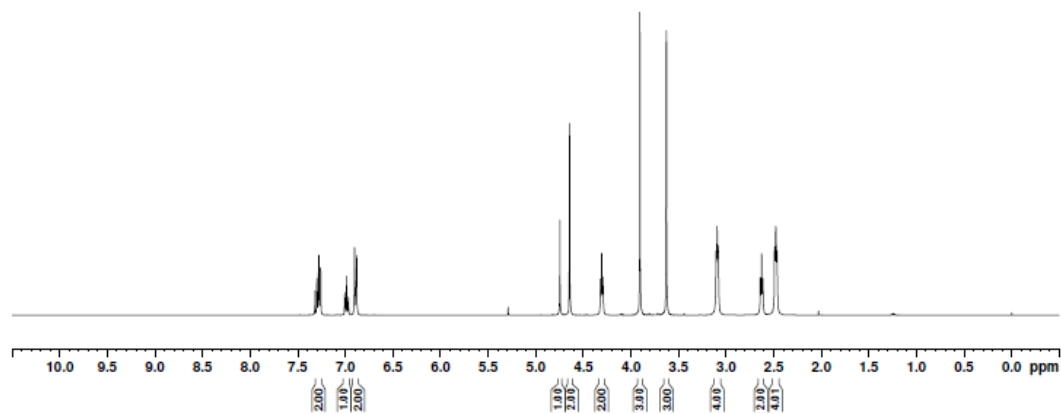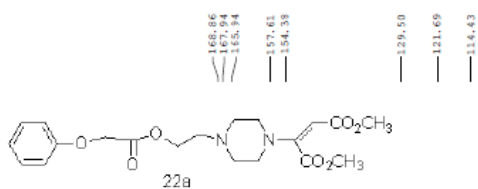

22a

168.86  
167.94  
165.94  
157.61  
154.38  
129.50  
121.69  
114.43

86.23  
77.55  
77.23  
76.74  
65.05  
61.98  
56.52  
52.91  
52.02  
50.85  
46.89

NAME dhc-ps27-20131218  
EXPNO 11  
PROCNO 20131218  
Date\_ 20131218  
Time 10.01  
INSTRUM spect  
PROBHD 5 mm F400  
PULPROG zg30  
TD 65536  
SOLVENT CDCl3  
NS 2  
DS 2  
SWH 24038.461 Hz  
FIDRES 0.368798 Hz  
AQ 1.3631988 sec  
RG 2050  
DM 20.800 usec  
DE 6.50 usec  
TE 297.2 K  
D1 2.00000000 sec  
D11 0.03000000 sec  
TD0 1

===== CHANNEL f1 =====  
SFO1 100.6228298 MHz  
NUC1 13C  
P1 14.45 usec  
PT 32768  
SF 100.6127754 MHz  
WDW EM  
SSB 0  
LB 1.00 Hz  
GB 0  
PC 1.40

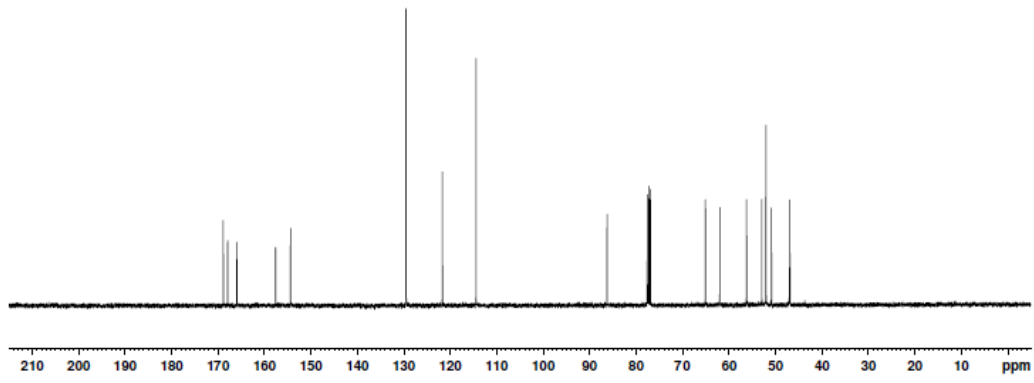

NAME dhx-pd30-n20131218  
EXPNO 1  
PROCNO 1  
Date\_ 20131218  
Time 10.14  
INSTRUM spect  
PROBHD 5 mm PABBO BB/  
PULPROG zgpg30  
TD 65536  
SOLVENT CDCl3  
NS 2  
DS 2  
SWH 800.000 Hz  
FIDRES 0.122268 Hz  
AQ 0.0899966 sec  
RG 16  
CW 62.400 usec  
DE 4.50 usec  
TE 285.0 K  
D1 1.0000000 sec  
TD0

===== CHANNEL f1 =====  
ZFO1 400.1324710 MHz  
NUC1 13  
P1 12.00 usec  
SFO1 400.1299984 MHz  
NUC1 13  
ZG1 0  
LB 0.30 Hz  
GB 0  
PC 1.00

8.338  
8.324  
8.304  
7.802  
7.792  
7.772  
7.514  
7.484  
7.474  
7.458  
7.437  
7.433  
7.288  
7.287  
7.282  
6.663

4.807  
4.688  
4.264  
4.251  
4.238  
3.803  
3.632

2.931  
2.919  
2.918  
2.524  
2.511  
2.506  
2.398  
2.314  
2.302

0.000

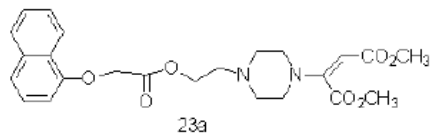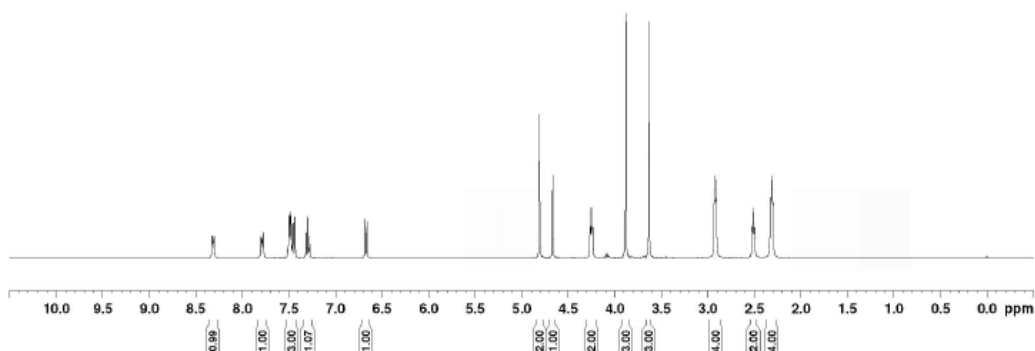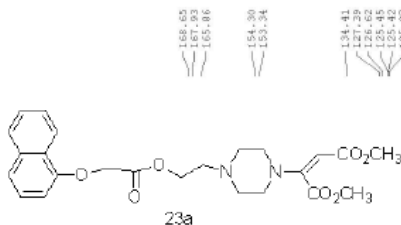

158.65  
158.23  
155.86  
154.30  
153.34

134.41  
127.39  
126.45  
125.42  
125.27  
121.25

194.65

86.11  
77.55  
77.23  
76.91

65.29  
62.31  
56.64  
56.44  
51.94  
50.41  
46.71

NAME dhx-pd30-n20131218  
EXPNO 1  
PROCNO 1  
Date\_ 20131218  
Time 10.17  
INSTRUM spect  
PROBHD 5 mm PABBO BB/  
PULPROG zgpg30  
TD 65536  
SOLVENT CDCl3  
NS 2  
DS 2  
SWH 240.98400 Hz  
FIDRES 0.364798 Hz  
AQ 1.3631988 sec  
RG 2050  
CW 20.800 usec  
DE 4.50 usec  
TE 287.2 K  
D1 2.0000000 sec  
D11 0.0300000 sec  
TD0 1

===== CHANNEL f2 =====  
ZFO1 100.6229290 MHz  
NUC1 13C  
P1 14.45 usec  
SFO1 100.62788 MHz  
NUC1 13C  
ZG1 0  
LB 1.00 Hz  
GB 0  
PC 1.40

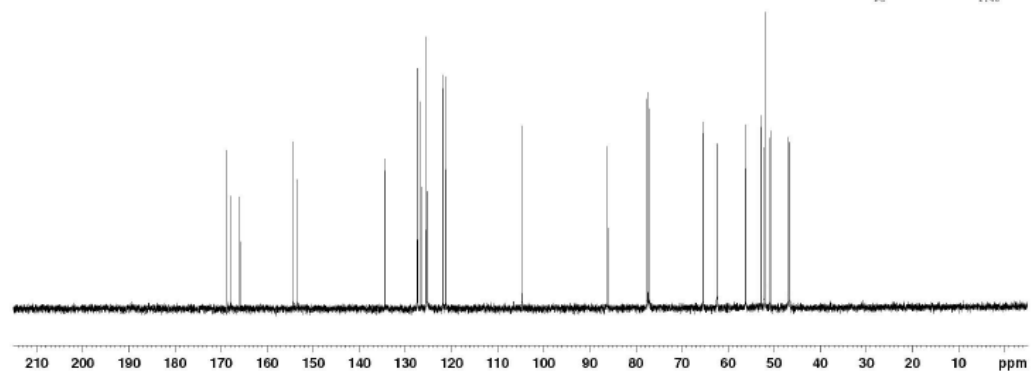

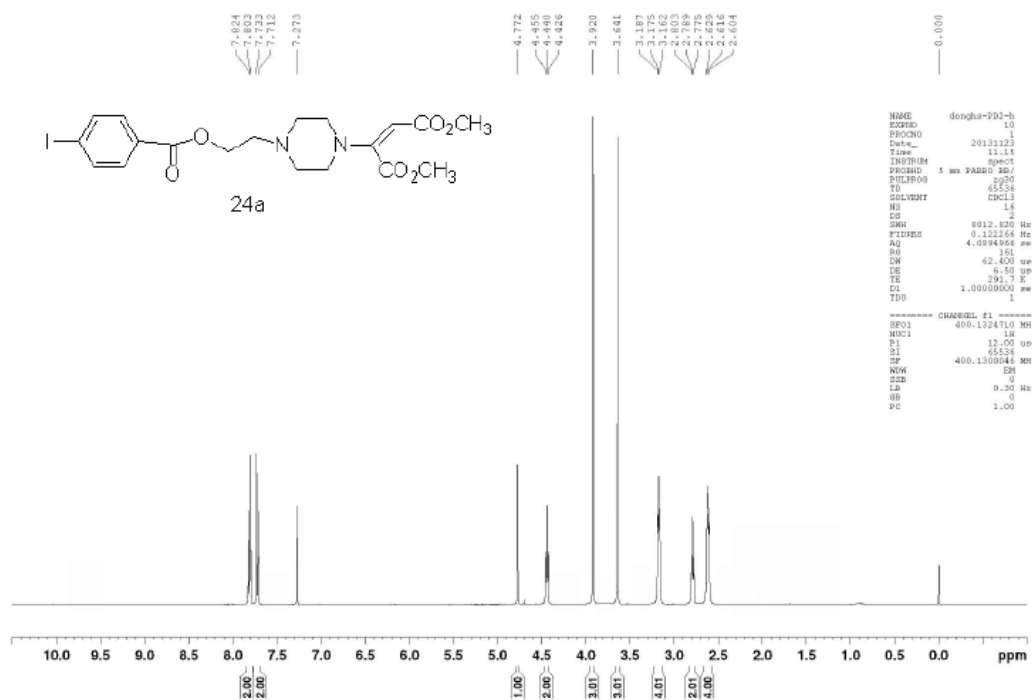

```

NAME      donghua-1001-b
EXPNO     10
PROCNO    1
Date_     20131123
Time      11.15
INSTRUM   spect
PROBHD    5 mm F4000 BBO
PULPROG   zgpg30
TD         65536
SOLVENT   CDCl3
NS         14
DS         2
SWH        8012.820 Hz
FIDRES     0.122166 Hz
AQ         4.0904664 sec
RG         661
CW         62.400 usec
DE         6.50 usec
TE         290.2 K
TR         1.00000000 sec
D1         1
D11        1
D12        1
D13        1
D14        1
D15        1
D16        1
D17        1
D18        1
D19        1
D20        1
D21        1
D22        1
D23        1
D24        1
D25        1
D26        1
D27        1
D28        1
D29        1
D30        1
D31        1
D32        1
D33        1
D34        1
D35        1
D36        1
D37        1
D38        1
D39        1
D40        1
D41        1
D42        1
D43        1
D44        1
D45        1
D46        1
D47        1
D48        1
D49        1
D50        1
D51        1
D52        1
D53        1
D54        1
D55        1
D56        1
D57        1
D58        1
D59        1
D60        1
D61        1
D62        1
D63        1
D64        1
D65        1
D66        1
D67        1
D68        1
D69        1
D70        1
D71        1
D72        1
D73        1
D74        1
D75        1
D76        1
D77        1
D78        1
D79        1
D80        1
D81        1
D82        1
D83        1
D84        1
D85        1
D86        1
D87        1
D88        1
D89        1
D90        1
D91        1
D92        1
D93        1
D94        1
D95        1
D96        1
D97        1
D98        1
D99        1
D100       1
D101       1
D102       1
D103       1
D104       1
D105       1
D106       1
D107       1
D108       1
D109       1
D110       1
D111       1
D112       1
D113       1
D114       1
D115       1
D116       1
D117       1
D118       1
D119       1
D120       1
D121       1
D122       1
D123       1
D124       1
D125       1
D126       1
D127       1
D128       1
D129       1
D130       1
D131       1
D132       1
D133       1
D134       1
D135       1
D136       1
D137       1
D138       1
D139       1
D140       1
D141       1
D142       1
D143       1
D144       1
D145       1
D146       1
D147       1
D148       1
D149       1
D150       1
D151       1
D152       1
D153       1
D154       1
D155       1
D156       1
D157       1
D158       1
D159       1
D160       1
D161       1
D162       1
D163       1
D164       1
D165       1
D166       1
D167       1
D168       1
D169       1
D170       1
D171       1
D172       1
D173       1
D174       1
D175       1
D176       1
D177       1
D178       1
D179       1
D180       1
D181       1
D182       1
D183       1
D184       1
D185       1
D186       1
D187       1
D188       1
D189       1
D190       1
D191       1
D192       1
D193       1
D194       1
D195       1
D196       1
D197       1
D198       1
D199       1
D200       1
D201       1
D202       1
D203       1
D204       1
D205       1
D206       1
D207       1
D208       1
D209       1
D210       1
D211       1
D212       1
D213       1
D214       1
D215       1
D216       1
D217       1
D218       1
D219       1
D220       1
D221       1
D222       1
D223       1
D224       1
D225       1
D226       1
D227       1
D228       1
D229       1
D230       1
D231       1
D232       1
D233       1
D234       1
D235       1
D236       1
D237       1
D238       1
D239       1
D240       1
D241       1
D242       1
D243       1
D244       1
D245       1
D246       1
D247       1
D248       1
D249       1
D250       1
D251       1
D252       1
D253       1
D254       1
D255       1
D256       1
D257       1
D258       1
D259       1
D260       1
D261       1
D262       1
D263       1
D264       1
D265       1
D266       1
D267       1
D268       1
D269       1
D270       1
D271       1
D272       1
D273       1
D274       1
D275       1
D276       1
D277       1
D278       1
D279       1
D280       1
D281       1
D282       1
D283       1
D284       1
D285       1
D286       1
D287       1
D288       1
D289       1
D290       1
D291       1
D292       1
D293       1
D294       1
D295       1
D296       1
D297       1
D298       1
D299       1
D300       1
D301       1
D302       1
D303       1
D304       1
D305       1
D306       1
D307       1
D308       1
D309       1
D310       1
D311       1
D312       1
D313       1
D314       1
D315       1
D316       1
D317       1
D318       1
D319       1
D320       1
D321       1
D322       1
D323       1
D324       1
D325       1
D326       1
D327       1
D328       1
D329       1
D330       1
D331       1
D332       1
D333       1
D334       1
D335       1
D336       1
D337       1
D338       1
D339       1
D340       1
D341       1
D342       1
D343       1
D344       1
D345       1
D346       1
D347       1
D348       1
D349       1
D350       1
D351       1
D352       1
D353       1
D354       1
D355       1
D356       1
D357       1
D358       1
D359       1
D360       1
D361       1
D362       1
D363       1
D364       1
D365       1
D366       1
D367       1
D368       1
D369       1
D370       1
D371       1
D372       1
D373       1
D374       1
D375       1
D376       1
D377       1
D378       1
D379       1
D380       1
D381       1
D382       1
D383       1
D384       1
D385       1
D386       1
D387       1
D388       1
D389       1
D390       1
D391       1
D392       1
D393       1
D394       1
D395       1
D396       1
D397       1
D398       1
D399       1
D400       1
D401       1
D402       1
D403       1
D404       1
D405       1
D406       1
D407       1
D408       1
D409       1
D410       1
D411       1
D412       1
D413       1
D414       1
D415       1
D416       1
D417       1
D418       1
D419       1
D420       1
D421       1
D422       1
D423       1
D424       1
D425       1
D426       1
D427       1
D428       1
D429       1
D430       1
D431       1
D432       1
D433       1
D434       1
D435       1
D436       1
D437       1
D438       1
D439       1
D440       1
D441       1
D442       1
D443       1
D444       1
D445       1
D446       1
D447       1
D448       1
D449       1
D450       1
D451       1
D452       1
D453       1
D454       1
D455       1
D456       1
D457       1
D458       1
D459       1
D460       1
D461       1
D462       1
D463       1
D464       1
D465       1
D466       1
D467       1
D468       1
D469       1
D470       1
D471       1
D472       1
D473       1
D474       1
D475       1
D476       1
D477       1
D478       1
D479       1
D480       1
D481       1
D482       1
D483       1
D484       1
D485       1
D486       1
D487       1
D488       1
D489       1
D490       1
D491       1
D492       1
D493       1
D494       1
D495       1
D496       1
D497       1
D498       1
D499       1
D500       1
D501       1
D502       1
D503       1
D504       1
D505       1
D506       1
D507       1
D508       1
D509       1
D510       1
D511       1
D512       1
D513       1
D514       1
D515       1
D516       1
D517       1
D518       1
D519       1
D520       1
D521       1
D522       1
D523       1
D524       1
D525       1
D526       1
D527       1
D528       1
D529       1
D530       1
D531       1
D532       1
D533       1
D534       1
D535       1
D536       1
D537       1
D538       1
D539       1
D540       1
D541       1
D542       1
D543       1
D544       1
D545       1
D546       1
D547       1
D548       1
D549       1
D550       1
D551       1
D552       1
D553       1
D554       1
D555       1
D556       1
D557       1
D558       1
D559       1
D560       1
D561       1
D562       1
D563       1
D564       1
D565       1
D566       1
D567       1
D568       1
D569       1
D570       1
D571       1
D572       1
D573       1
D574       1
D575       1
D576       1
D577       1
D578       1
D579       1
D580       1
D581       1
D582       1
D583       1
D584       1
D585       1
D586       1
D587       1
D588       1
D589       1
D590       1
D591       1
D592       1
D593       1
D594       1
D595       1
D596       1
D597       1
D598       1
D599       1
D600       1
D601       1
D602       1
D603       1
D604       1
D605       1
D606       1
D607       1
D608       1
D609       1
D610       1
D611       1
D612       1
D613       1
D614       1
D615       1
D616       1
D617       1
D618       1
D619       1
D620       1
D621       1
D622       1
D623       1
D624       1
D625       1
D626       1
D627       1
D628       1
D629       1
D630       1
D631       1
D632       1
D633       1
D634       1
D635       1
D636       1
D637       1
D638       1
D639       1
D640       1
D641       1
D642       1
D643       1
D644       1
D645       1
D646       1
D647       1
D648       1
D649       1
D650       1
D651       1
D652       1
D653       1
D654       1
D655       1
D656       1
D657       1
D658       1
D659       1
D660       1
D661       1
D662       1
D663       1
D664       1
D665       1
D666       1
D667       1
D668       1
D669       1
D670       1
D671       1
D672       1
D673       1
D674       1
D675       1
D676       1
D677       1
D678       1
D679       1
D680       1
D681       1
D682       1
D683       1
D684       1
D685       1
D686       1
D687       1
D688       1
D689       1
D690       1
D691       1
D692       1
D693       1
D694       1
D695       1
D696       1
D697       1
D698       1
D699       1
D700       1
D701       1
D702       1
D703       1
D704       1
D705       1
D706       1
D707       1
D708       1
D709       1
D710       1
D711       1
D712       1
D713       1
D714       1
D715       1
D716       1
D717       1
D718       1
D719       1
D720       1
D721       1
D722       1
D723       1
D724       1
D725       1
D726       1
D727       1
D728       1
D729       1
D730       1
D731       1
D732       1
D733       1
D734       1
D735       1
D736       1
D737       1
D738       1
D739       1
D740       1
D741       1
D742       1
D743       1
D744       1
D745       1
D746       1
D747       1
D748       1
D749       1
D750       1
D751       1
D752       1
D753       1
D754       1
D755       1
D756       1
D757       1
D758       1
D759       1
D760       1
D761       1
D762       1
D763       1
D764       1
D765       1
D766       1
D767       1
D768       1
D769       1
D770       1
D771       1
D772       1
D773       1
D774       1
D775       1
D776       1
D777       1
D778       1
D779       1
D780       1
D781       1
D782       1
D783       1
D784       1
D785       1
D786       1
D787       1
D788       1
D789       1
D790       1
D791       1
D792       1
D793       1
D794       1
D795       1
D796       1
D797       1
D798       1
D799       1
D800       1
D801       1
D802       1
D803       1
D804       1
D805       1
D806       1
D807       1
D808       1
D809       1
D810       1
D811       1
D812       1
D813       1
D814       1
D815       1
D816       1
D817       1
D818       1
D819       1
D820       1
D821       1
D822       1
D823       1
D824       1
D825       1
D826       1
D827       1
D828       1
D829       1
D830       1
D831       1
D832       1
D833       1
D834       1
D835       1
D836       1
D837       1
D838       1
D839       1
D840       1
D841       1
D842       1
D843       1
D844       1
D845       1
D846       1
D847       1
D848       1
D849       1
D850       1
D851       1
D852       1
D853       1
D854       1
D855       1
D856       1
D857       1
D858       1
D859       1
D860       1
D861       1
D862       1
D863       1
D864       1
D865       1
D866       1
D867       1
D868       1
D869       1
D870       1
D871       1
D872       1
D873       1
D874       1
D875       1
D876       1
D877       1
D878       1
D879       1
D880       1
D881       1
D882       1
D883       1
D884       1
D885       1
D886       1
D887       1
D888       1
D889       1
D890       1
D891       1
D892       1
D893       1
D894       1
D895       1
D896       1
D897       1
D898       1
D899       1
D900       1
D901       1
D902       1
D903       1
D904       1
D905       1
D906       1
D907       1
D908       1
D909       1
D910       1
D911       1
D912       1
D913       1
D914       1
D915       1
D916       1
D917       1
D918       1
D919       1
D920       1
D921       1
D922       1
D923       1
D924       1
D925       1
D926       1
D927       1
D928       1
D929       1
D930       1
D931       1
D932       1
D933       1
D934       1
D935       1
D936       1
D937       1
D938       1
D939       1
D940       1
D941       1
D942       1
D943       1
D944       1
D945       1
D946       1
D947       1
D948       1
D949       1
D950       1
D951       1
D952       1
D953       1
D954       1
D955       1
D956       1
D957       1
D958       1
D959       1
D960       1
D961       1
D962       1
D963       1
D964       1
D965       1
D966       1
D967       1
D968       1
D969       1
D970       1
D971       1
D972       1
D973       1
D974       1
D975       1
D976       1
D977       1
D978       1
D979       1
D980       1
D981       1
D982       1
D983       1
D984       1
D985       1
D986       1
D987       1
D988       1
D989       1
D990       1
D991       1
D992       1
D993       1
D994       1
D995       1
D996       1
D997       1
D998       1
D999       1
D1000       1

```

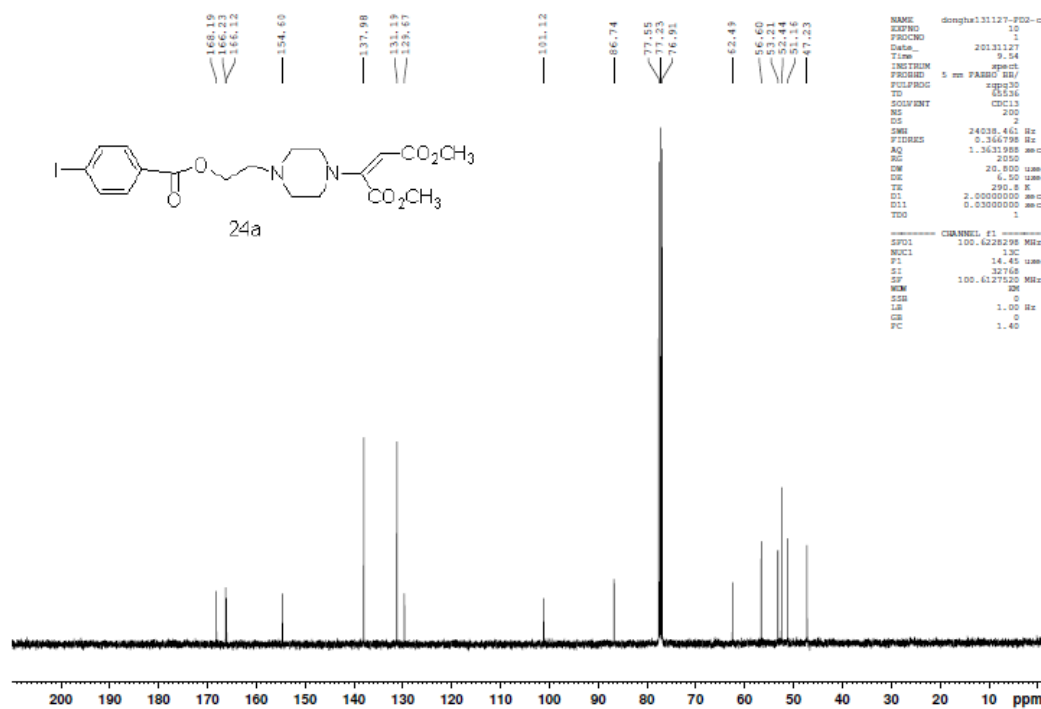

```

NAME      donghua131127-102-c
EXPNO     10
PROCNO    1
Date_     20131127
Time      9.54
INSTRUM   spect
PROBHD    5 mm F4000 BBO
PULPROG   zgpg30
TD         65536
SOLVENT   CDCl3
NS         14
DS         2
SWH        24038.461 Hz
FIDRES     0.366798 Hz
AQ         1.3631988 sec
RG         2500
CW         25.600 usec
DE         6.50 usec
TE         290.2 K
TR         2.00000000 sec
D1         0.33000000 sec
D11        1
D12        1
D13        1
D14        1
D15        1
D16        1
D17        1
D18        1
D19        1
D20        1
D21        1
D22        1
D23        1
D24        1
D25        1
D26        1
D27        1
D28        1
D29        1
D30        1
D31        1
D32        1
D33        1
D34        1
D35        1
D36        1
D37        1
D38        1
D39        1
D40        1
D41        1
D42        1
D43        1
D44        1
D45        1
D46        1
D47        1
D48        1
D49        1
D50        1
D51        1
D52        1
D53        1
D54        1
D55        1
D56        1
D57        1
D58        1
D59        1
D60        1
D61        1
D62        1
D63        1
D64        1
D65        1
D66        1
D67        1
D68        1
D69        1
D70        1
D71        1
D72        1
D73        1
D74        1
D75        1
D76        1
D77        1
D78        1
D79        1
D80        1
D81        1
D82        1
D83        1
D84        1
D85        1
D86        1
D87        1
D88        1
D89        1
D90        1
D91        1
D92        1
D93        1
D94        1
D95        1
D96        1
D97        1
D98        1
D99        1
D100       1
D101       1
D102       1
D103       1
D104       1
D105       1
D106       1
D107       1
D108       1
D109       1
D110       1
D111       1
D112       1
D113       1
D114       1
D115       1
D116       1
D117       1
D118       1
D119       1
D120       1
D121       1
D122       1
D123       1
D124       1
D125       1
D126       1
D127       1
D128       1
D129       1
D130       1
D131       1
D132       1
D133       1
D134       1
D135       1
D136       1
D137       1
D138       1
D139       1
D140       1
D141       1
D142       1
D143       1
D144       1
D145       1
D146       1
D147       1
D148       1
D149       1
D150       1
D151       1
D152       1
D153       1
D154       1
D155       1
D156       1
D157       1
D158       1
D159       1
D160       1
D161       1
D162       1
D163       1
D164       1
D165       1
D166       1
D167       1
D168       1
D169       1
D170       1
D171       1
D172       1
D173       1
D174       1
D175       1
D176       1
D177       1
D178       1
D179       1
D180       1
D181       1
D182       1
D183       1
D184       1
D185       1
D186       1
D187       1
D188       1
D189       1
D190       1
D191       1
D192       1
D193       1
D194       1
D195       1
D196       1
D197       1
D198       1
D199       1
D200       1
D201       1
D202       1
D203       1
D204       1
D205       1
D206       1
D207       1
D208       1
D209       1
D210       1
D211       1
D212       1
D213       1
D214       1
D215       1
D216       1
D217       1
D218       1
D219       1
D220       1
D221       1
D222       1
D223       1
D224       1
D225       1
D226       1
D227       1
D228       1
D229       1
D230       1
D231       1
D232       1
D233       1
D234       1
D235       1
D236       1
D237       1
D238       1
D239       1
D240       1
D241       1
D242       1
D243       1
D244       1
D245       1
D246       1
D247       1
D248       1
D249       1
D250       1
D251       1
D252       1
D253       1
D254       1
D255       1
D256       1
D257       1
D258       1
D259       1
D260       1
D261       1
D262       1
D263       1
D264       1
D265       1
D266       1
D267       1
D268       1
D269       1
D270       1
D271       1
D272       1
D273       1
D274       1
D275       1
D276       1
D277       1
D278       1
D279       1
D280       1
D281       1
D282       1
D283       1
D284       1
D285       1
D286       1
D287       1
D288       1
D289       1
D290       1
D291       1
D292       1
D293       1
D294       1
D295       1
D296       1
D297       1
D298       1
D299       1
D300       1
D301       1
D302       1
D303       1
D304       1
D305       1
D306       1
D307       1
D308       1
D309       1
D310       1
D311       1
D312       1
D313       1
D314       1
D315       1
D316       1
D317       1
D318       1
D319       1
D320       1
D321       1
D322       1
D323       1
D324       1
D325       1
D326       1
D327       1
D328       1
D329       1
D330       1
D331       1
```

NAME chr-pd40-020131214  
EXPNO 1  
PROCNO 1  
Date\_ 20131214  
Time 17.09  
INSTRUM spect  
PROBHD 5 mm PABBO BB/  
PULPROG zgpg30  
TD 65536  
SOLVENT CDCl3  
NS 16  
DS 2  
SWH 8013.820 Hz  
FIDRES 0.122566 Hz  
AQ 4.0894966 sec  
RG 51  
CW 62.400 usec  
DE 6.50 usec  
TE 297.0 K  
D1 1.00000000 sec  
TD0 1

===== CHANNEL f1 =====  
SFO1 400.1324710 MHz  
NUC1 1H  
P1 14.10 usec  
PL 0.00 dB  
SFO2 400.1299940 MHz  
NUC2 1H  
P2 14.10 usec  
PL 0.00 dB  
PC 1.00

8.002  
7.982  
7.779  
7.775  
7.755  
7.436  
7.414  
7.411  
7.415  
7.399  
7.396  
7.297  
7.192  
7.188  
7.169  
7.154  
7.150

4.773  
4.671  
4.653  
3.820  
3.638  
3.188  
3.186  
3.173  
2.911  
2.903  
2.633  
2.620  
2.608

0.000

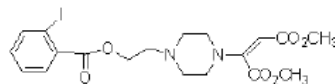

25a

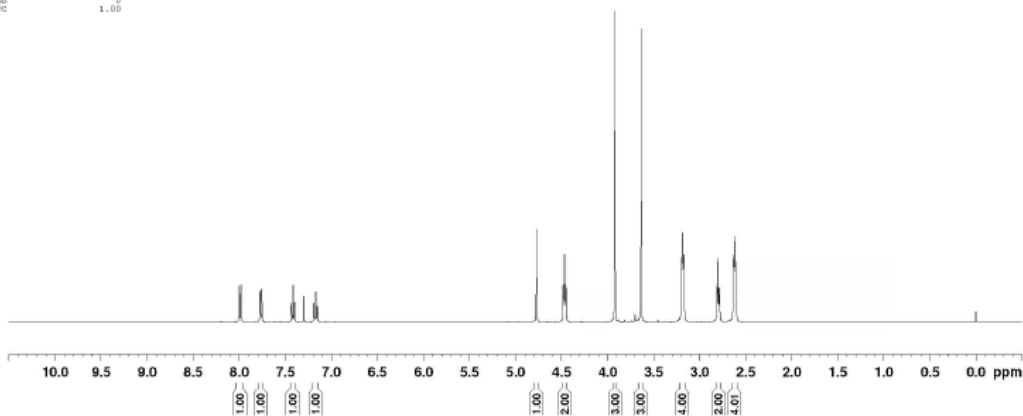

168.13  
166.18  
166.16  
154.55  
141.38  
135.19  
132.05  
130.96  
128.07

94.18  
86.47  
78.55  
77.23  
76.91  
62.50  
56.42  
53.13  
51.06  
47.17

NAME chr-pd40-020131214  
EXPNO 1  
PROCNO 1  
Date\_ 20131214  
Time 17.09  
INSTRUM spect  
PROBHD 5 mm PABBO BB/  
PULPROG zgpg30  
TD 65536  
SOLVENT CDCl3  
NS 16  
DS 2  
SWH 24038.461 Hz  
FIDRES 0.344798 Hz  
AQ 1.3621988 sec  
RG 645  
CW 20.000 usec  
DE 6.50 usec  
TE 298.2 K  
D1 2.00000000 sec  
D11 0.03000000 sec  
TD0 1

===== CHANNEL f1 =====  
SFO1 100.6220200 MHz  
NUC1 13C  
P1 12.00 usec  
PL 0.00 dB  
SFO2 100.6127600 MHz  
NUC2 13C  
P2 12.00 usec  
PL 0.00 dB  
PC 1.00

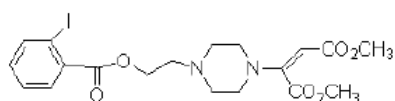

25a

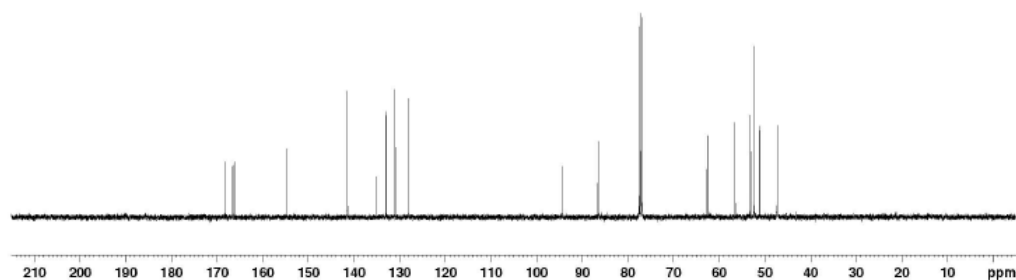

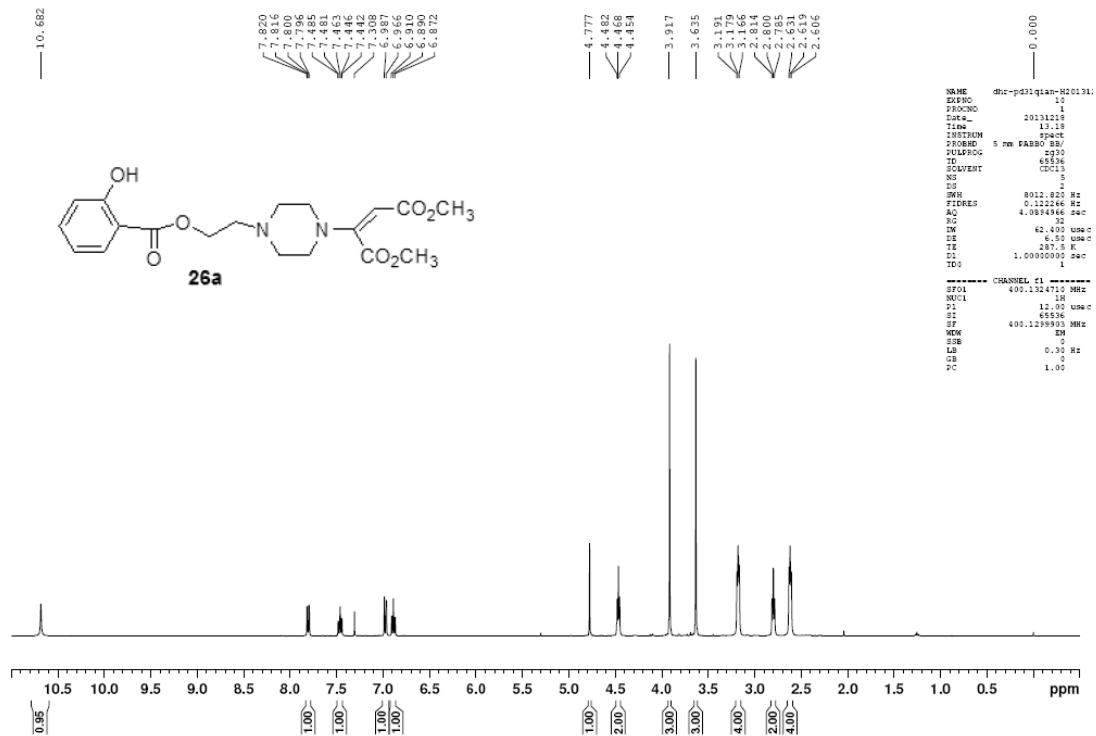

NAME dhr-pd50-1w20140607  
 EXPNO 10  
 PROCNO 1  
 Date\_ 20140607  
 Time 11:21  
 INSTRUM spect  
 PROBRD 5 mm F400 BBO  
 PULPROG zgpg30  
 TO 25536  
 SOLVENT CDCl3  
 NS 2  
 DS 2  
 SFO1 801.026000 Hz  
 FIDRES 0.122266 Hz  
 AQ 9.0694966 sec  
 RG 324  
 DM 62.800 usec  
 DE 6.50 usec  
 TE 297.4 K  
 D1 1.00000000 sec  
 D11 1  
 TDO 1

----- CHANNEL f1 -----  
 SFO1 400.1324710 MHz  
 NUC1 1H  
 P1 11.60 usec  
 PL 0.00 dB  
 SFO 400.1301049 MHz  
 NS 2  
 DS 2  
 LB 0.30 Hz  
 GB 0  
 PC 1.00

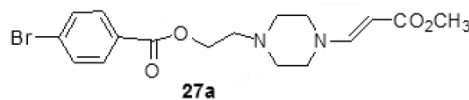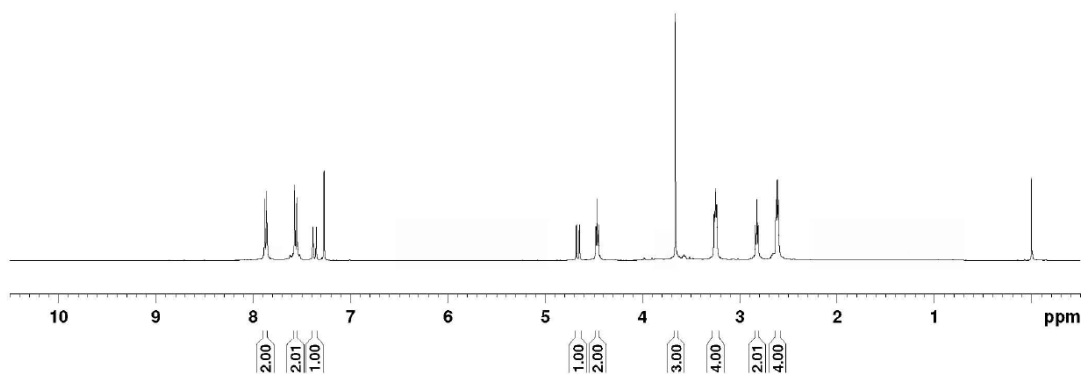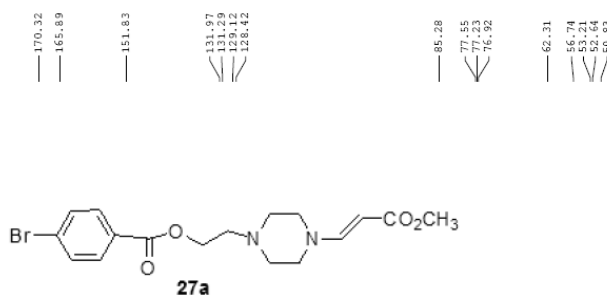

NAME dhr-pd50-1c20140607  
 EXPNO 11  
 PROCNO 1  
 Date\_ 20140607  
 Time 11:39  
 INSTRUM spect  
 PROBRD 5 mm F400 BBO  
 PULPROG zgpg30  
 TO 25536  
 SOLVENT CDCl3  
 NS 2  
 DS 2  
 SFO1 24039.461 Hz  
 FIDRES 0.366798 Hz  
 AQ 1.3631989 sec  
 RG 3080  
 DM 20.800 usec  
 DE 6.50 usec  
 TE 297.4 K  
 D1 2.00000000 sec  
 D11 0.03000000 sec  
 TDO 1

\*\*\*\*\* CHANNEL f1 \*\*\*\*\*  
 SFO1 100.622498 MHz  
 NUC1 13C  
 P1 14.45 usec  
 PL 0.00 dB  
 SFO 100.6127490 MHz  
 NS 2  
 DS 2  
 LB 1.00 Hz  
 GB 0  
 PC 1.40

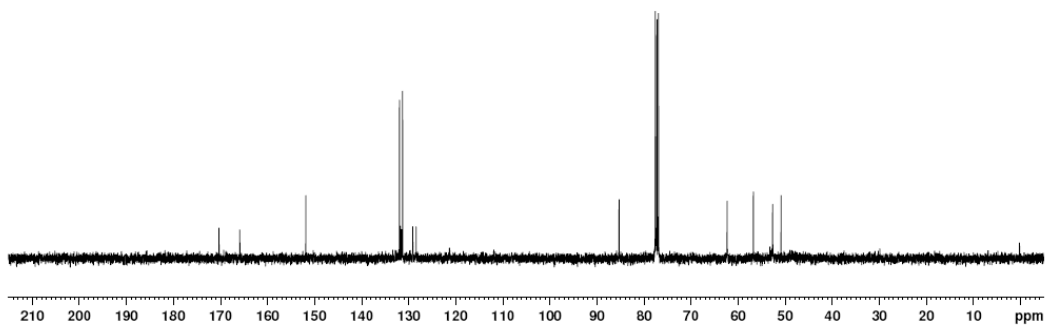



NAME chr-p-051-20190523  
 INFO 10  
 PROCD 1  
 Date\_ 20190523  
 Time 11:13  
 INSTRUM spect  
 PROBHD 5 mm PABBO BBO  
 PULPROG zgpg30  
 ID 65536  
 SOLVENT DMSO  
 NS 10  
 DS 2  
 SWH 8012.820 Hz  
 FIDRES 0.122466 Hz  
 AQ 4.0934966 sec  
 PC 123  
 HU 62.100 Vpp  
 IE 6.50 Vpp  
 IS 235.4 Hz  
 FI 1.0000000 sec  
 TD 1

===== CHANNEL f1 =====  
 F1 900.1254710 MHz  
 H1 1H  
 P1 14.10 Vpp  
 S1 65536  
 SF 900.1250996 MHz  
 G4 0  
 S2 0.30 Hz  
 IS 0  
 PC 1.00

7.893  
7.872  
7.599  
7.576  
7.374  
7.341  
7.273

4.673  
4.640  
4.463  
4.449  
4.435  
4.155  
4.137  
4.120  
4.102  
3.243  
3.231  
3.218  
2.813  
2.798  
2.784  
2.596  
2.583  
2.571

1.269  
1.251  
1.233

0.000

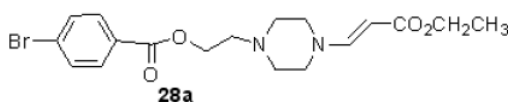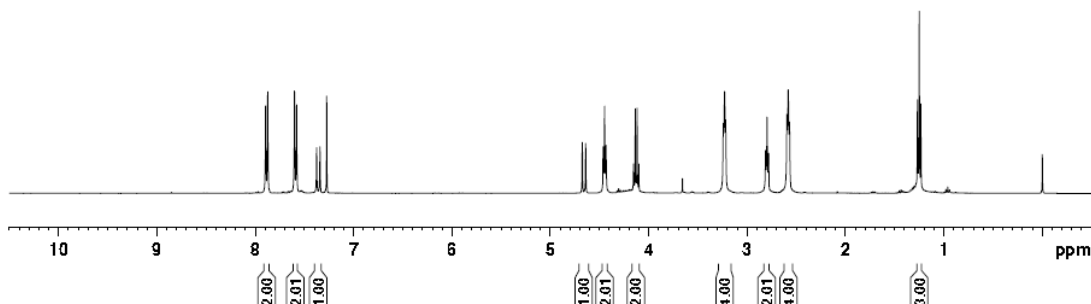

NAME chr-p-051-20190523  
 INFO 10  
 PROCD 1  
 Date\_ 20190523  
 Time 11:20  
 INSTRUM spect  
 PROBHD 5 mm PABBO BBO  
 PULPROG zgpg30  
 ID 65536  
 SOLVENT DMSO  
 NS 65  
 DS 2  
 SWH 24038.461 Hz  
 FIDRES 0.354738 Hz  
 AQ 1.265145 sec  
 PC 575  
 HU 20.000 Vpp  
 IE 6.50 Vpp  
 IS 237.5 Hz  
 FI 2.0000000 sec  
 TD 0.0200000 sec  
 TD 1

===== CHANNEL f1 =====  
 F1 100.6228230 MHz  
 H1 13C  
 P1 12.00 Vpp  
 S1 32768  
 SF 100.6127938 MHz  
 G4 0  
 S2 0  
 IS 1.00 Hz  
 PC 1.40

159.88  
155.88  
151.70

131.98  
131.29  
129.18  
126.40

85.64  
77.55  
77.23  
76.91

82.54  
59.21  
56.78  
52.74

14.80

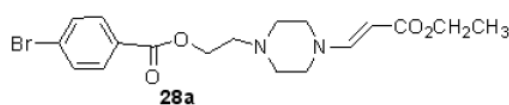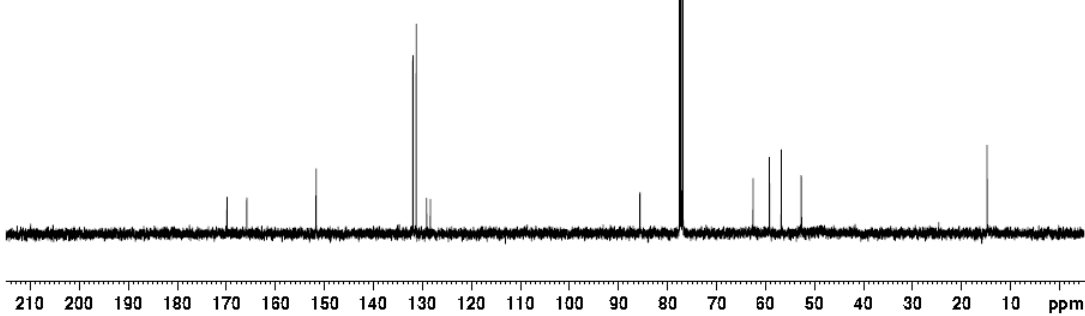

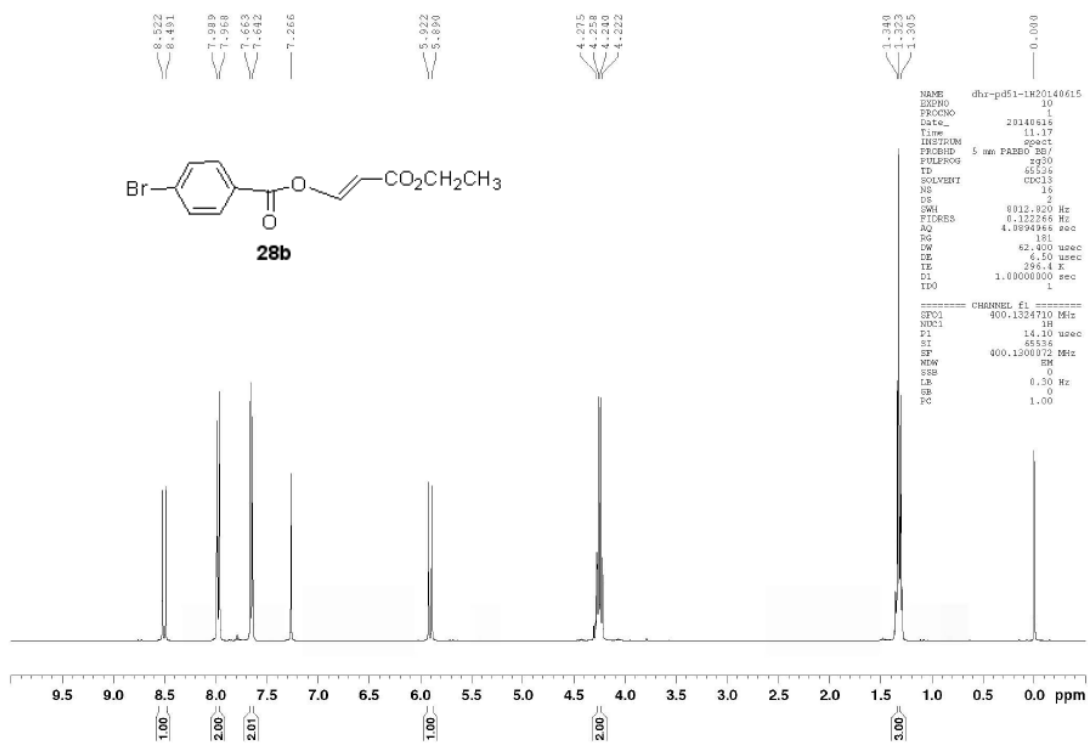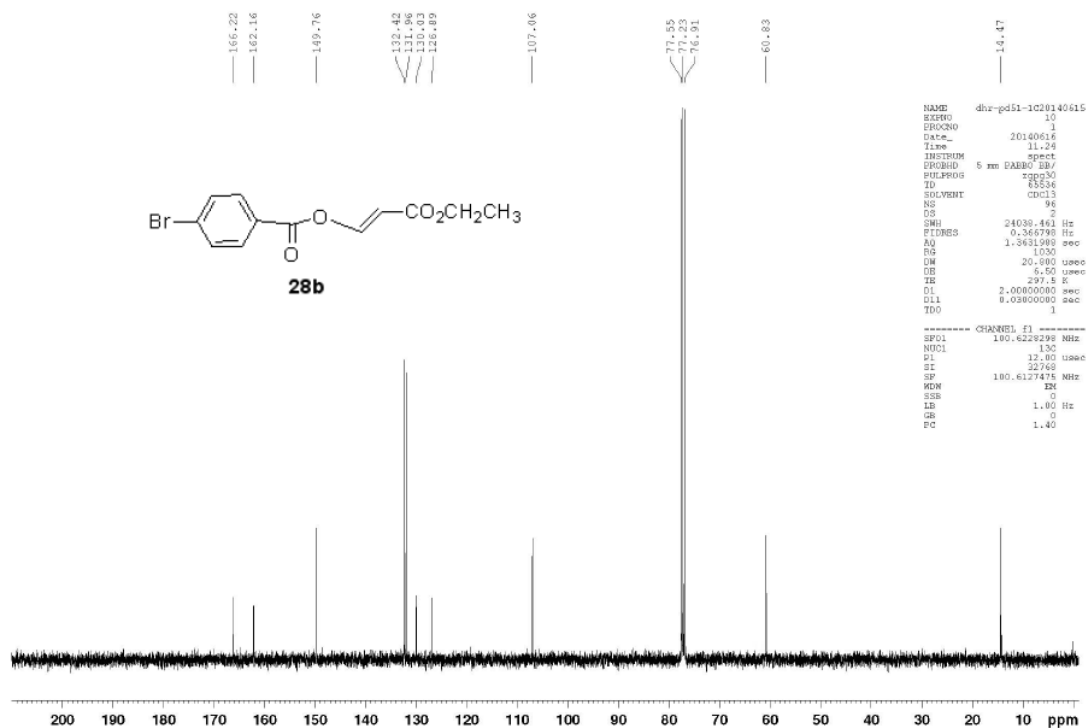

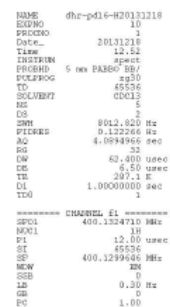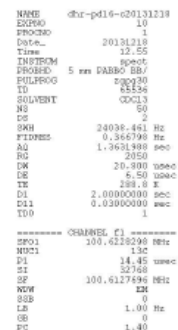

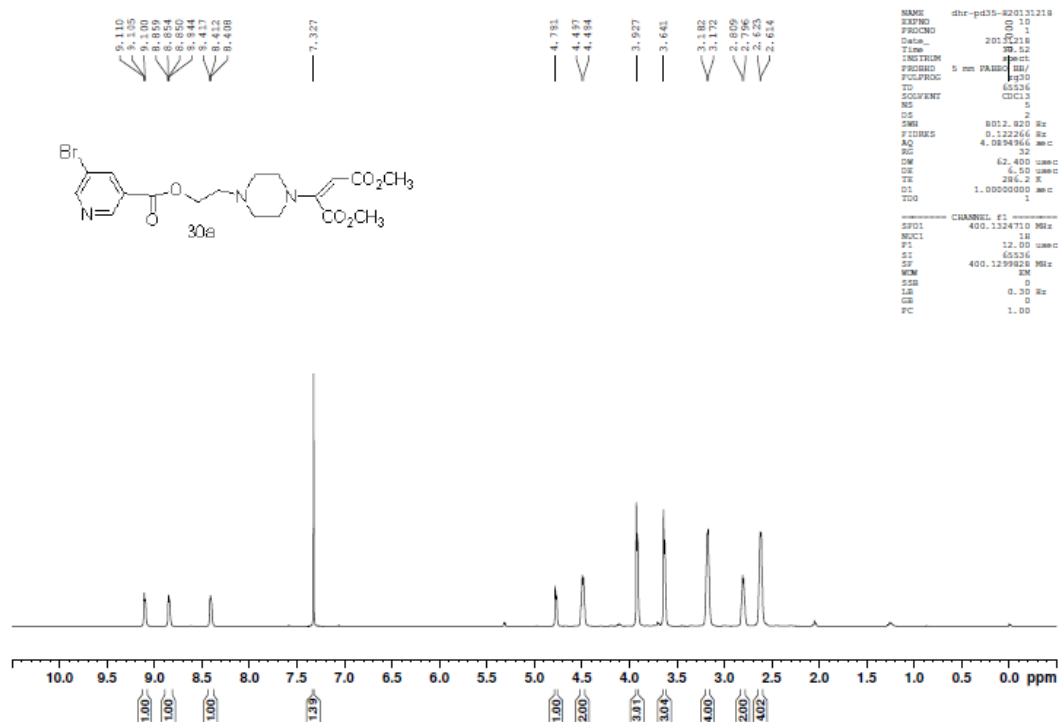

```

NAME      chr-pd35-820131218
EXPNO     1
PROCNO    1
Data_     20131218
Time      30.52
INSTRUM   spect
PROBHD    5 mm PABBO
PULPROG   zgpg30
TD         65536
SOLVENT   CDCl3
NS         5
DS         2
SWH        8012.820 Hz
FIDRES     0.122266 Hz
AQ         4.0819466 sec
RG         32
DM         62.400 umsec
DE         6.50 umsec
TE         298.2 K
D1         1.00000000 sec
D11        1
TDO        1
===== CHANNEL f1 =====
SFO1      400.1324710 MHz
NUC1       1H
P1         12.00 umsec
SI         65536
SF         400.1299828 MHz
WDM        DM
SSB         0
LB         0.30 Hz
GB         0
PC         1.00

```

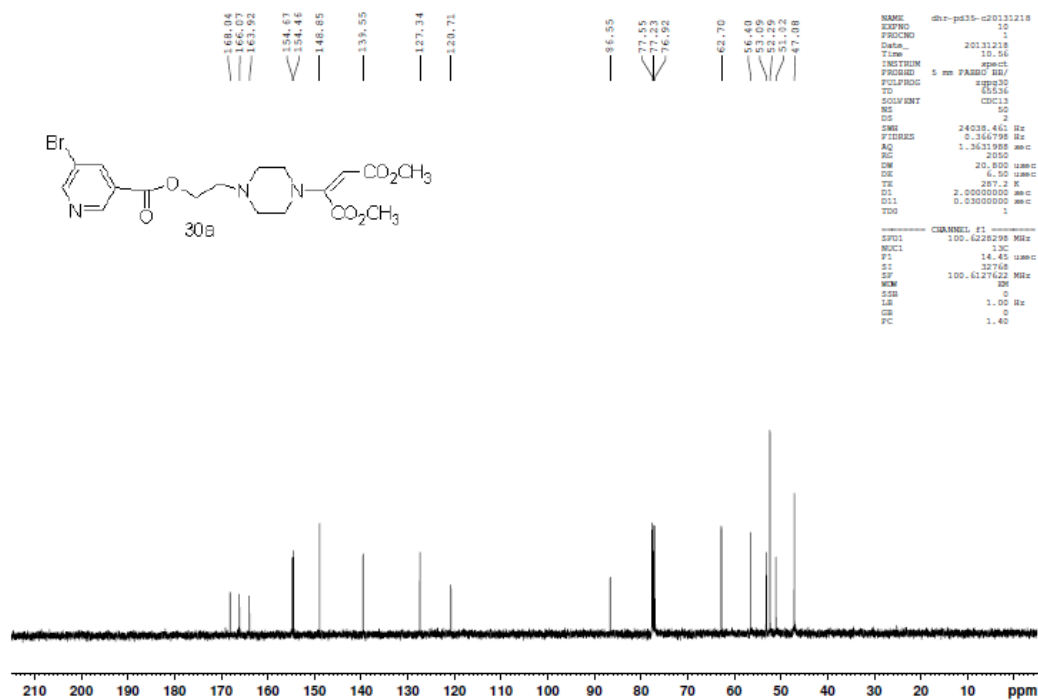

```

NAME      chr-pd35-c20131218
EXPNO     1
PROCNO    1
Data_     20131218
Time      10.54
INSTRUM   spect
PROBHD    5 mm PABBO
PULPROG   zgpg30
TD         65536
SOLVENT   CDCl3
NS         5
DS         2
SWH        24038.460 Hz
FIDRES     0.346799 Hz
AQ         1.3631985 sec
RG         2050
DM         20.800 umsec
DE         6.50 umsec
TE         287.2 K
D1         2.00000000 sec
D11        0.03000000 sec
TDO        1
===== CHANNEL f1 =====
SFO1      100.6228298 MHz
NUC1       13C
P1         14.40 umsec
SI         32768
SF         100.6127622 MHz
WDM        DM
SSB         0
LB         1.00 Hz
GB         0
PC         1.40

```



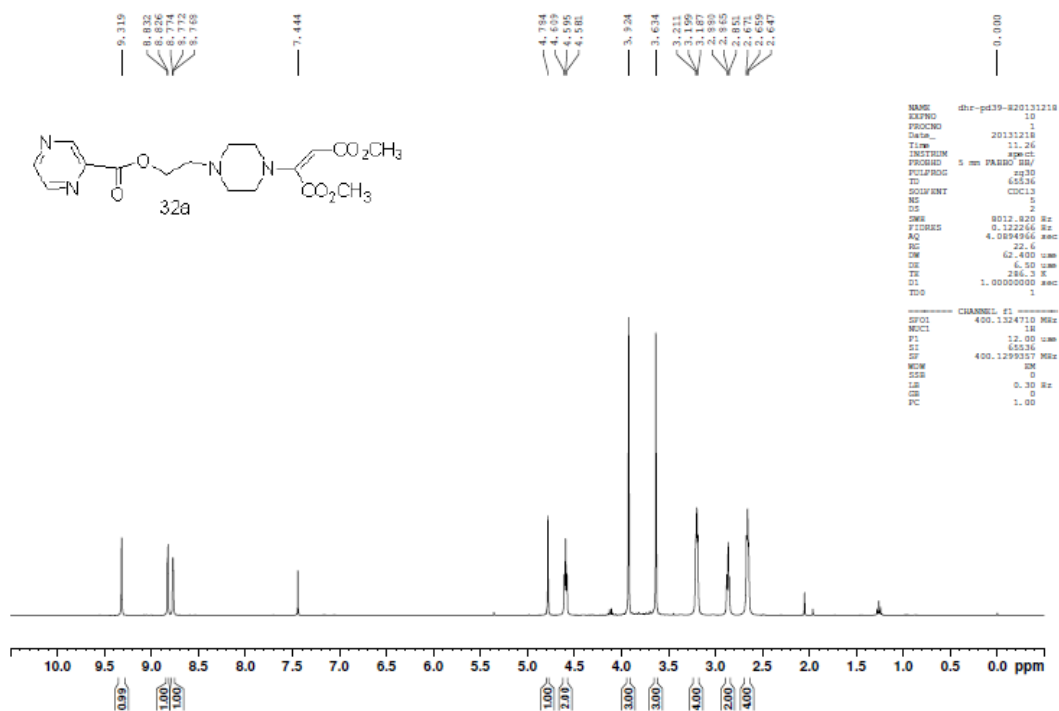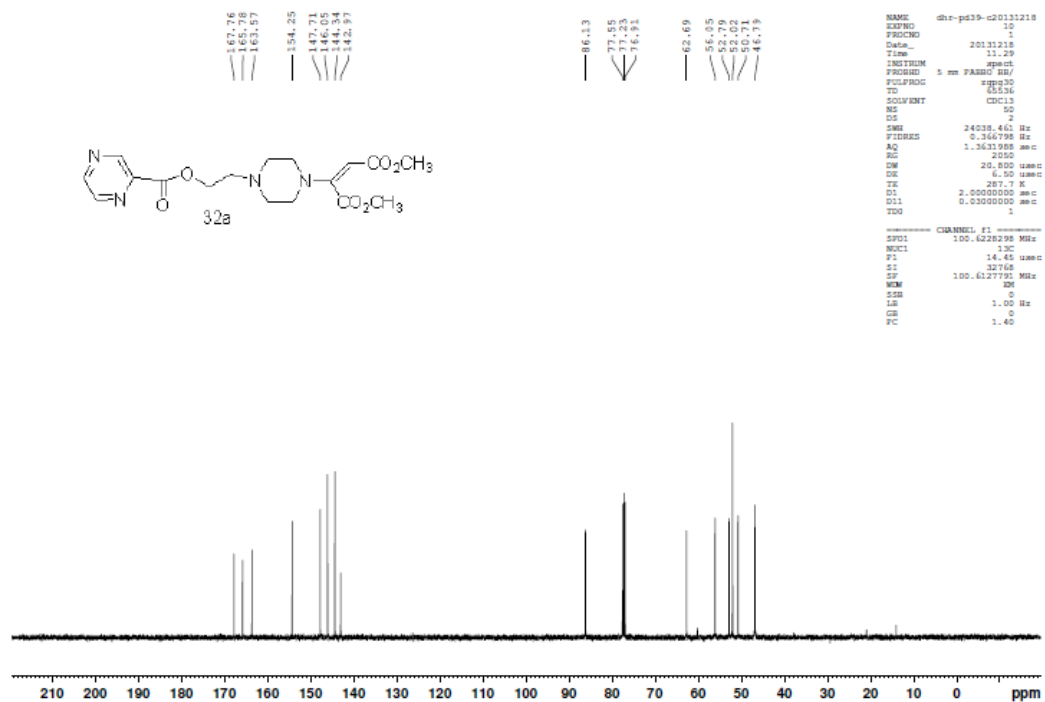



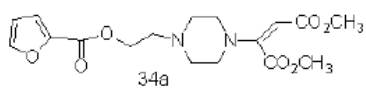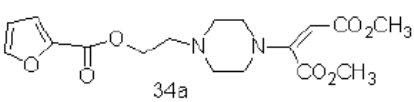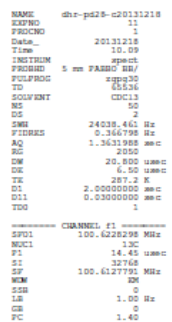



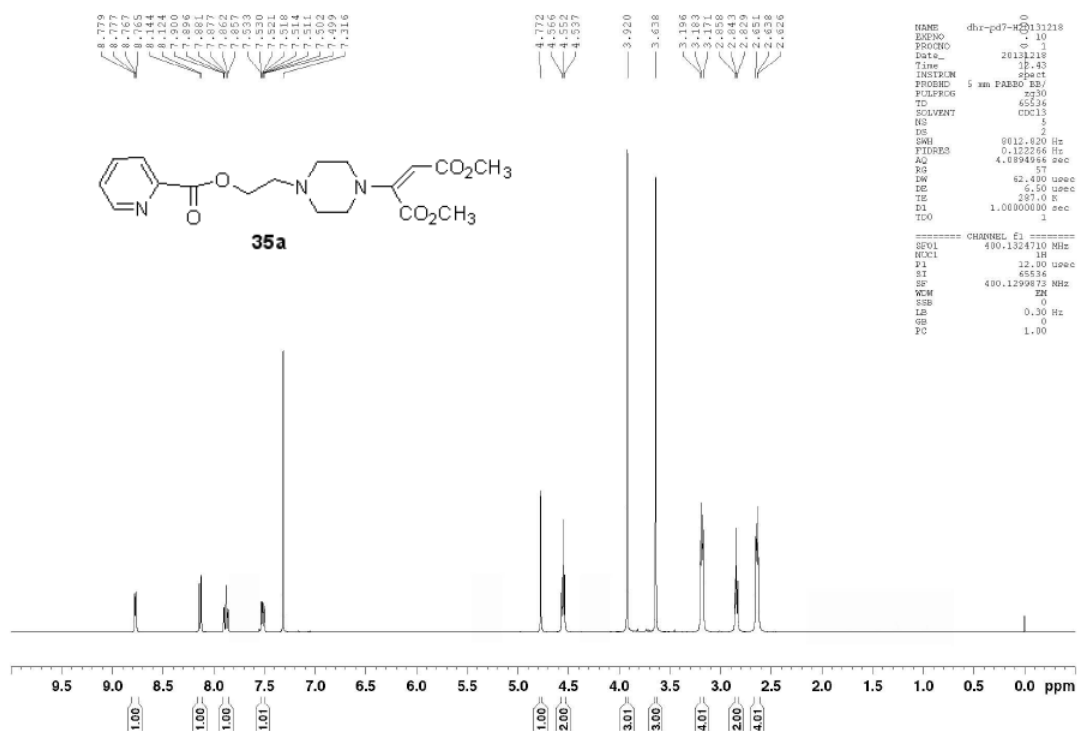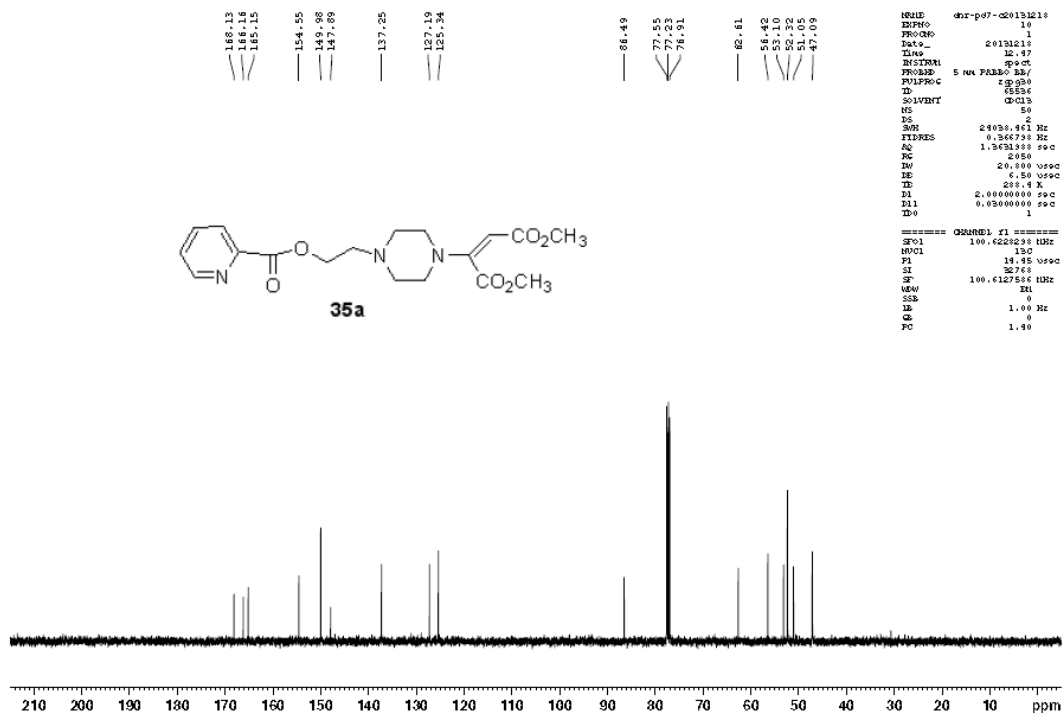

NAME dhr-pd46-H20140505  
 EXPNO 10  
 PROCNO 1  
 Date\_ 20140505  
 Time 10.52  
 INSTRUM spect  
 PROBRD 5 mm PABBO BB/  
 PULPROG zgpg30  
 TD 65536  
 SOLVENT CDCl3  
 NS 16  
 DS 2  
 SWH 8012.820 Hz  
 FIDRES 0.122266 Hz  
 AQ 4.0894966 sec  
 RG 114  
 DW 62.400 usec  
 DE 6.50 usec  
 TE 292.9 K  
 D1 1.00000000 sec  
 D11 1  
 TD0 1

===== CHANNEL f1 =====  
 SFO1 400.1324710 MHz  
 NUCL 1H  
 P1 14.10 usec  
 SI 65536  
 SF 400.1299992 MHz  
 NDW EM  
 SSB 0  
 LB 0.30 Hz  
 GB 0  
 PC 1.00

7.883  
 7.561  
 7.438  
 7.416  
 7.386

4.770  
 4.545  
 4.531  
 4.516  
 3.917  
 3.637  
 3.201  
 3.189  
 3.177  
 2.876  
 2.862  
 2.849  
 2.678  
 2.598

0.000

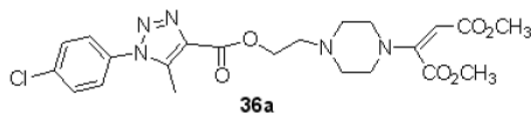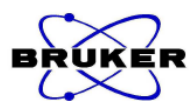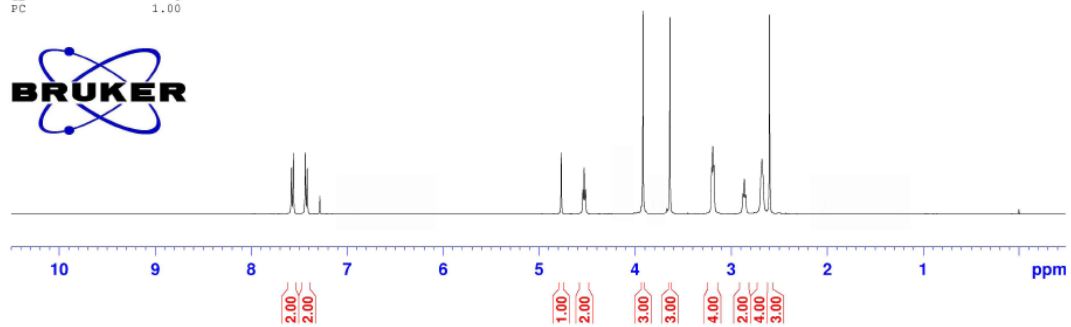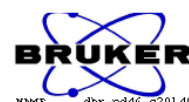

NAME dhr-pd46-c20140505  
 EXPNO 10  
 PROCNO 1  
 Date\_ 20140505  
 Time 11.00  
 INSTRUM spect  
 PROBRD 5 mm PABBO BB/  
 PULPROG zgpg30  
 TD 65536  
 SOLVENT CDCl3  
 NS 200  
 DS 2  
 SWH 24038.461 Hz  
 FIDRES 0.366798 Hz  
 AQ 1.3631088 sec  
 RG 724  
 DW 20.800 usec  
 DE 6.50 usec  
 TE 294.0 K  
 D1 2.00000000 sec  
 D11 0.03000000 sec  
 TD0 1

===== CHANNEL f1 =====  
 SFO1 100.6228298 MHz  
 NUCL 13C  
 P1 12.00 usec  
 SI 32768  
 SF 100.6127627 MHz  
 NDW EM  
 SSB 0  
 LB 1.00 Hz  
 GB 0  
 PC 1.40

166.18  
 165.18  
 161.55  
 154.40

139.31  
 136.72  
 136.49  
 135.98  
 135.74  
 126.72

66.74  
 77.55  
 77.00  
 76.91

61.98  
 58.53  
 55.16  
 52.43  
 51.11  
 47.15

10.16

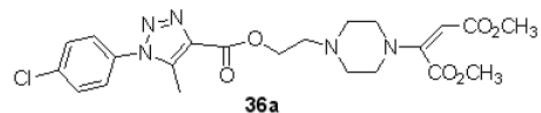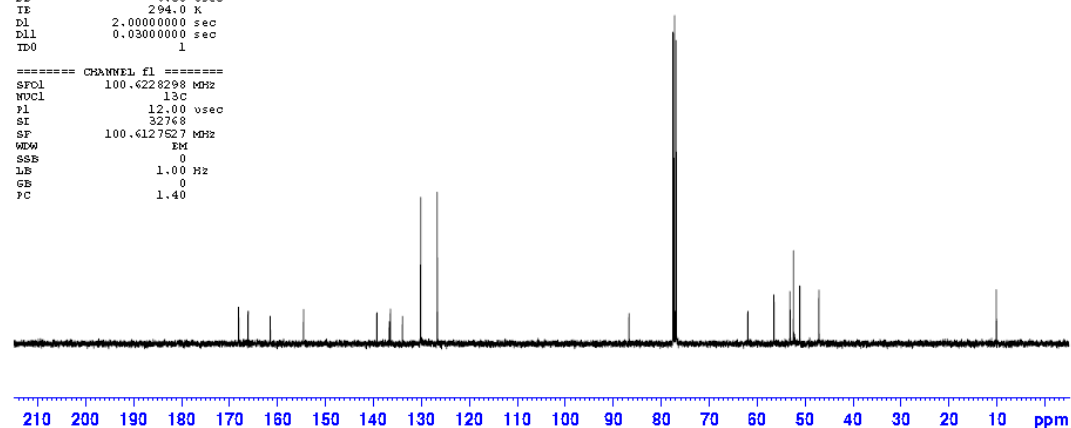

—0.00—

COC(=O)/C=C/C(=O)OC(=O)c1c(C)c(C#N)n(c1-c1ccc(Cl)cc1)c1ccccc1  
**36b**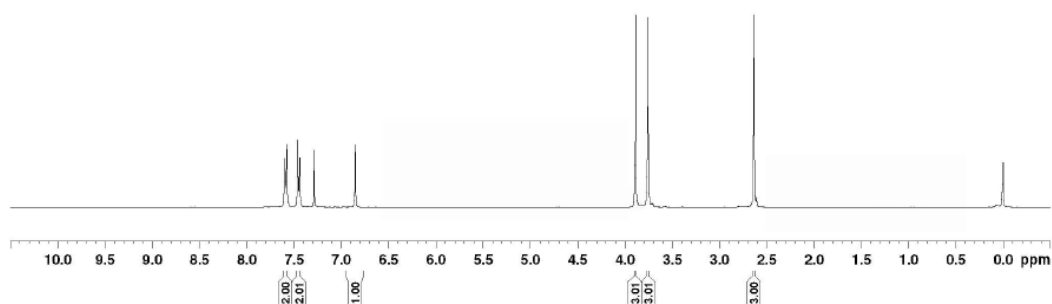

—10.26

COC(=O)/C=C/C(=O)OC(=O)c1c(C)c(C#N)n(c1-c1ccc(Cl)cc1)c1ccccc1

**36b**

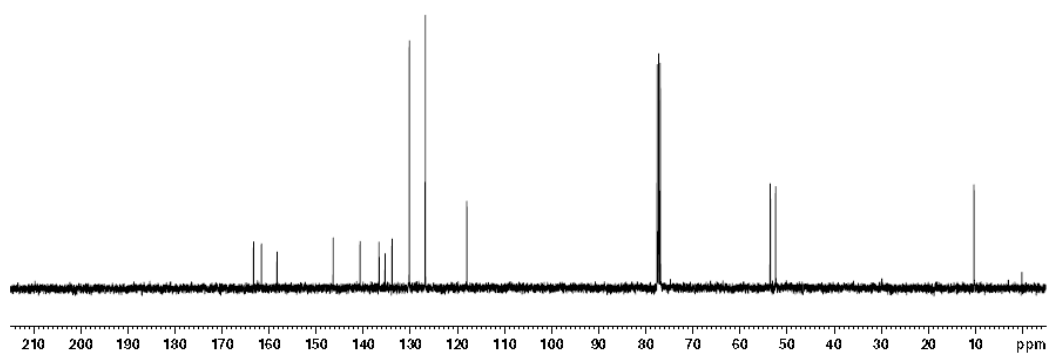

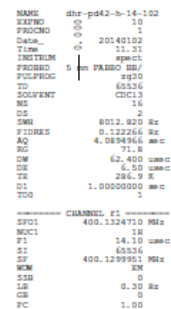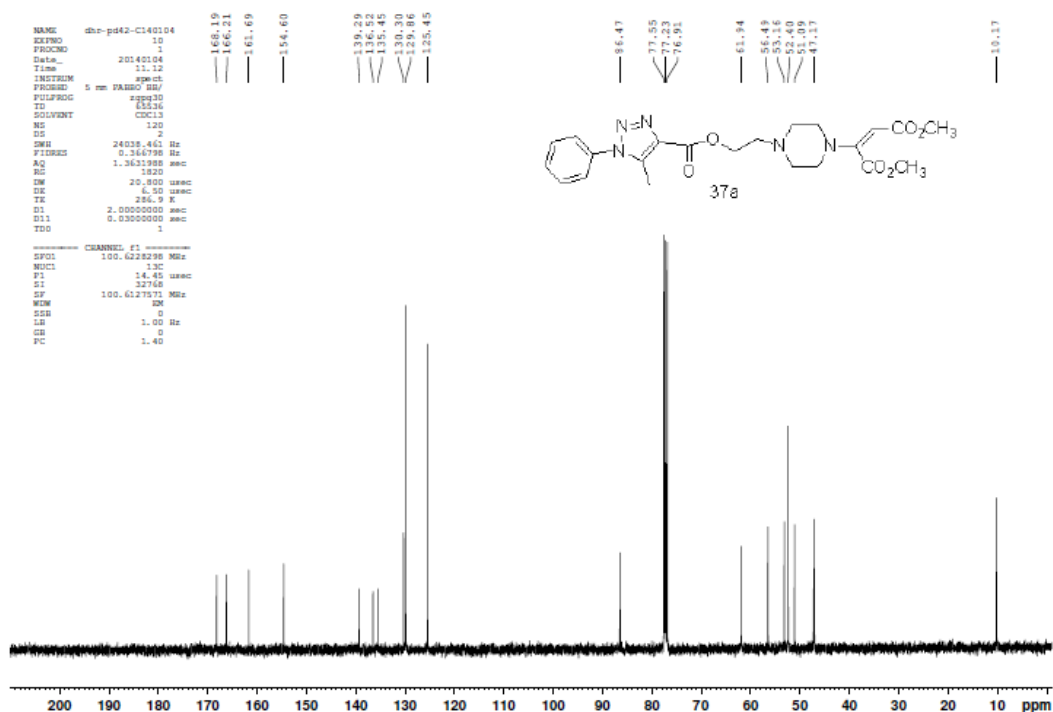

NAME DBR-pd43-H20140522  
EXPNO 10  
PROCNO 1  
Date\_ 20140522  
Time 11.09  
INSTRUM spect  
PROBHD 5 mm PABBO BB/  
PULPROG zg30  
TD 65536  
SOLVENT CDCl3  
NS 10  
DS 2  
SWH 8012.820 Hz  
FIDRES 0.122266 Hz  
AQ 4.0894966 sec  
RG 71.8  
CW 62.400 usec  
DE 6.50 usec  
TE 297.2 K  
D1 1.00000000 sec  
TD0 1

----- CHANNEL f1 -----  
SFO1 400.1324710 MHz  
NUC1 1H  
P1 14.10 usec  
S1 65536  
SF 400.1299923 MHz  
WDW EM  
SSB 0  
LB 0.30 Hz  
GB 0  
PC 1.00

7.354  
7.332  
7.303  
7.054  
7.032

4.766  
4.518  
4.135  
4.118  
4.101  
4.084  
3.913  
3.632  
3.186  
2.849  
2.666  
2.551

1.480  
1.463  
1.446

0.000

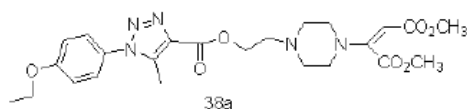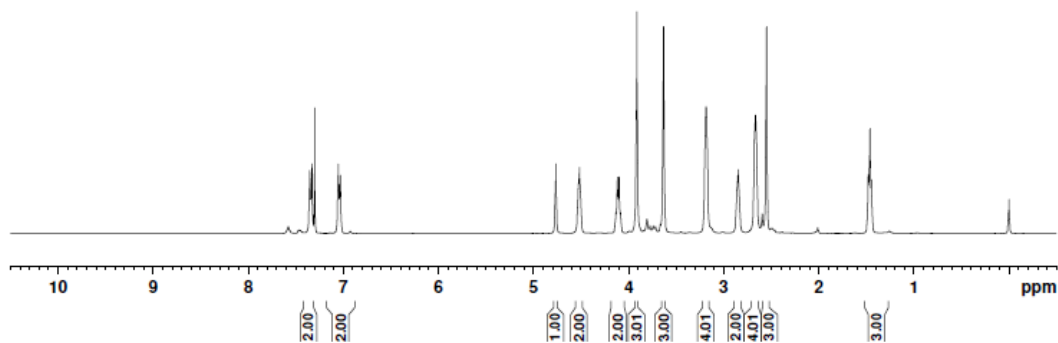

NAME DBR-pd43-C20140522  
EXPNO 10  
PROCNO 1  
Date\_ 20140522  
Time 11.17  
INSTRUM spect  
PROBHD 5 mm PABBO BB/  
PULPROG zgpg30  
TD 65536  
SOLVENT CDCl3  
NS 100  
DS 2  
SWH 24038.461 Hz  
FIDRES 0.366798 Hz  
AQ 1.3631988 sec  
RG 1030  
CW 20.800 usec  
DE 6.50 usec  
TE 298.2 K  
D1 2.00000000 sec  
S11 0.03000000 sec  
TD0 1

----- CHANNEL f1 -----  
SFO1 100.6228298 MHz  
NUC1 13C  
P1 12.00 usec  
S1 32768  
SF 100.6127549 MHz  
WDW EM  
SSB 0  
LB 1.00 Hz  
GB 0  
PC 1.40

169.11  
166.12  
161.72  
160.27  
154.60

139.38  
136.29  
128.11  
126.83

115.38

66.42  
77.55  
77.52  
76.51  
64.12  
61.87  
56.51  
53.37  
52.41  
51.01  
47.17

14.80  
10.05

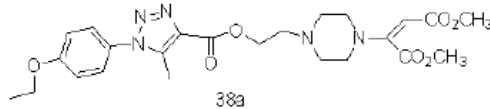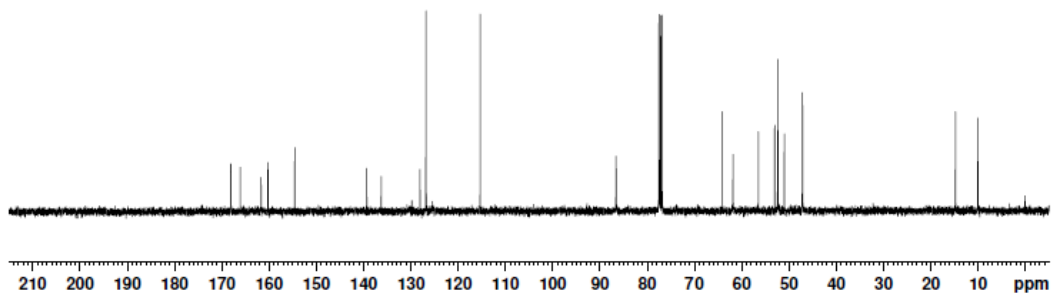

NAME dhr-pd6-H20140516  
EXPNO 10  
PROCNO 1  
Date\_ 20140517  
Time 11:27  
INSTRUM spect  
PROBHD 5 mm PABBO 400  
PULPROG zgpg30  
TD 65536  
SOLVENT CDCl3  
NS 10  
DS 2  
SWH 8012.820 Hz  
FIDRES 0.122244 Hz  
AQ 4.089496 sec  
RG 80.6  
DM 62.400 usec  
DE 6.50 usec  
TE 294.5 K  
D1 1.00000000 sec  
D11 1  
TD0 1

===== CHANNEL f1 =====  
SFO1 400.1324710 MHz  
NUC1 1H  
P1 13.40 usec  
SI 65536  
SF 400.1299990 MHz  
WDW EM  
SSB 0  
LB 0.30 Hz  
GB 0  
PC 1.00

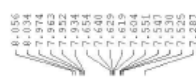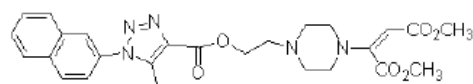

39a

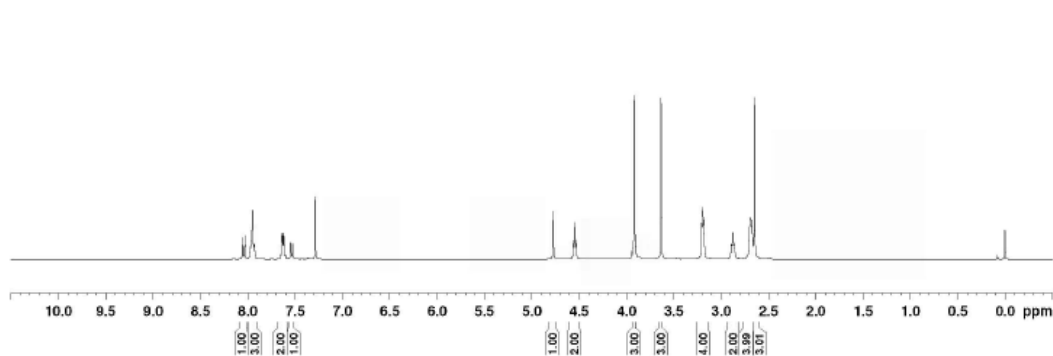

NAME dhr-pd6-c20140516  
EXPNO 10  
PROCNO 1  
Date\_ 20140517  
Time 11:34  
INSTRUM spect  
PROBHD 5 mm PABBO 400  
PULPROG zgpg30  
TD 65536  
SOLVENT CDCl3  
NS 100  
DS 2  
SWH 24038.461 Hz  
FIDRES 0.366798 Hz  
AQ 1.3631988 sec  
RG 2050  
DM 20.400 usec  
DE 6.50 usec  
TE 295.3 K  
D1 2.00000000 sec  
D11 0.03000000 sec  
TD0 1

===== CHANNEL f1 =====  
SFO1 100.6228298 MHz  
NUC1 13C  
P1 14.45 usec  
SI 32768  
SF 100.6127549 MHz  
WDW RM  
SSB 0  
LB 1.00 Hz  
GB 0  
PC 1.40

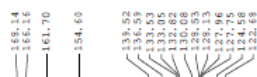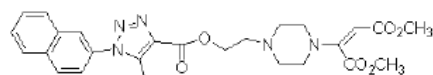

39a

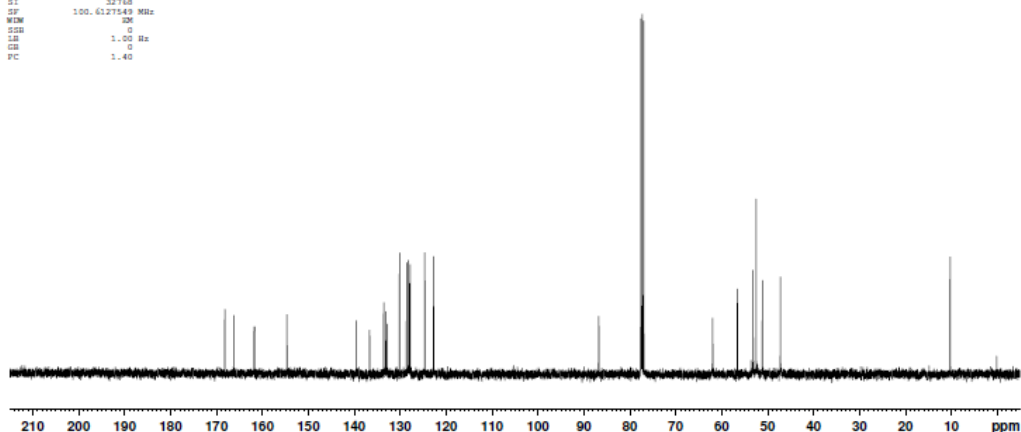

NAME dhr-pd45-H20140515  
EXPNO 10  
PROCNO 1  
Date\_ 20140515  
Time 11.10  
INSTRUM spect  
PROBHD 5 mm PABBO BB/  
PULPROG zgpg30  
TD 65536  
SOLVENT CDCl3  
NS 10  
DS 2  
SWH 8012.820 Hz  
FIDRES 0.122266 Hz  
AQ 4.583996 sec  
RG 32  
DM 62.400 umsec  
DE 6.50 umsec  
TE 291.5 K  
D1 1.0000000 sec  
TDO 1

===== CHANNEL f1 =====  
SFO1 400.1324710 MHz  
NUC1 1H  
P1 14.10 umsec  
PI 65536  
SF 400.1299803 MHz  
WDW EM  
SSB 0  
LB 0.30 Hz  
GB 0  
PC 1.00

7.378  
7.376  
7.333  
7.077  
7.055

4.769  
4.534  
4.520  
4.505

3.916  
3.911  
3.632

3.205  
3.193  
3.180  
3.167

2.852  
2.838  
2.800  
2.656  
2.556

0.000

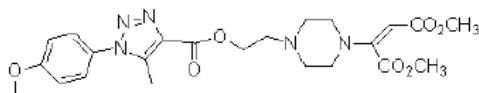

40a

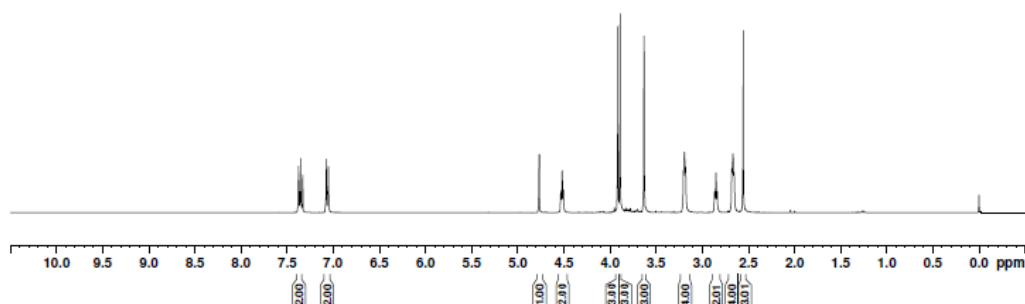

NAME dhr-pd45-H20140515  
EXPNO 10  
PROCNO 1  
Date\_ 20140515  
Time 11.10  
INSTRUM spect  
PROBHD 5 mm PABBO BB/  
PULPROG zgpg30  
TD 65536  
SOLVENT CDCl3  
NS 100  
DS 2  
SWH 24038.461 Hz  
FIDRES 0.366798 Hz  
AQ 1.3631985 sec  
RG 456  
DM 20.600 umsec  
DE 6.50 umsec  
TE 291.5 K  
D1 2.0000000 sec  
D11 0.0300000 sec  
TDO 1

===== CHANNEL f1 =====  
SFO1 100.6228298 MHz  
NUC1 13C  
P1 12.00 umsec  
PI 32768  
SF 100.6127630 MHz  
WDW EM  
SSB 0  
LB 1.00 Hz  
GB 0  
PC 1.40

168.04  
166.05  
161.59  
160.76  
154.50

139.33  
136.10

128.15  
126.77

114.82

86.43  
77.55  
77.23  
76.91

61.72  
56.39  
55.72  
53.61  
52.18  
50.84  
47.54

9.98

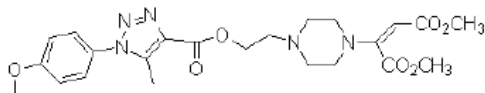

40a

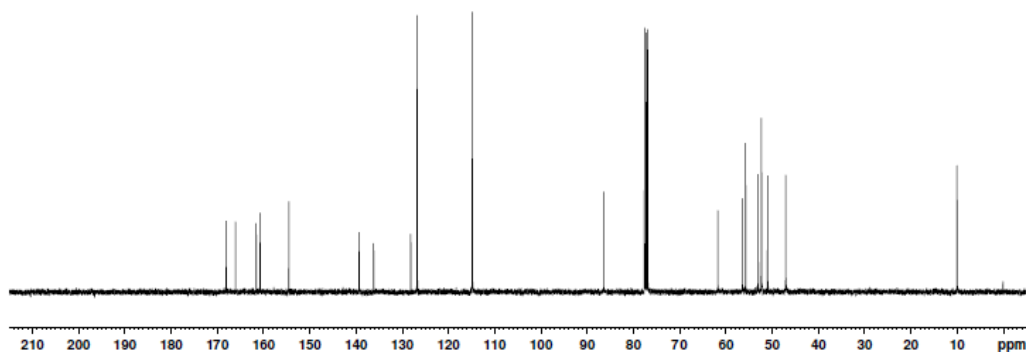

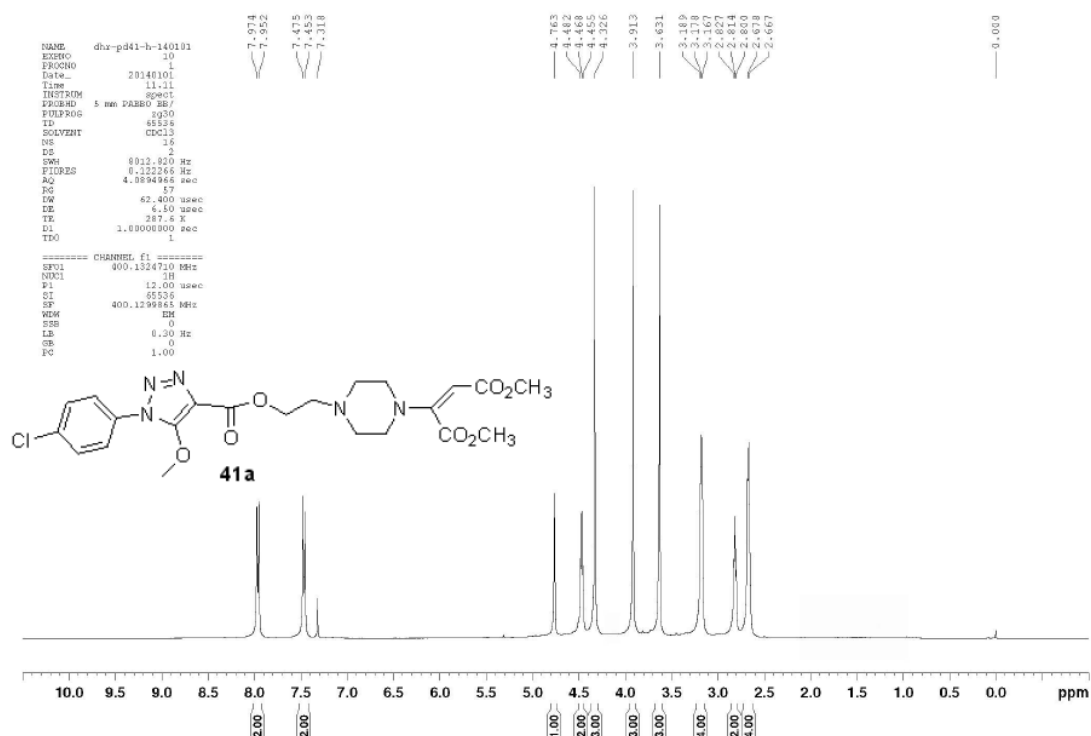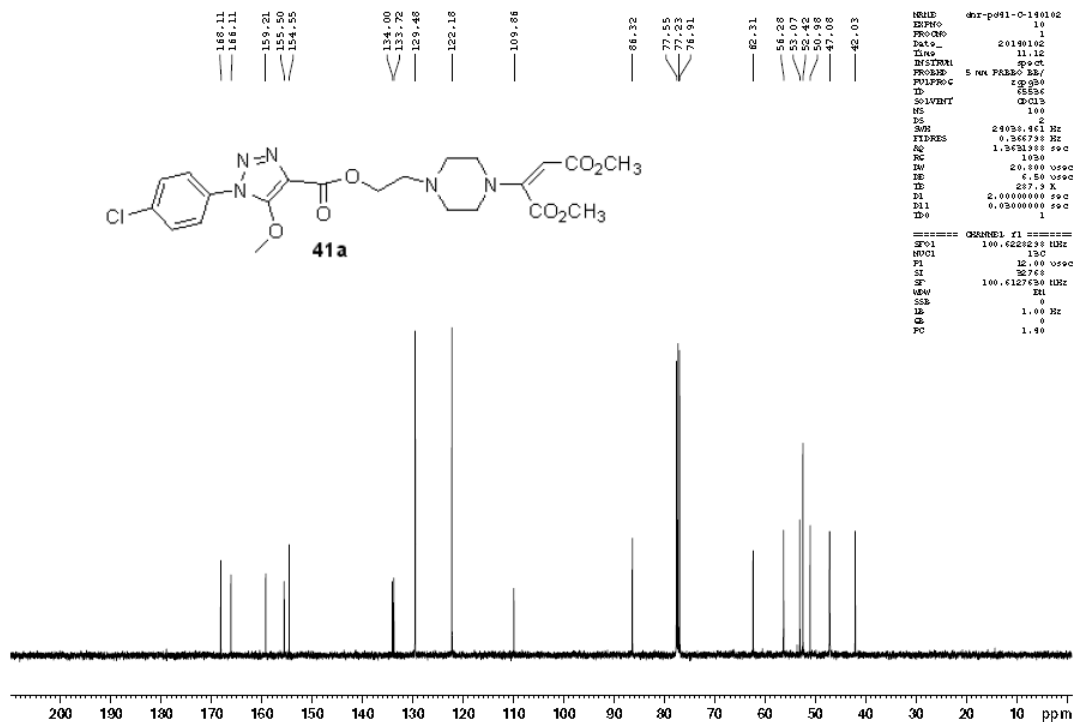



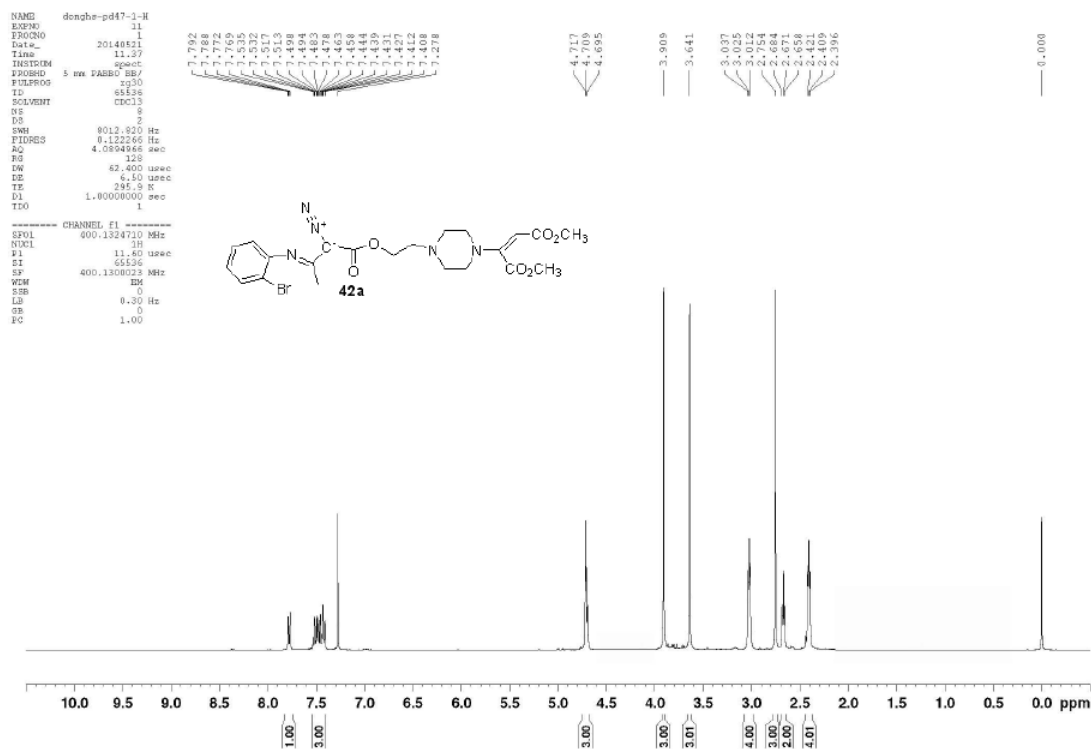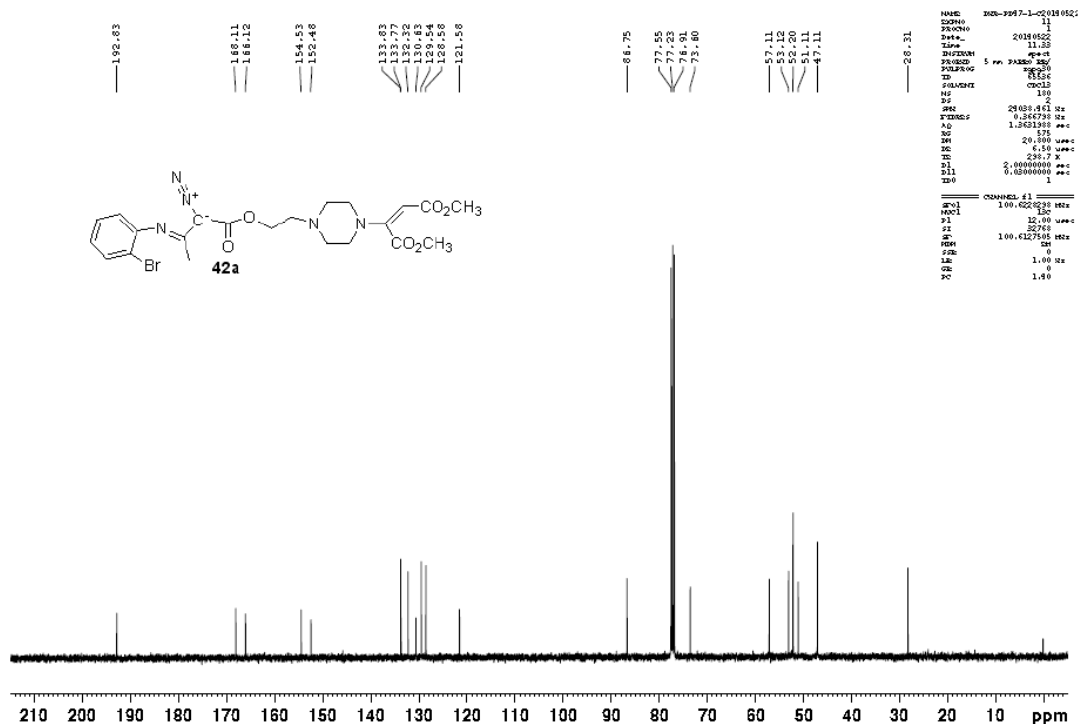

NAME dongha-p447-2-H  
EXPNO 13  
PROCNO 1  
Date\_ 20140521  
Time 11.27  
INSTRUM spect  
PROBHD 5 mm PABBO BB/  
PULPROG zgpg30  
TD 65536  
SOLVENT CDCl3  
NS 2  
DS 2  
SWE 8012.520 Hz  
FIDRES 0.122265 Hz  
AQ 4.0894966 sec  
RG 327  
CW 62.400 usec  
DE 6.50 usec  
TE 296.0 K  
D1 1.00000000 sec  
D11 0  
D12 0  
===== CHANNEL f1 =====  
SFO1 400.1324710 MHz  
NUC1 1H  
P1 11.60 usec  
PT 45538  
SF 400.1324710 MHz  
WDW EM  
SSB 0  
LB 0.30 Hz  
GB 0  
PC 1.00

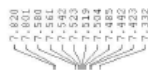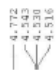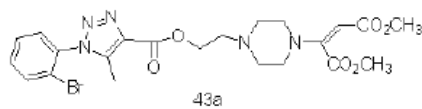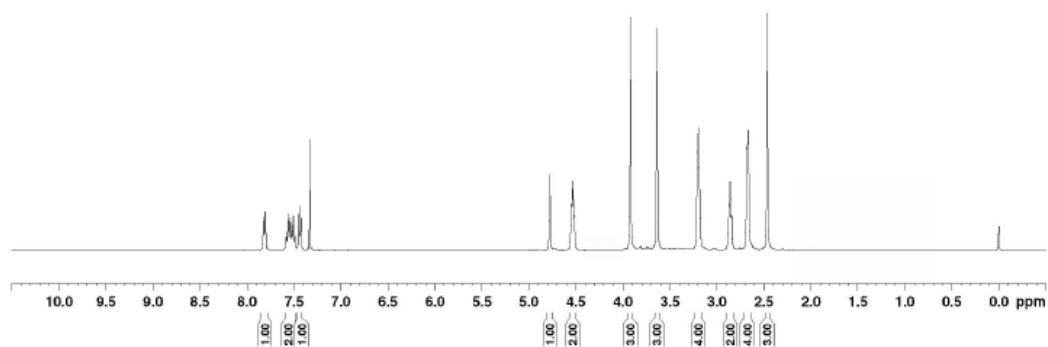

NAME dongha-p447-2-C  
EXPNO 13  
PROCNO 1  
Date\_ 20140521  
Time 11.32  
INSTRUM spect  
PROBHD 5 mm PABBO BB/  
PULPROG zgpg30  
TD 65536  
SOLVENT CDCl3  
NS 2  
DS 2  
SWE 24038.451 Hz  
FIDRES 0.346798 Hz  
AQ 1.3431988 sec  
RG 2050  
CW 20.000 usec  
DE 6.50 usec  
TE 296.0 K  
D1 2.00000000 sec  
D11 0.03000000 sec  
D12 1  
===== CHANNEL f1 =====  
SFO1 100.6228298 MHz  
NUC1 13C  
P1 14.45 usec  
PT 32768  
SF 100.6228298 MHz  
WDW EM  
SSB 0  
LB 1.00 Hz  
GB 0  
PC 1.40

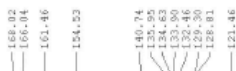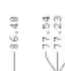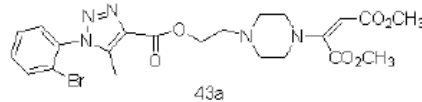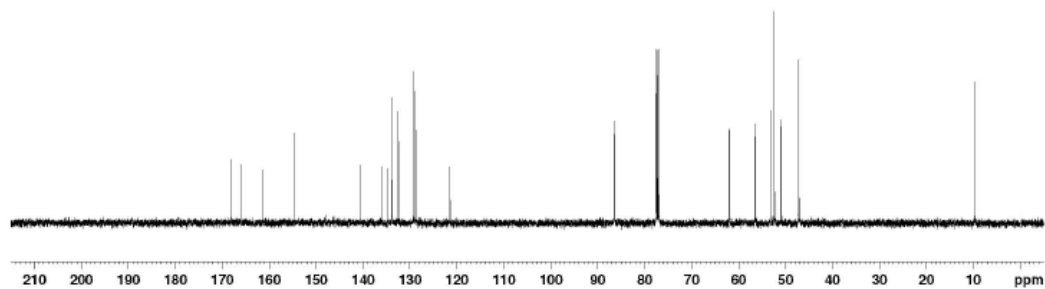

—0.000

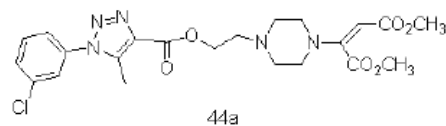

44a

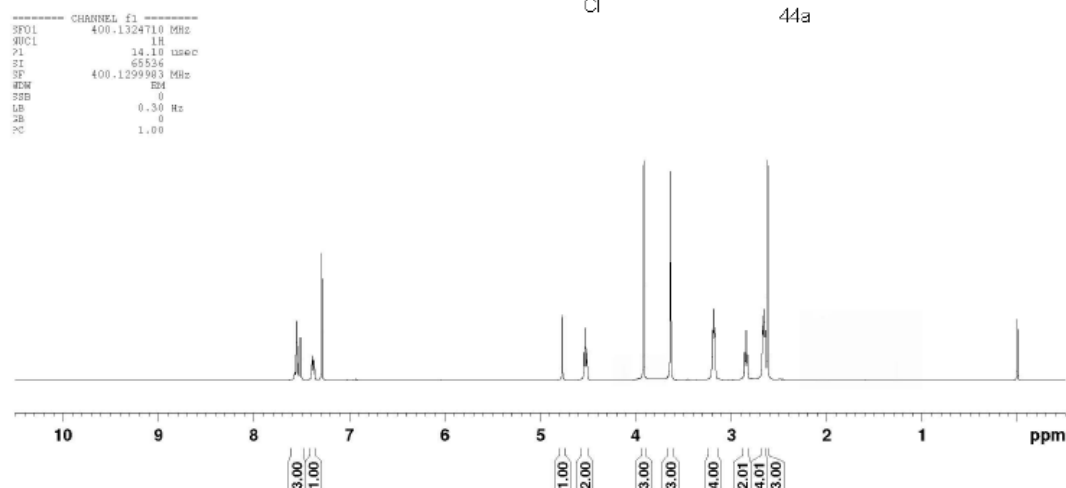

—10.06

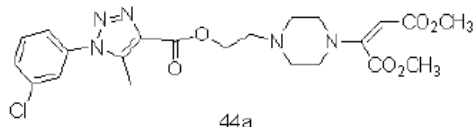

44a

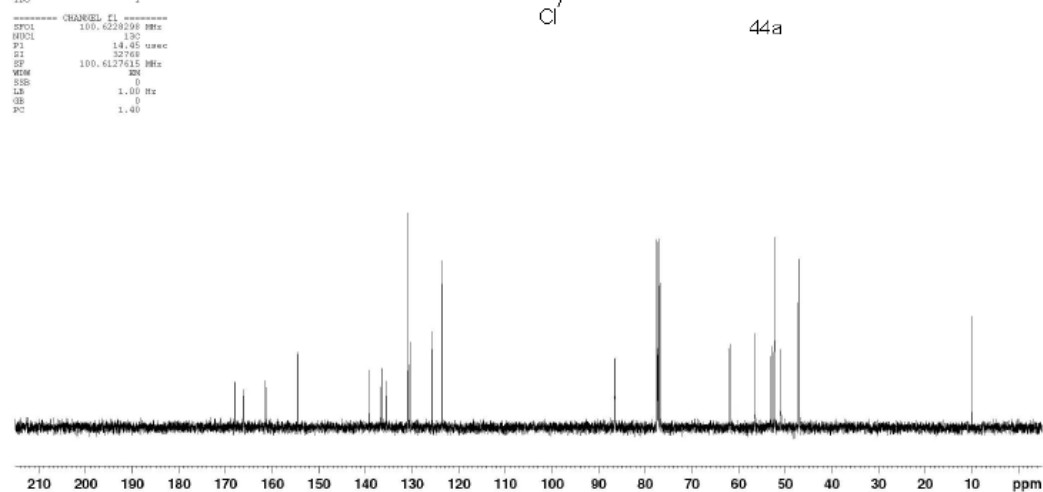

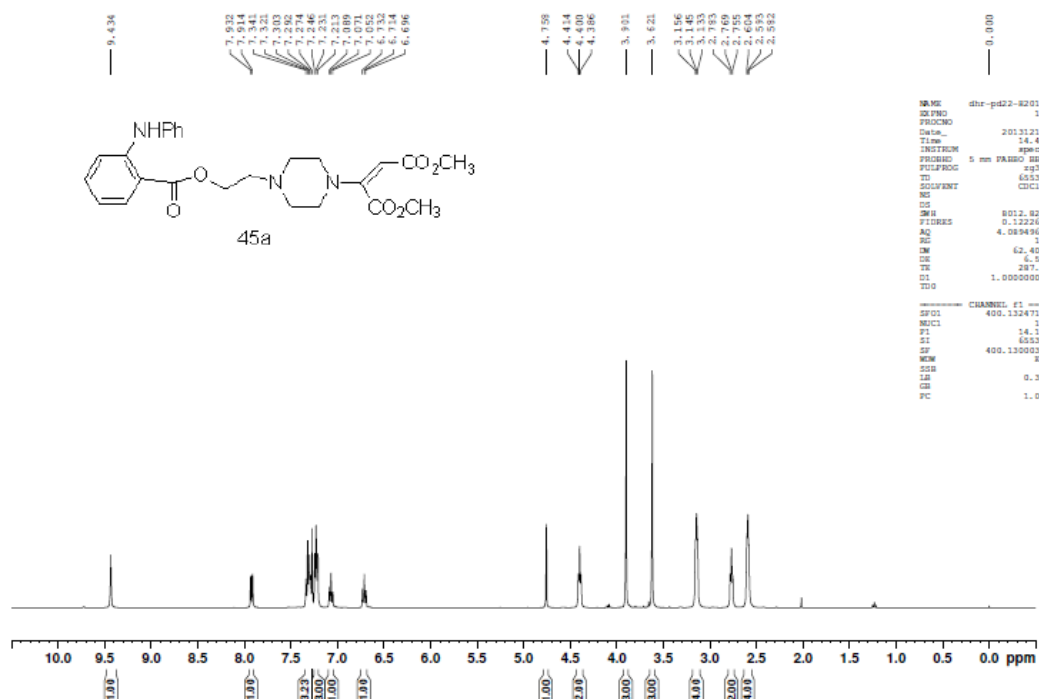

NAME: dhr-pd22-820131  
EXPNO: 10  
PROCNO: 1  
Date\_: 20131216  
Time: 14.42  
INSTRUM: spect  
PROBHD: 5 mm PABBO BB/  
PULPROG: zgpg30  
TD: 65536  
SOLVENT: CDCl<sub>3</sub>  
NS: 5  
DS: 2  
SWH: 8012.820 Hz  
FIDRES: 0.122266  
AQ: 4.0894966  
RG: 18  
DM: 62.400  
DE: 6.50  
TE: 287.1 K  
D1: 1.00000000  
TD0: 1

===== CHANNEL f1 =====  
SFO1: 400.1324710 MHz  
NUC1: <sup>1</sup>H  
P1: 14.10  
S1: 65536  
SF: 400.1300036 MHz  
WDW: EM  
SSB: 0  
LB: 0.30  
GB: 0  
PC: 1.00

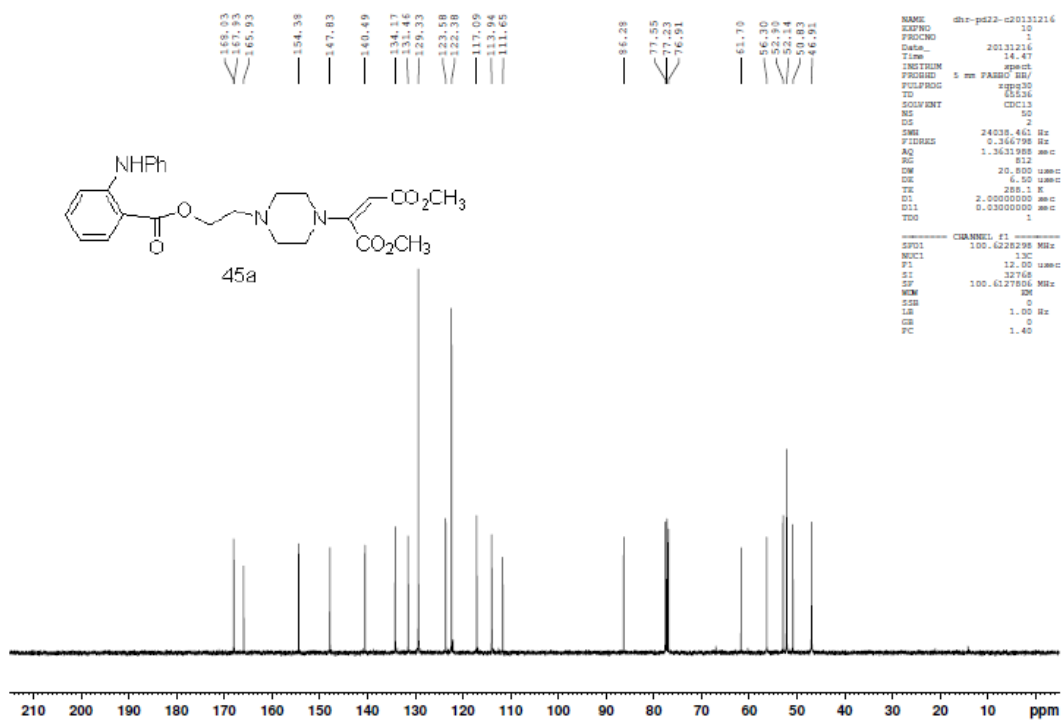

NAME: dhr-pd22-820131216  
EXPNO: 10  
PROCNO: 1  
Date\_: 20131216  
Time: 14.47  
INSTRUM: spect  
PROBHD: 5 mm PABBO BB/  
PULPROG: zgpg30  
TD: 65536  
SOLVENT: CDCl<sub>3</sub>  
NS: 50  
DS: 2  
SWH: 24038.461 MHz  
FIDRES: 0.366796 MHz  
AQ: 1.3631988 sec  
RG: 812  
DM: 20.800 usec  
DE: 6.50 usec  
TE: 288.1 K  
D1: 2.00000000 sec  
D11: 0.03000000 sec  
TD0: 1

===== CHANNEL f1 =====  
SFO1: 100.6226298 MHz  
NUC1: <sup>13</sup>C  
P1: 12.00 usec  
S1: 32768  
SF: 100.6127806 MHz  
WDW: EM  
SSB: 0  
LB: 1.00 MHz  
GB: 0  
PC: 1.40

NAME dha-pd33-H20131218  
EXPNO 10  
PROCNO 1  
Date\_ 20131218  
Time 2.15  
INSTRUM spect  
PROBHD 5 mm F4000 BBO  
PULPROG zgpg30  
TD 65536  
F2 400.1296199 MHz  
SOLVENT CDCl3  
NS 1  
DS 2  
SWH 8012.820 Hz  
FIDRES 0.122264 Hz  
AQ 4.0894984 sec  
RG 32  
CW 62.400 usec  
DE 9.50 usec  
TE 286.3 K  
D1 1.00000000 sec  
D11 1  
D12 1

===== CHANNEL f1 =====  
SFOL 400.1324710 MHz  
NUC1 1H  
P1 14.10 usec  
PL 0.00 dB  
SFO1 400.1296199 MHz  
NUC2 1H  
P2 0.00 dB  
SFO2 400.1296199 MHz  
PC 1.00

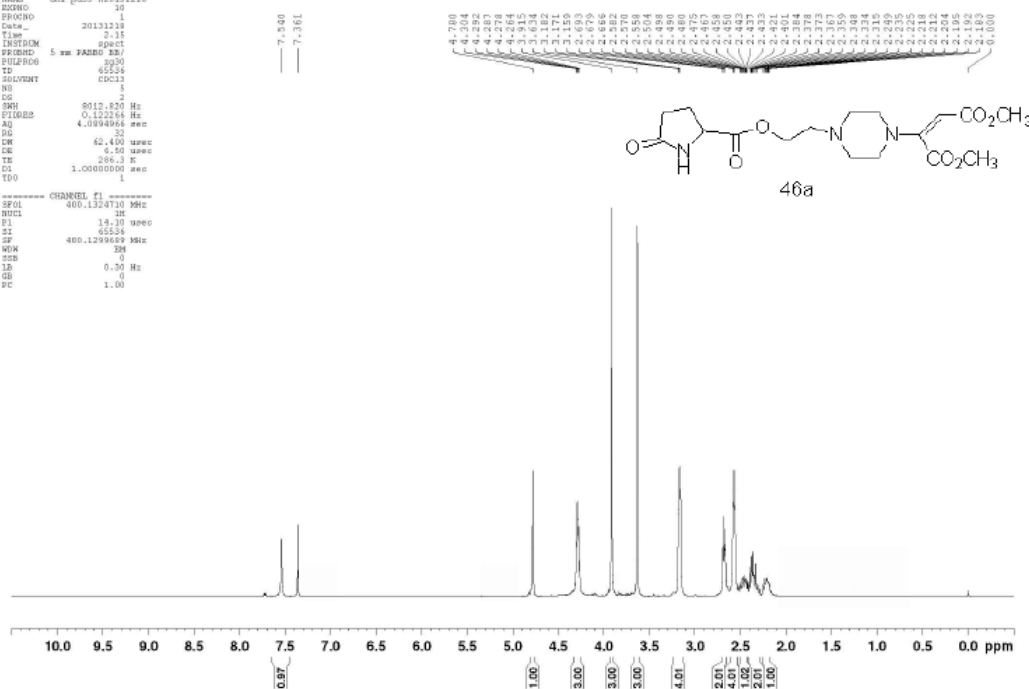

NAME dha-pd33-c20131218  
EXPNO 10  
PROCNO 1  
Date\_ 20131218  
Time 2.15  
INSTRUM spect  
PROBHD 5 mm F4000 BBO  
PULPROG zgpg30  
TD 65536  
F2 400.1296199 MHz  
SOLVENT CDCl3  
NS 1  
DS 2  
SWH 24038.461 Hz  
FIDRES 0.366798 Hz  
AQ 1.3631988 sec  
RG 1020  
CW 20.000 usec  
DE 9.50 usec  
TE 287.3 K  
D1 2.00000000 sec  
D11 0.43000000 sec  
D12 1  
D13 1

===== CHANNEL f1 =====  
SFOL 100.6226298 MHz  
NUC1 13C  
P1 12.00 usec  
PL 0.00 dB  
SFO1 100.6127704 MHz  
NUC2 13C  
P2 0.00 dB  
SFO2 100.6127704 MHz  
PC 1.40

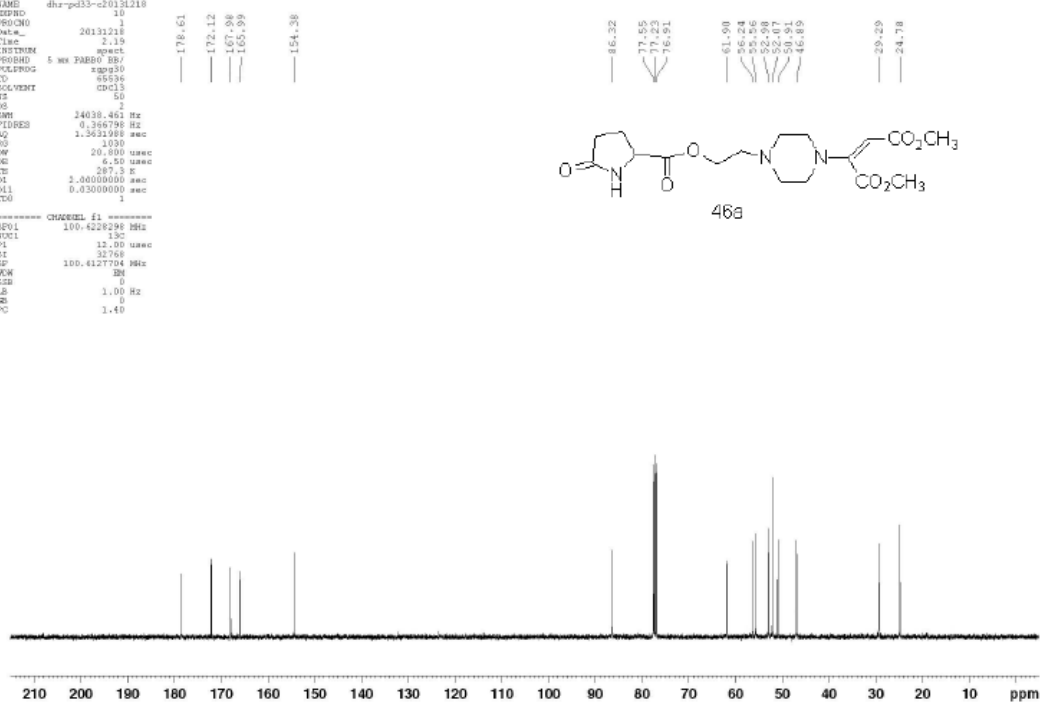

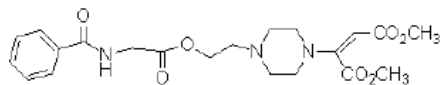

47a

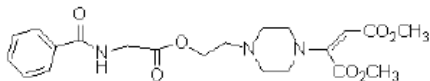

47a

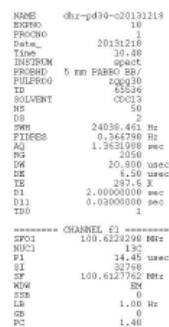

NAME dhr-pd12-H20131213  
EXPNO 10  
PROCNO 1  
Date\_ 20131214  
Time 11:21  
INSTRUM spect  
PROBHD 5 mm PABBO BB/  
PULPROG zgpg30  
TD 65536  
SOLVENT CDCl3  
NS 2  
DS 2  
SWH 9012.020 Hz  
FIDRES 0.122266 Hz  
AQ 4.894955 sec  
RG 32  
ZM 62.400 usec  
DE 6.50 usec  
TE 297.6 K  
D1 1.0000000 sec  
D11 1  
D10 1

----- CHANNEL f1 -----  
SFO1 400.1524710 MHz  
NUC1 1H  
P1 12.00 usec  
SI 65536  
SF 400.1500889 MHz  
SSB 0  
LB 0.30 Hz  
GB 0  
PC 1.00

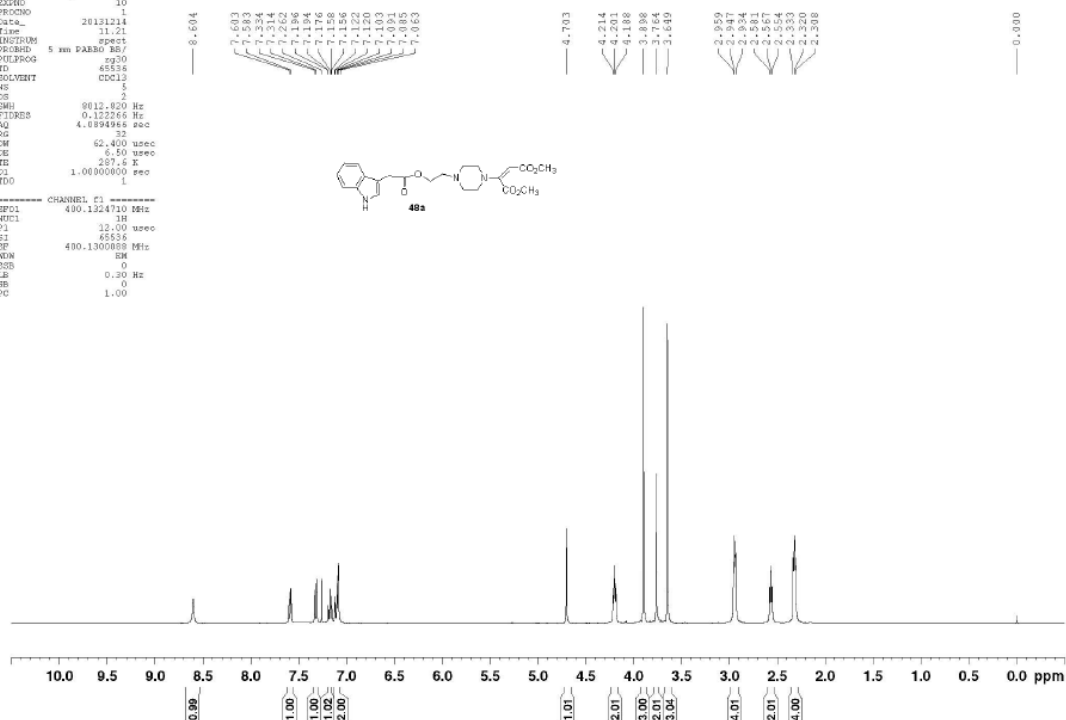

NAME dhr-pd12-c20131213  
EXPNO 10  
PROCNO 1  
Date\_ 20131214  
Time 11:20  
INSTRUM spect  
PROBHD 5 mm PABBO BB/  
PULPROG zgpg30  
TD 65536  
SOLVENT CDCl3  
NS 2  
DS 2  
SWH 24038.461 Hz  
FIDRES 0.366798 Hz  
AQ 1.3631968 sec  
RG 2050  
ZM 28.900 usec  
DE 6.50 usec  
TE 298.6 K  
D1 2.0000000 sec  
D11 0.0300000 sec  
D10 1

----- CHANNEL f1 -----  
SFO1 100.6229298 MHz  
NUC1 13C  
P1 14.45 usec  
SI 32768  
SF 100.6127644 MHz  
SSB 0  
LB 1.00 Hz  
GB 0  
PC 1.40

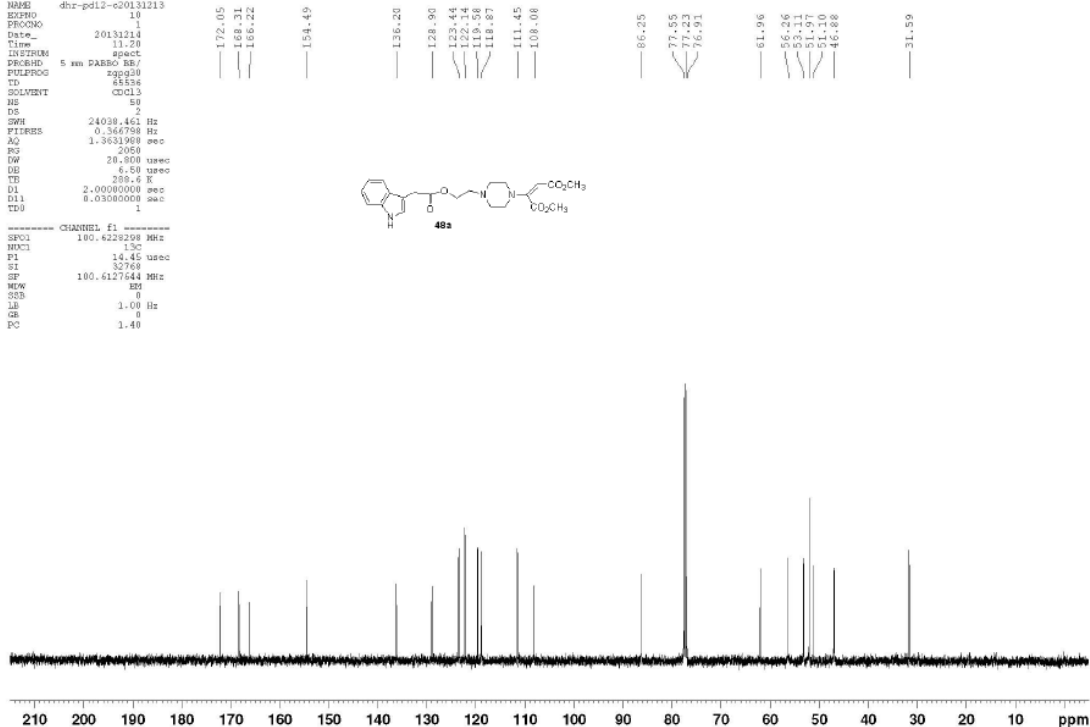

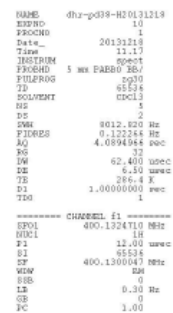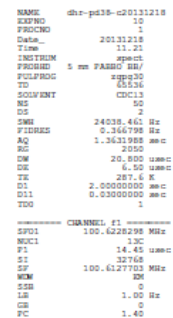



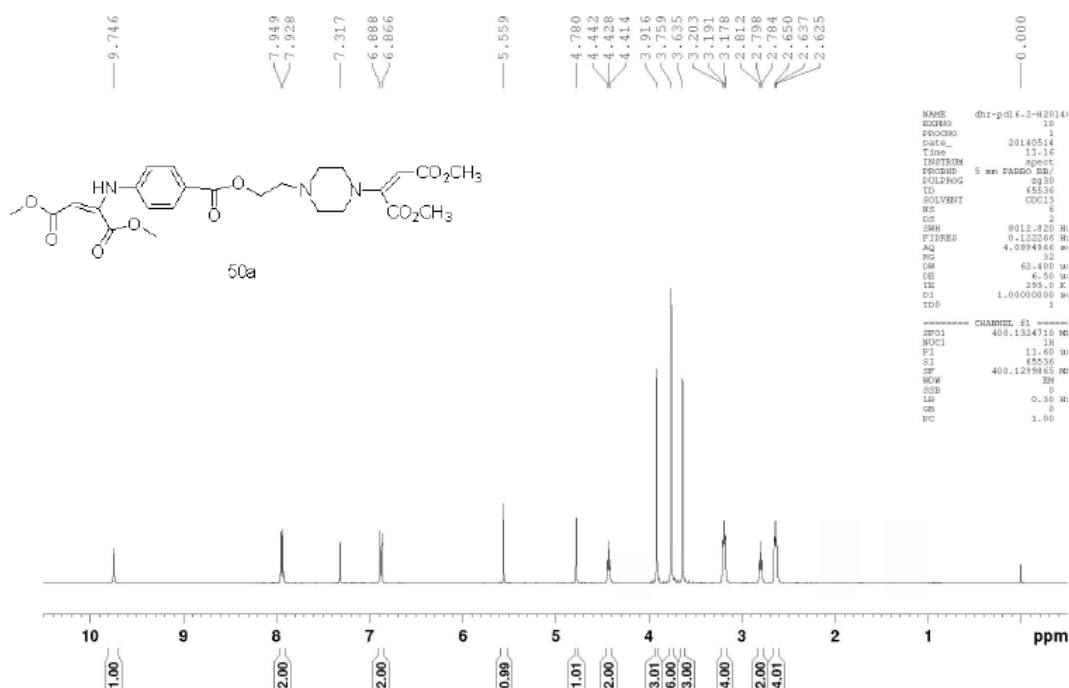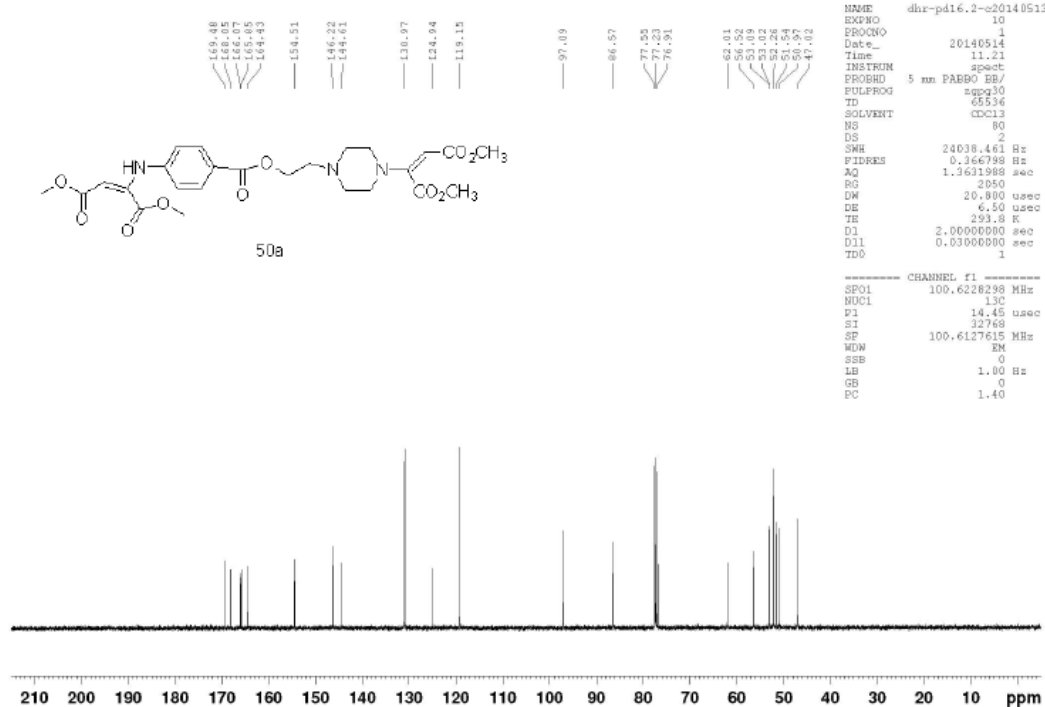

NAME dhx-pd49-H20140515  
EXPNO 10  
PROCNO 1  
Date\_ 20140515  
Time 11:24  
INSTRUM spect  
PROBHD 5 mm PABBO BB/  
PULPROG zgpg30  
TD 65536  
SOLVENT CDCl3  
NS 10  
DS 2  
SWH 6012.920 Hz  
FIDRES 0.123266 Hz  
AQ 4.0894966 sec  
RG 32  
RW 62.400 usec  
DE 6.50 usec  
TE 291.6 K  
D1 1.00000000 sec  
D10 1

===== CHANNEL f1 =====  
SFO1 400.1324710 MHz  
NUC1 1H  
P1 14.10 usec  
ST 65536  
SF 400.1299967 MHz  
WDW EM  
SSB 0  
LB 0.30 Hz  
GB 0  
PC 1.00

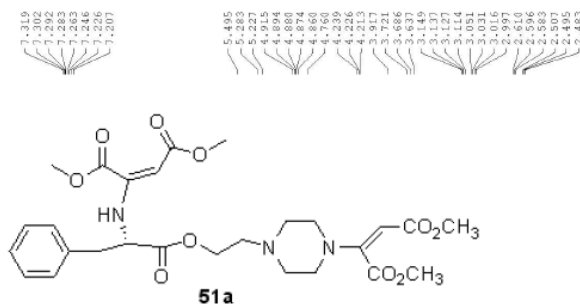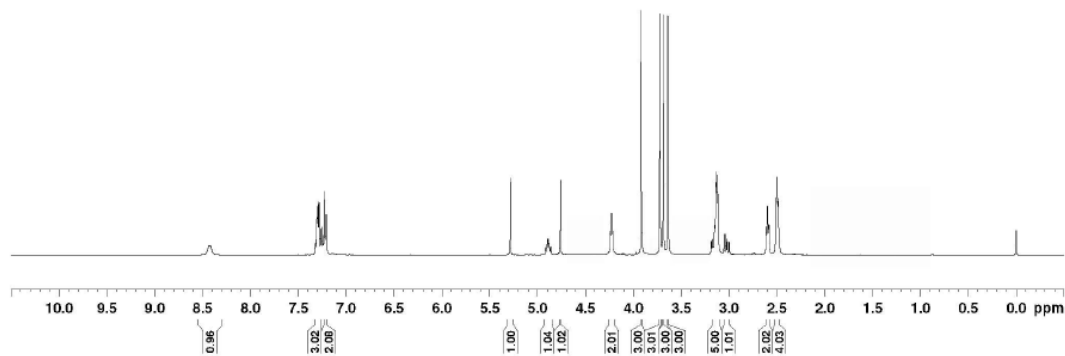

NAME dhx-pd49-H20140515  
EXPNO 10  
PROCNO 1  
Date\_ 20140515  
Time 11:24  
INSTRUM spect  
PROBHD 5 mm PABBO BB/  
PULPROG zgpg30  
TD 65536  
SOLVENT CDCl3  
NS 100  
DS 2  
SWH 24038.461 Hz  
FIDRES 0.164798 Hz  
AQ 1.1613988 sec  
RG 362  
RW 20.000 usec  
DE 6.50 usec  
TE 293.0 K  
D1 2.00000000 sec  
D11 0.03000000 sec  
D10 1

===== CHANNEL f1 =====  
SFO1 100.6228298 MHz  
NUC1 13C  
P1 12.00 usec  
ST 32768  
SF 100.6227593 MHz  
WDW EM  
SSB 0  
LB 1.00 Hz  
GB 0  
PC 1.40

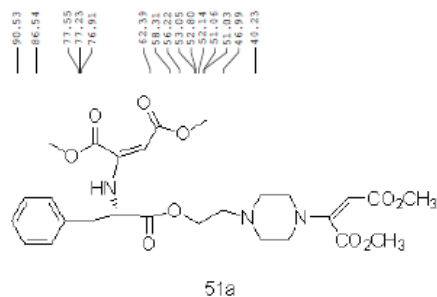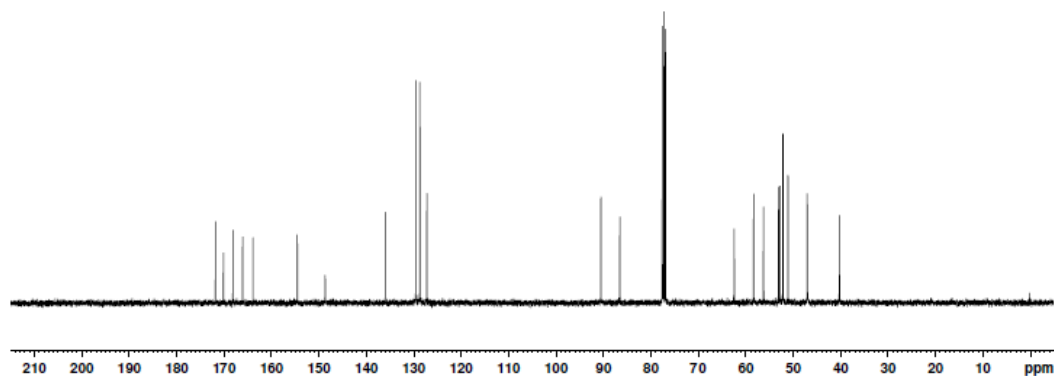

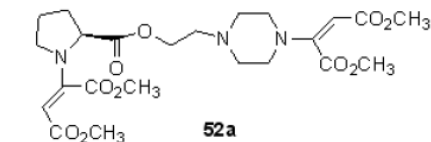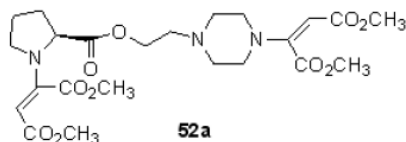

Supplement: c4ra14811h2.pdf [file c4ra14811h2.pdf]
