# Supplementary material for: Convenient and efficient synthesis of disubstituted piperazine derivatives by catalyst-free, atom-economical and tricomponent domino reactions
Source: Royal Society of Chemistry journal article supplement (doi:10.1039/c4ra14811h), 2015-01-01
Supplement: c4ra14811h1.pdf [file c4ra14811h1.pdf]

Supplementary information and chemical compound information 1

Convenient and efficient synthesis of disubstituted piperazine derivatives by catalyst-free, atom-economical and tricomponent domino reactions

Hong-Ru Dong, Zi-Bao Chen, Rong-Shan Li, Heng-Shan Dong\* and Zhi-Xiang Xie \*

College of Chemistry and Chemical Engineering, State Key Laboratory of Applied Organic Chemistry, Institute of Organic Chemistry, Lanzhou University, Lanzhou, Gansu 730000, P, R China

[donghengshan@lzu.edu.cn](mailto:donghengshan@lzu.edu.cn); [xiezx@lzu.edu.cn](mailto:xiezx@lzu.edu.cn)

## Experimental Section

### General information:

All reactions involving air- and moisture-sensitive reagent were carried out under an argon atmosphere. All chemicals were purchased from Aldrich and used without further purification. Thin-layer chromatography (TLC) was performed using 60 mesh silica gel plates visualized with short-wavelength UV light (254nm). Silica gel 60 (230~400 mesh) was used for column chromatography. IR spectra were recorded with an FT-IR spectrometer as KBr plates or as thin films and peaks are reported in  $\text{cm}^{-1}$ .  $^1\text{H}$  NMR and  $^{13}\text{C}$  NMR spectra were recorded on a Bruker INOVA-400 and a Bruker AVANCE III 400 NMR spectra instrument was recorded on (400 MHz for  $^1\text{H}$  and 100 MHz for  $^{13}\text{C}$ ). Chemical shifts ( $\delta$ ) were measured in ppm relative to TMS  $\delta = 0$  ppm for  $^1\text{H}$  or to chloroform  $\delta = 77.0$  ppm for  $^{13}\text{C}$  as internal standard. Data are reported as follows: Chemical shift, multiplicity (s = singlet, d = doublet, t = triplet, q = quartet, m = multiplet), Coupling constants,  $J$ , are reported in Hz. Mass spectrum were recorded on a Esquire 6000 spectrometer (EI at 70eV), melting points (m.p.) were measured on an XT4-100x microscopic melting point apparatus and are uncorrected, high resolution mass spectrometry were measured with MICRO-TOF QII (ESI).

### Typical procedure for the reactions

The mixture of THF (6.16 mol, 500 ml) and  $\text{LiAlH}_4$  (0.08 mol, 3 g) was stirred and refluxed for two hours and steamed out as solvent of the reaction.

Place mixture of  $\text{DABCO}\cdot 6\text{H}_2\text{O}$  (0.46 mol, 100 g) and benzene (120 ml) in a 250 ml flask fitted oil-water separator and a water-cooled reflux condenser was stirred and refluxed until water has not be steamed out, maintain the temperature at this level with continuous stirring for 1 hour. After solvent benzene was steamed, the residual material was cooled to room temperature. The residual material was re-crystallised by anhydrous  $\text{Et}_2\text{O}$  to obtain the reagent.

Dimethyl acetylene dicarboxylate (DMAD) was re-steamed under a small amount (20~30mg) of zinc powder and reduced pressure. The method was yet suitable for re-distillation of furfural, etc.

To a clear solution of the armoitic acid (1 mmol, 1.00 equiv.) in anhydrous THF (2~8 ml) was added the DABCO (1 mmol, 1.00 equiv.) under stirring at room temperature. After the reaction mixture was stirred for 0.5 hours, the solution was changed from clear to paste. Then, DMAD (1.1mmol, 1.10 equiv.) was dropwise added to paste the mixture and the color of the paste mixture was gradually changed to dark and into solution. The reaction mixture was stirred for 8 hours at room temperature. The solvent was removed under reduced pressure. The given residue was purified by column chromatography using a mixture of petroleum ether and ethyl acetate as eluent to afford product.

**1-[2-(4-Bromobenzoyloxy)eth-1-yl]-4-[(E)-1,2-(dimethoxycarbonyl)ethen-1-yl]piperazine 1a**

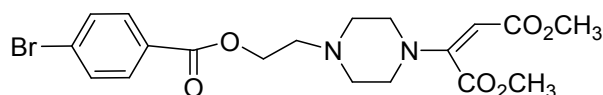

Yield: 86%; light brown sticky clumps,  $^1\text{H}$  NMR (400MHz,  $\text{CDCl}_3$ ):  $\delta$  = 7.890-7.868(d,  $J$  = 8.8Hz, 2H), 7.595-7.573(d,  $J$  = 8.8Hz, 2H), 4.775(s, 1H), 4.457-4.428(t,  $J$  = 5.6Hz, 2H), 3.918(s, 3H), 3.635(s, 3H), 3.190-3.166(t,  $J$  = 4.8Hz, 4H), 2.806-2.778(t,  $J$  = 5.6Hz, 2H), 2.631-2.607(t,  $J$  = 4.8Hz, 4H);  $^{13}\text{C}$  NMR (100MHz,  $\text{CDCl}_3$ ):  $\delta$  = 168.0, 166.0, 165.6, 154.4, 131.7, 131.1, 128.9, 128.1, 86.4, 62.3, 56.4, 53.0, 52.2, 50.9, 47.1; IR (KBr,  $\text{cm}^{-1}$ ): 3057(w, =C-H), 2947, 2850(w, C-H), 1741, 1721, 1695(s, C=O), 1587(s), 1443 (m, Ar), 1370(w,  $\text{CH}_3$ ), 1273 (m, C-O), 1158, 1113 (m, C-N), 855, 752 (s, Ar); MS  $m/z$ (%): 454(2.5) ( $\text{M}^+$ ), 456(2.2)( $\text{M}+2$ ), 425(4.20), 368(10.90), 282(5.74), 254(6.24), 242(12.03), 241(100), 227(17.7), 209(13.3), 185(20.03), 142(20.03), 140(7.8), 82(7), 56(6), 44(9). **HRMS** (ESI) calcd for  $\text{C}_{19}\text{H}_{24}\text{BrN}_2\text{O}_6$  [ $\text{M}+\text{H}$ ] $^+$  455.0818, found 455.0821.

**(E)-1-(4-Bromobenzoyloxy)-1,2-di(methoxycarbonyl)ethene 1b**

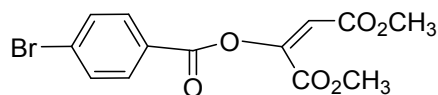

Yield: 11%; white flake, mp: 76-77°C,  $^1\text{H}$  NMR (400MHz,  $\text{CDCl}_3$ ):  $\delta$  = 8.020-7.998(d,  $J$  = 8.8Hz, 2H), 7.661-7.640(d,  $J$  = 8.4Hz, 2H), 6.795(s, 1H), 3.864(s, 1H), 3.720(s, 1H);  $^{13}\text{C}$  NMR (100MHz,  $\text{CDCl}_3$ ):  $\delta$  = 163.3, 163.2, 161.7, 146.9, 132.2, 132.1, 129.6, 127.2, 117.5, 53.5, 52.4; IR (KBr,  $\text{cm}^{-1}$ ): 3093 (w, =C-H), 2955(w, C-H), 1738, 1663(s, C=O), 1590 (m, Ar), 1436(w,  $\text{CH}_3$ ), 1278 (m, C-O), 1102, 1068(m, C-N), 845, 767 (s, Ar); MS  $m/z$ (%): 342(2)( $\text{M}^+$ ), 186(6), 183(100), 157(21), 155(25), 76(11), 44(27). **HRMS** (ESI) calcd for  $\text{C}_{13}\text{H}_{12}\text{BrO}_6$  [ $\text{M}+\text{H}$ ] $^+$  342.9817, found 342.9818.

**1-[2-(2-Chlorobenzoyloxy)ethyl-1-yl]-4-[(E)-1,2-(dimethoxycarbonyl)ethen-1-yl]piperazine 2a**

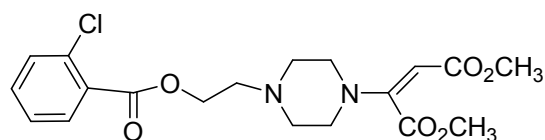

Yield: 86%; light yellow sticky clumps,  $^1\text{H}$  NMR (400MHz,  $\text{CDCl}_3$ ):  $\delta$  = 7.806-7.784(m, 1H), 7.464-7.406(m, 2H), 7.346-7.505(m, 1H), 4.774(s, 1H), 4.478-4.450(t,  $J$  = 5.6Hz, 2H), 3.913(s, 3H), 3.630(s, 3H), 3.189-3.164(t,  $J$  = 4.8Hz, 4H), 2.801-2.772(t,  $J$  = 5.6Hz, 2H), 2.628-2.603(t,  $J$  = 4.8Hz, 4H);  $^{13}\text{C}$  NMR (100MHz,  $\text{CDCl}_3$ ):  $\delta$  = 168.0, 166.0, 165.5, 154.5, 133.4, 132.6, 131.2, 131.0, 130.1, 126.6, 86.3, 62.3, 56.3, 52.9, 52.1, 50.9, 47.0; IR (KBr,  $\text{cm}^{-1}$ ): 3061(w, =C-H), 2951, 2844(w, C-H), 1741, 1697 (s, C=O), 1588(s), 1438 (m, Ar), 1370(w,  $\text{CH}_3$ ), 1250 (m, C-O), 1158, 1120 (m, C-N), 869, 751 (s, Ar); MS  $m/z$ (%): 410(5) ( $\text{M}^+$ ), 412(1)( $\text{M}+2$ ), 379(7), 351(4), 326(8), 324(26), 254(6), 242(12), 241(100), 238(21), 226(18), 209(15), 185(15), 183(24), 141(13), 139(37), 111(6), 82(7), 56(6), 44(9). **HRMS** (ESI) calcd for  $\text{C}_{19}\text{H}_{24}\text{ClN}_2\text{O}_6$  [ $\text{M}+\text{H}$ ] $^+$  411.1323, found 411.1327.

**(E)-1-(2-Chlorobenzoyloxy)-1,2-di(methoxycarbonyl)ethene 2b**

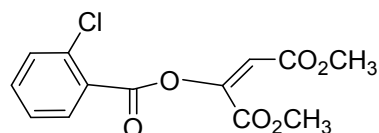

Yield: 9%; white flake, mp: 49-50°C, <sup>1</sup>H NMR (400MHz, CDCl<sub>3</sub>): δ = 8.159-8.140(d, *J* = 7.6Hz, 1H), 7.534-7.502(m, *J* = 6.8Hz, *J* = 7.6Hz, 2H), 7.412-7.371(m, *J* = 4.0Hz, *J* = 8.0Hz, 1H), 6.810(s, 1H), 3.880(s, 3H), 3.754(s, 3H); <sup>13</sup>C NMR (100MHz, CDCl<sub>3</sub>): δ = 163.2, 161.9, 161.6, 146.6, 135.1, 133.9, 132.7, 131.5, 127.5, 126.9, 117.6, 53.5, 52.4; IR (KBr, cm<sup>-1</sup>): 3088 (w, =C-H), 2955, 2925(w, C-H), 1737(s, C=O), 1663 (s), 1591 (m, Ar), 1437(w, CH<sub>3</sub>), 1278, 1203 (m, C-O), 1105, 1032(m, C-N), 773, 745 (s, Ar); MS m/z(%): 298(0.2)(M<sup>+</sup>), 259(5), 141(33), 139(100), 113(3), 111(10), 75(6), 44(13). **HRMS** (ESI) calcd for C<sub>13</sub>H<sub>12</sub>ClO<sub>6</sub> [M+H]<sup>+</sup> 299.0322, found 299.0326.

**1-[(*E*)-1,2-(Dimethoxycarbonyl)ethen-1-yl]-4-[2-[2-(naphthalen-2-yloxy)acetoxy]eth-1-yl]piperazine 3a**

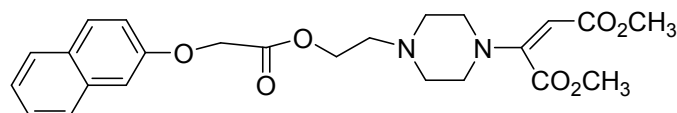

Yield: 72%; light yellow sticky clumps, <sup>1</sup>H NMR (400MHz, CDCl<sub>3</sub>): δ = 7.793-7.765(dd, *J* = 8.8Hz, *J* = 2.4Hz, 2H), 7.714-7.693(d, *J* = 8.4Hz, 1H), 7.473-7.436(t, *J* = 7.6Hz, 1H), 7.389-7.352(t, *J* = 7.6Hz, 1H), 7.233-7.205(dd, *J* = 8.8Hz, *J* = 2.4Hz, 1H), 7.072-7.066(d, *J* = 2.4Hz, 1H) 4.776 (s, 2H), 4.682(s, 1H), 4.351-4.324(t, *J* = 5.6Hz, 2H), 3.906(s, 3H), 3.650(s, 3H), 3.017-2.992(t, *J* = 5.2Hz, 4H), 2.659-2.632(t, *J* = 5.2Hz, 2H), 2.458-2.433(t, *J* = 5.2Hz, 4H); <sup>13</sup>C NMR (100MHz, CDCl<sub>3</sub>): δ = 169.1, 168.2, 166.2, 155.8, 154.5, 134.3, 130.0, 129.6, 127.9, 127.0, 126.9, 124.4, 118.7, 107.1, 86.8, 65.5, 62.5, 56.4, 53.2, 52.3, 51.2, 47.0; IR (KBr, cm<sup>-1</sup>): 3057(w, =C-H), 2924, 2853(w, C-H), 1741, 1687(s, C=O), 1590(s), 1443 (m, Ar), 1370(w, CH<sub>3</sub>), 1268 (m, C-O), 1157, 1120 (m, C-N), 842, 795 (s, Ar); MS m/z(%): 456(6.85) (M<sup>+</sup>), 425(2.08), 370(5.89), 284(6.46), 272(9.08), 242(13.79), 241 (100.00), 229(7.95), 209(16.64), 202(61.70), 201(40.67), 181(22.62), 157(16.28), 149(37.46), 144(76.73), 115(38.99) 100(11.44), 45(10.10), 44(42.29). **HRMS** (ESI) calcd for C<sub>24</sub>H<sub>29</sub>N<sub>2</sub>O<sub>7</sub> [M+H]<sup>+</sup> 457.1975, found 457.1979.

**(*E*)-1,2-Di(methoxycarbonyl)-1-(2-(naphthalen-2-yloxy)acetoxy)ethene 3b**

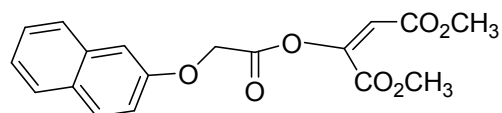

Yield: 16%; white flake, mp: 67-68°C, <sup>1</sup>H NMR (400MHz, CDCl<sub>3</sub>): δ = 7.782-7.752(m, *J* = 3.6Hz, *J* = 8.0Hz, 3H), 7.457-7.417(m, 1H), 7.368-7.328(m, *J* = 1.2Hz, *J* = 8.0Hz, 1H), 7.275-7.236(m, 2H), 6.767(s, 1H), 5.043(s, 2H), 3.813(s, 3H), 3.757(s, 3H); <sup>13</sup>C NMR (100MHz, CDCl<sub>3</sub>): δ = 166.2, 163.2, 161.3, 155.6, 146.2, 134.4, 129.8, 129.6, 127.8, 127.2, 126.6, 124.3, 118.7, 117.9, 107.6, 64.9, 53.5, 52.4; IR (KBr, cm<sup>-1</sup>): 3088 (w, =C-H), 2956(w, C-H), 1737(s, C=O), 1663(s), 1437(m, Ar), 1348(w, CH<sub>3</sub>), 1277 (m, C-O), 1105, 1032(m, C-N), 871, 745 (s, Ar); MS m/z(%): 344(100)(M<sup>+</sup>), 285(1), 201(5), 185(14), 157(85), 143(9), 129(37), 127(68), 115(12), 101(7), 69(7), 45(15), 44(22). **HRMS** (ESI) calcd for C<sub>18</sub>H<sub>17</sub>O<sub>7</sub> [M+H]<sup>+</sup> 345.0974, found 345.0978.

**1-[(*E*)-1,2-(Dimethoxycarbonyl)ethen-1-yl]-4-[2-(naphthalenoyloxy)eth-1-yl]piperazine 4a**

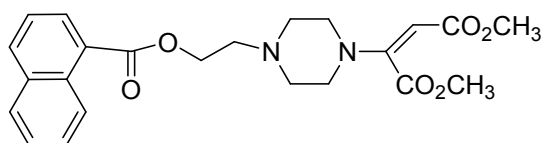

Yield: 82%; light yellow sticky clumps,  $^1\text{H NMR}$  (400MHz,  $\text{CDCl}_3$ ):  $\delta$  = 8.913-8.892(d,  $J$  = 8.4Hz, 1H), 8.148-8.127(dd,  $J$  = 7.2Hz,  $J$  = 1.2Hz, 1H), 8.018-7.998(d,  $J$  = 8Hz, 1H), 7.881-7.861(d,  $J$  = 8Hz, 1H), 7.617-7.575(dt,  $J$  = 1.6Hz,  $J$  = 8.4Hz, 1H), 7.542-7.468(m, 2H), 4.770(s, 1H), 4.527-4.499(t,  $J$  = 5.6Hz, 2H), 3.911(s, 3H), 3.634(s, 3H), 3.181-3.156(t,  $J$  = 4.8Hz, 4H), 2.819-2.791(t,  $J$  = 5.6Hz, 2H), 2.623-2.598(t,  $J$  = 4.8Hz, 4H);  $^{13}\text{C NMR}$  (100MHz,  $\text{CDCl}_3$ ):  $\delta$  = 168.0, 167.4, 166.1, 154.5, 133.8, 133.4, 131.2, 130.1, 128.6, 127.8, 127.2, 126.3, 125.7, 124.5, 86.4, 61.9, 56.5, 53.0, 52.2, 51.0, 47.1; IR (KBr,  $\text{cm}^{-1}$ ): 3090(w, =C-H), 2950, 2904(w, C-H), 1743, 1700 (s, C=O), 1582(s), 1438 (m, Ar), 1370(w,  $\text{CH}_3$ ), 1278, 1244 (m, C-O), 1196, 1162(m, C-N), 868, 784 (s, Ar); MS  $m/z$ (%): 426(5) ( $\text{M}^+$ ), 408(7), 395(6), 341(4), 340(24), 255(6), 254(13), 242(21), 241(100), 195(15), 181(15), 155(49), 127(16), 44(15). **HRMS** (ESI) calcd for  $\text{C}_{23}\text{H}_{27}\text{N}_2\text{O}_6$  [ $\text{M}+\text{H}$ ] $^+$  427.1869, found 427.1876.

**(E)-1,2-Di(methoxycarbonyl)-1-(1-naphthalenecarbonyloxy)ethene 4b**

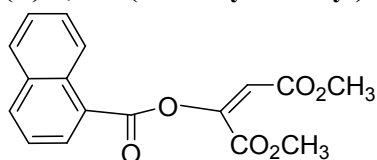

Yield: 12%; white flake, mp: 63-64°C,  $^1\text{H NMR}$  (400MHz,  $\text{CDCl}_3$ ):  $\delta$  = 8.944-8.923(d,  $J$  = 8.4Hz, 1H), 8.478-8.457(m, 1H), 8.093-8.072(d,  $J$  = 8.4Hz, 1H), 7.903-7.883(d,  $J$  = 8.0Hz, 1H), 7.657-7.615(m, 1H), 7.570-7.531(m, 2H), 6.839(s, 1H), 3.874(s, 3H), 3.723(s, 3H);  $^{13}\text{C NMR}$  (100MHz,  $\text{CDCl}_3$ ):  $\delta$  = 164.3, 163.5, 161.9, 147.1, 134.8, 133.9, 131.9, 131.7, 128.8, 128.5, 126.6, 125.6, 124.8, 124.7, 117.4, 53.5, 52.3; IR (KBr,  $\text{cm}^{-1}$ ): 3089 (w, =C-H), 2954(w, C-H), 1734(s, C=O), 1661(s), 1437 (m, Ar), 1345(w,  $\text{CH}_3$ ), 1377(m), 1246 (m, C-O), 1110, 1022(m, C-N), 807, 781 (s, Ar); MS  $m/z$ (%): 314(5) ( $\text{M}^+$ ), 186(4), 156(11), 155(100), 143(8), 127(31), 126(6), 101(4), 77 (3), 69(2), 44(2). **HRMS** (ESI) calcd for  $\text{C}_{17}\text{H}_{15}\text{O}_6$  [ $\text{M}+\text{H}$ ] $^+$  315.0869, found 315.0862.

**1-[(E)-1,2-(Dimethoxycarbonyl)ethen-1-yl]-4-[2-((2-(naphthalen-1-yl)acetoxyl)eth-1-yl)]piperazine 5a**

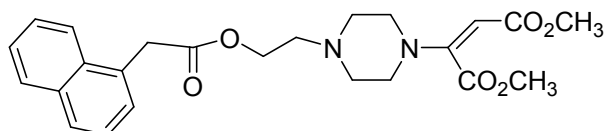

Yield: 62%; light yellow sticky clumps,  $^1\text{H NMR}$  (400MHz,  $\text{CDCl}_3$ ):  $\delta$  = 7.985-7.966(d,  $J$  = 8Hz, 1H), 7.861-7.841(d,  $J$  = 8Hz, 1H), 7.782-7.764(d,  $J$  = 7.2Hz, 1H), 7.526-7.461(m, 2H), 7.430-7.380(m, 2H), 4.669(s, 1H), 4.175-4.149(t,  $J$  = 5.2Hz, 2H), 4.052(s, 2H), 3.906(s, 3H), 3.638(s, 3H), 2.847-2.836(m, 4H), 2.472-2.447(t,  $J$  = 5.2Hz, 2H), 2.192-2.170(t,  $J$  = 4.4Hz, 4H);  $^{13}\text{C NMR}$  (100MHz,  $\text{CDCl}_3$ ):  $\delta$  = 171.2, 168.1, 166.0, 154.4, 133.7, 132.0, 130.5, 128.7, 128.1, 128.0, 126.4, 125.9, 125.5, 123.8, 86.1, 62.2, 56.1, 53.0, 51.8, 50.9, 46.7, 39.3; IR (KBr,  $\text{cm}^{-1}$ ): 3048(w, =C-H), 2950, 2842(w, C-H), 1741, 1696 (s, C=O), 1583(s), 1438 (m, Ar), 1370(w,  $\text{CH}_3$ ), 1275, 1246 (m, C-O), 1214, 1160(m, C-N), 826, 732 (s, Ar); MS  $m/z$ (%):

440(16) (M<sup>+</sup>), 409(8), 381(4), 354(29), 269(4), 268(22), 256(19), 241(100), 239(5), 213(26), 209(13), 195(8), 181(17), 168(14), 142(6), 141(48), 140(13), 115(6), 44(28). **HRMS** (ESI) calcd for C<sub>24</sub>H<sub>29</sub>N<sub>2</sub>O<sub>6</sub> [M+H]<sup>+</sup> 441.2026, found 441.2032.

**1-[2-(2-Acetoxybenzoyloxy)eth-1-yl]-4-[(E)-1,2-(dimethoxycarbonyl)ethen-1-yl]piperazine 6a**

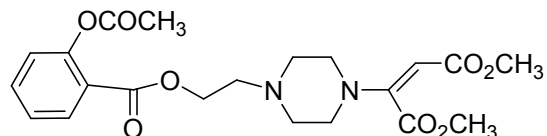

Yield: 43%; light yellow sticky clumps, <sup>1</sup>H NMR (400MHz, CDCl<sub>3</sub>): δ = 8.000-7.976(dd, *J* = 8Hz, *J* = 1.6Hz, 1H), 7.596-7.553(m, 1H), 7.340-7.302(m, 1H), 7.122-7.102(d, *J* = 8Hz, 1H), 4.769(s, 1H), 4.400-4.372(t, *J* = 5.6Hz, 2H), 3.910(s, 3H), 3.629(s, 3H), 3.176-3.152(t, *J* = 4.8Hz, 4H), 2.756-2.728(t, *J* = 5.6Hz, 2H), 2.593-2.569(t, *J* = 4.8Hz, 4H), 2.349(s, 3H); <sup>13</sup>C NMR (100MHz, CDCl<sub>3</sub>): δ = 169.5, 168.0, 166.0, 164.2, 154.4, 150.7, 134.0, 131.6, 126.0, 123.8, 123.0, 86.3, 62.1, 56.3, 52.9, 52.2, 50.9, 47.0, 21.0; IR (KBr, cm<sup>-1</sup>): 3083(w, =C-H), 2950, 2849(w, C-H), 1743, 1696(s, C=O), 1583(s), 1485, 1450, 1439 (m, Ar), 1369(w, CH<sub>3</sub>), 1293, 1258, 1159 (m, C-O), 1085, 1042(m, C-N), 753, 732 (s, Ar); MS m/z(%): 434(6) (M<sup>+</sup>), 403(6), 375(3), 348 (26), 262(8), 250(14), 254(5), 241(100), 239(7), 209 (16), 195(10), 181(21), 163(14), 140(6), 121(22), 120(3), 82(6), 56(6), 44(22); **HRMS** (ESI) calcd for C<sub>21</sub>H<sub>27</sub>N<sub>2</sub>O<sub>8</sub> [M+H]<sup>+</sup> 435.1767, found 435.1768.

**1-[2-(4-Fluorobenzoyloxy)eth-1-yl]-4-[(E)-1,2-(dimethoxycarbonyl)ethen-1-yl]piperazine 7a**

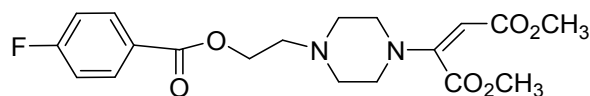

Yield: 89%; light yellow sticky clumps, <sup>1</sup>H NMR (400MHz, CDCl<sub>3</sub>): δ = 8.061-8.025(m, 2H), 7.148-7.105(t, *J* = 8.8Hz, 2H), 4.784(s, 1H), 4.462-4.434(t, *J* = 5.6Hz, 2H), 3.921(s, 3H), 3.634(s, 3H), 3.203-3.178(t, *J* = 4.8Hz, 4H), 2.818-2.789(t, *J* = 5.6Hz, 2H), 2.646-2.621(t, *J* = 4.8Hz, 4H); <sup>13</sup>C NMR (100MHz, CDCl<sub>3</sub>): δ = 167.9, 166.9, 166.0, 165.3, 164.4, 154.4, 132.1, 132.0, 126.3, 126.2, 115.6, 115.4, 86.3, 62.2, 56.4, 52.9, 52.2, 50.8, 47.0; IR(KBr, cm<sup>-1</sup>): 3080(w, =C-H), 2951, 2906(w, C-H), 1742, 1720, 1693(s, C=O), 1583(s), 1439 (m, Ar), 1371(w, CH<sub>3</sub>), 1273, 1216 (m, C-O), 1160, 1114 (m, C-N), 857, 732 (s, Ar); MS m/z(%): 394(6) (M<sup>+</sup>), 363(11), 335(6), 308(28), 254(7), 242(11), 241(100), 222(18), 209(16), 195(9), 181(21), 167(37), 123(33), 95(9), 82(7), 56(7). **HRMS** (ESI) calcd for C<sub>19</sub>H<sub>24</sub>FN<sub>2</sub>O<sub>6</sub> [M+H]<sup>+</sup> 395.1618, found 395.1626.

**1-[2-(Cinnamoyloxy)eth-1-yl]-4-[(E)-1,2-(dimethoxycarbonyl)ethen-1-yl]piperazine 8a**

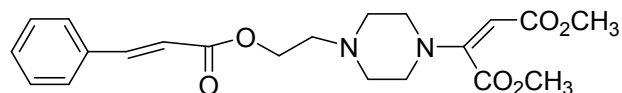

Yield: 59%; light yellow sticky clumps, <sup>1</sup>H NMR (400MHz, CDCl<sub>3</sub>): δ = 7.713-7.673(d, *J* = 16Hz, 1H), 7.542-7.520(dd, *J* = 5.6Hz, *J* = 3.2Hz, 2H), 7.399-7.383(t, *J* = 3.2Hz, 3H), 6.476-6.436(d, *J* = 16Hz, 1H), 4.781(s, 1H), 4.354-4.325(t, *J* = 5.6Hz, 2H), 3.921(s, 3H), 3.638(s, 3H), 3.208-3.183(t, *J* = 4.8Hz, 4H), 2.755-2.727(t, *J* = 5.6Hz, 2H), 2.622-2.597(t, *J* = 4.8Hz, 4H); <sup>13</sup>C NMR (100MHz, CDCl<sub>3</sub>): δ = 168.1, 166.9, 166.1, 154.5, 145.3, 134.3, 130.5, 129.0,

128.2, 117.8, 86.5, 61.6, 56.6, 53.1, 52.3, 51.0, 47.1; IR (KBr,  $\text{cm}^{-1}$ ): 3085(w, =C-H), 2952, 2848(w, C-H), 1744, 1713, 1689 (s, C=O), 1586(s), 1450, 1435 (m, Ar), 1371(w,  $\text{CH}_3$ ), 1310, 1279 (m, C-O), 1196, 1162(m, C-N), 868, 784 (s, Ar); MS  $m/z(\%)$ : 402(4) ( $\text{M}^+$ ), 371(7), 316(22), 242(12), 241(100), 230(9), 209(14), 195(13), 181(18), 175(10), 149(11), 131(38), 103(11), 44(28). **HRMS** (ESI) calcd for  $\text{C}_{21}\text{H}_{27}\text{N}_2\text{O}_6$  [ $\text{M}+\text{H}$ ] $^+$  403.1869, found 403.1876.

**1-[2-(4-Cyanobenzoyloxy)eth-1-yl]-4-[(E)-1,2-(dimethoxycarbonyl)ethen-1-yl]piperazine 9a**

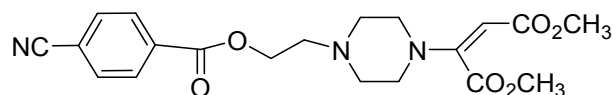

Yield: 57%; yellow solid, mp: 105-106°C,  $^1\text{H}$ NMR (400MHz,  $\text{CDCl}_3$ ):  $\delta$  = 8.151-8.130(d,  $J$  = 8.4Hz, 2H), 7.793-7.772(d,  $J$  = 8.4Hz, 2H), 4.785(s, 1H), 4.515-4.487(t,  $J$  = 5.6Hz, 2H), 3.923(s, 3H), 3.631(s, 3H), 3.205-3.180(t,  $J$  = 4.8Hz, 4H), 2.841-2.813(t,  $J$  = 5.6Hz, 2H), 2.652-2.628(t,  $J$  = 4.8Hz, 4H);  $^{13}\text{C}$  NMR (100MHz,  $\text{CDCl}_3$ ):  $\delta$  = 167.9, 165.9, 164.7, 154.4, 133.8, 132.2, 130.0, 117.9, 116.3, 86.3, 62.6, 56.2, 52.9, 52.1, 50.8, 47.0; IR (KBr,  $\text{cm}^{-1}$ ): 3095(w, =C-H), 2951, 2921(w, C-H), 2232(m, -CN), 1740, 1717, 1695(s, C=O), 1585(s), 1439(m, Ar), 1371(w,  $\text{CH}_3$ ), 1310, 1275 (m, C-O), 1161, 1109(m, C-N), 914, 733(s, Ar); MS  $m/z(\%)$ : 401(4) ( $\text{M}^+$ ), 370(9), 320(10), 315(22), 254(8), 242(13), 241(100), 229(19), 222(7), 209(15), 195(11), 181(20), 174(29), 152(7), 140(13), 135(23), 82(10), 57(9), 44(21). **HRMS** (ESI) calcd for  $\text{C}_{20}\text{H}_{24}\text{N}_3\text{O}_6$  [ $\text{M}+\text{H}$ ] $^+$  402.1665, found 402.1666.

**1-[1-(4-Methoxybenzoyloxy)eth-2-yl]-4-[(E)-1,2-(dimethoxycarbonyl)ethen-1-yl]piperazine 10a**

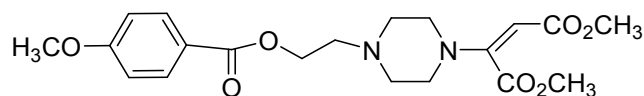

Yield: 75%; light brown sticky clumps,  $^1\text{H}$ NMR (400MHz,  $\text{CDCl}_3$ ):  $\delta$  = 7.985-7.962(d,  $J$  = 9.2Hz, 2H), 6.938-6.916(d,  $J$  = 8.8Hz, 2H), 4.773(s, 1H), 4.433-4.405(t,  $J$  = 5.6Hz, 2H), 3.918(s, 3H), 3.862(s, 3H), 3.637(s, 3H), 3.192-3.166(t,  $J$  = 5.2Hz, 4H), 2.802-2.774(t,  $J$  = 5.6Hz, 2H), 2.637-2.612(t,  $J$  = 5.2Hz, 4H);  $^{13}\text{C}$  NMR (100MHz,  $\text{CDCl}_3$ ):  $\delta$  = 168.1, 166.2, 166.1, 163.5, 154.6, 131.7, 122.5, 113.8, 86.5, 62.0, 56.6, 55.5, 53.0, 52.4, 51.0, 47.2; IR (KBr,  $\text{cm}^{-1}$ ): 3058, 2951(w, =C-H), 2841(w, C-H), 1744, 1708(s, C=O), 1605, 1583(s), 1512, 1439, 1421(m, Ar), 1371(w,  $\text{CH}_3$ ), 1315(m), 1276, 1258, 1215, 1167(m, C-O), 1104, 1027(m, C-N), 849, 736 (s, Ar); MS  $m/z(\%)$ : 406(3.9) ( $\text{M}^+$ ), 375(7.8), 347(2.5), 320(19.9), 254(15.2), 241(100), 222(11.9), 209(14), 195(16), 181(19), 179(14), 168(8), 152(8), 135(60), 107(4), 82(7), 77(4), 44(9). **HRMS** (ESI) calcd for  $\text{C}_{20}\text{H}_{27}\text{N}_2\text{O}_7$  [ $\text{M}+\text{H}$ ] $^+$  407.1818, found 407.1822.

**1-[2-(2-Hydroxy-2-phenylacetoyloxy)eth-1-yl]-4-[(E)-1,2-(dimethoxycarbonyl)ethen-1-yl]piperazine 11a**

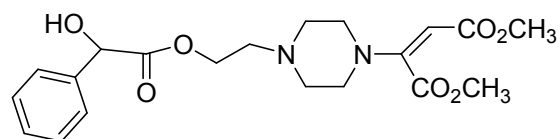

Yield: 79%; light yellow sticky clumps,  $^1\text{H}$ NMR (400MHz,  $\text{CDCl}_3$ ):  $\delta$  = 7.425-7.407(d,  $J$  = 7.2Hz, 2H), 7.355-7.304(m, 3H), 7.321(s, 1H), 5.175(s, 1H), 4.702(s, 1H), 4.358-4.302(m, 1H), 4.181-4.127(m, 1H), 3.896(s, 3H), 3.619(s, 3H), 2.977-2.953(t,  $J$  = 4.8Hz, 4H), 2.526(m,

2H), 2.368-2.316(m, 2H), 2.285-2.233(m, 2H);  $^{13}\text{C}$  NMR (100MHz,  $\text{CDCl}_3$ ):  $\delta$  = 173.1, 168.0, 165.9, 154.3, 138.4, 128.5, 128.4, 126.7, 86.1, 72.9, 62.7, 55.9, 52.9, 51.8, 50.9, 46.7; IR (KBr,  $\text{cm}^{-1}$ ): 3457(b, s, -OH), 3090, 2951, 2921 (w, =C-H), 2849(w, C-H), 1740, 1695(s, C=O), 1583(s), 1494, 1439 (m, Ar), 1370(w,  $\text{CH}_3$ ), 1277(m, C-O), 1160(m, C-N), 914, 732 (s, Ar); MS  $m/z$ (%): 406(12) ( $\text{M}^+$ ), 375(10), 347(3), 321(5), 320(31), 255(9), 242(11), 241(100), 234(2), 222(19), 209(17), 195(13), 181(21), 179(11), 168(7), 140(10), 107(7), 79(10), 56(7), 44(52). **HRMS** (ESI) calcd for  $\text{C}_{20}\text{H}_{27}\text{N}_2\text{O}_7$  [ $\text{M}+\text{H}$ ] $^+$  407.1818, found 407.1824.

**1-[2-(2-Bromobenzoyloxy)eth-1-yl]-4-[(E)-1,2-(dimethoxycarbonyl)ethen-1-yl]piperazine 12a**

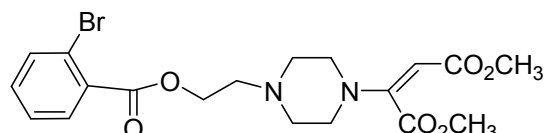

Yield: 84%; light yellow sticky clumps,  $^1\text{H}$ NMR(400MHz,  $\text{CDCl}_3$ ):  $\delta$  = 7.773-7.749(dd,  $J$  = 7.6Hz,  $J$  = 2Hz, 1H), 7.669-7.647(dd,  $J$  = 7.6Hz,  $J$  = 1.2Hz, 1H), 7.339-7.321(m, 2H), 4.773(s, 1H), 4.476-4.448(t,  $J$  = 5.6Hz, 2H), 3.914(s, 3H), 3.630(s, 3H), 3.189-3.164(t,  $J$  = 4.8Hz, 4H), 2.798-2.770(t,  $J$  = 5.6Hz, 2H), 2.623-2.598(t,  $J$  = 4.8Hz, 4H);  $^{13}\text{C}$  NMR (100MHz,  $\text{CDCl}_3$ ):  $\delta$  = 167.9, 165.9, 154.4, 134.2, 132.6, 132.1, 131.1, 127.2, 121.4, 86.2, 62.3, 56.2, 52.9, 52.1, 50.8, 47.0; IR (KBr,  $\text{cm}^{-1}$ ): 3090, 2950(w, =C-H), 2843(w, C-H), 1740, 1696(s, C=O), 1584(s), 1436, 1370(m, Ar), 1250, 1215, 1161(m, C-O), 1110, 1025(m, C-N), 747, 733 (s, Ar); MS  $m/z$ (%): 454(4) ( $\text{M}^+$ ), 456(3)( $\text{M}+2$ ), 423(6), 395(3), 368(15), 282(10), 270(8), 242(12), 241(100), 227(18), 209(13), 195(9), 185(22), 181(18), 44(11). **HRMS** (ESI) calcd for  $\text{C}_{19}\text{H}_{24}\text{BrN}_2\text{O}_6$  [ $\text{M}+\text{H}$ ] $^+$  455.0818, found 455.0820.

**1-[1-(2-Methoxybenzoyloxy)eth-2-yl]-4-[(E)-1,2-(dimethoxycarbonyl)ethen-1-yl]piperazine 13a**

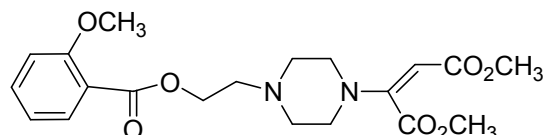

Yield: 64%; light yellow sticky clumps,  $^1\text{H}$  NMR(400MHz,  $\text{CDCl}_3$ ):  $\delta$  = 7.783-7.759(dd,  $J$  = 8Hz,  $J$  = 1.6Hz, 1H), 7.503-7.460(m, 1H), 6.999-6.965(m, 2H), 4.774(s, 1H), 4.435-4.407(t,  $J$  = 5.6Hz, 2H), 3.913(s, 3H), 3.887(s, 3H), 3.629(s, 3H), 3.188-3.163(t,  $J$  = 4.8Hz, 4H), 2.789-2.761(t,  $J$  = 5.6Hz, 2H), 2.632-2.608(t,  $J$  = 4.8Hz, 4H);  $^{13}\text{C}$  NMR (100MHz,  $\text{CDCl}_3$ ):  $\delta$  = 167.9, 166.0, 165.8, 159.0, 154.4, 133.6, 131.4, 120.0, 119.7, 111.9, 86.1, 61.9, 56.3, 55.8, 52.9, 52.1, 50.8, 47.0; IR(KBr,  $\text{cm}^{-1}$ ): 3082(w, =C-H), 2950, 2840(w, C-H), 1743, 1696(s, C=O), 1584(s), 1492, 1437(m, Ar), 1370, 1300(w,  $\text{CH}_3$ ), 11258, 1215, 1160(m, C-O), 1092, 1047, 1022(m, C-N), 757, 732(s, Ar); MS  $m/z$ (%): 406(3) ( $\text{M}^+$ ), 375(7), 320(20), 254(14), 241(100), 209(14), 195(17), 181(20), 179(14), 152(10), 135(67), 85(30), 71(34), 57(35), 44(63). **HRMS** (ESI) calcd for  $\text{C}_{20}\text{H}_{27}\text{N}_2\text{O}_7$  [ $\text{M}+\text{H}$ ] $^+$  407.1818, found 407.1819.

**1-[2-(3-Methoxybenzoyloxy)eth-1-yl]-4-[(E)-1,2-(dimethoxycarbonyl)ethen-1-yl]piperazine 14a**

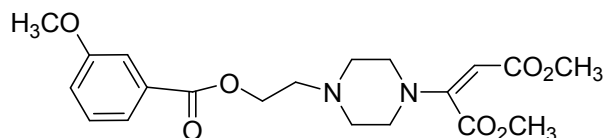



Yield: 74%; light yellow sticky clumps,  $^1\text{H NMR}$  (400MHz,  $\text{CDCl}_3$ ):  $\delta$  = 7.617-7.598(d,  $J$  = 8Hz, 1H), 7.536(s, 1H), 7.374-7.334(t,  $J$  = 8Hz, 1H), 7.121-7.096(dd,  $J$  = 8Hz, d,  $J$  = 2Hz, 1H), 4.775(s, 1H), 4.455-4.427(t,  $J$  = 5.6Hz, 2H), 3.914(s, 3H), 3.840(s, 3H), 3.629(s, 3H), 3.187-3.164(t,  $J$  = 4.8Hz, 4H), 2.806-2.778(t,  $J$  = 5.6Hz, 2H), 2.632-2.609(t,  $J$  = 4.8Hz, 4H);  $^{13}\text{C NMR}$  (100MHz,  $\text{CDCl}_3$ ):  $\delta$  = 167.9, 166.1, 165.9, 159.4, 154.4, 131.2, 129.4, 121.7, 119.2, 114.1, 86.1, 62.2, 56.3, 55.3, 52.9, 52.1, 50.8, 47.0; IR (KBr,  $\text{cm}^{-1}$ ): 3084(w, =C-H), 2950, 2838(w, C-H), 1743, 1720, 1697(s, C=O), 1583(s), 1489, 1451, 1437(m, Ar), 1371(w,  $\text{CH}_3$ ), 1279(m), 1220, 1161 (m, C-O), 1107, 1079, 1044(m, C-N), 756, 733(s, Ar); MS  $m/z$ (%): 406(4) ( $\text{M}^+$ ), 375(8), 320(30), 242(12), 241(100), 222(16), 209(13), 195(10), 181(18), 179(22), 135(38), 44(12). **HRMS** (ESI) calcd for  $\text{C}_{20}\text{H}_{27}\text{N}_2\text{O}_7$  [ $\text{M}+\text{H}$ ] $^+$  407.1818, found 407.1823.

**1-[2-(3-Chlorobenzoyloxy)eth-1-yl]-4-[(E)-1,2-(dimethoxycarbonyl)ethen-1-yl]piperazine 15a**

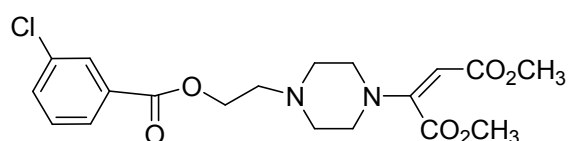

Yield: 85%; yellow flake, mp: 64-65°C,  $^1\text{H NMR}$ (400MHz,  $\text{CDCl}_3$ ):  $\delta$  = 7.982(s, 1H), 7.916-7.896(d,  $J$  = 8Hz, 1H), 7.551-7.531(d,  $J$  = 8Hz, 1H), 7.422-7.382(t,  $J$  = 8Hz, 1H), 4.780(s, 1H), 4.470-4.441(t,  $J$  = 5.6Hz, 2H), 3.921(s, 3H), 3.633(s, 3H), 3.197-3.173(t,  $J$  = 4.8Hz, 4H), 2.813-2.785(t,  $J$  = 5.6Hz, 2H), 2.636-2.611(t,  $J$  = 4.8Hz, 4H);  $^{13}\text{C NMR}$  (100MHz,  $\text{CDCl}_3$ ):  $\delta$  = 167.9, 166.0, 165.1, 154.4, 134.4, 133.0, 131.7, 129.8, 129.5, 127.6, 86.3, 62.3, 56.3, 52.9, 52.2, 50.8, 47.0; IR (KBr,  $\text{cm}^{-1}$ ): 3072(w, =C-H), 2950, 2904, 2838(w, C-H), 1744, 1723, 1696(s, C=O), 1583(s), 1437, 1371(m, Ar), 1258, 1214, 1161(m, C-O), 1109, 1087(m, C-N), 751, 734 (s, Ar); MS  $m/z$ (%): 410(4) ( $\text{M}^+$ ), 379(7), 351(4), 326(9), 324(26), 254(6), 242(11), 241(100), 238(19), 209(15), 195(9), 185(17), 183(26), 181(21), 140(11), 139(33), 44(7). **HRMS** (ESI) calcd for  $\text{C}_{19}\text{H}_{24}\text{ClN}_2\text{O}_6$  [ $\text{M}+\text{H}$ ] $^+$  411.1323, found 411.1329.

**1-[2-(2-Fluorobenzoyloxy)eth-1-yl]-4-[(E)-1,2-(dimethoxycarbonyl)ethen-1-yl]piperazine 16a**

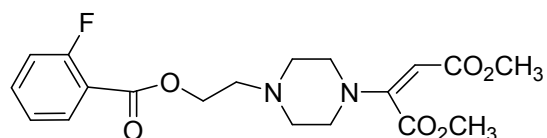

Yield: 81%; light yellow sticky clumps,  $^1\text{H NMR}$ (400MHz,  $\text{CDCl}_3$ ):  $\delta$  = 7.941-7.900(m, 1H), 7.571-7.516(m, 1H), 7.243-7.125(m, 2H), 4.781(s, 1H), 4.480-4.452(t,  $J$  = 5.6Hz, 2H), 3.919(s, 3H), 3.630(s, 3H), 3.196-3.172(t,  $J$  = 4.8Hz, 4H), 2.811-2.784(t,  $J$  = 5.6Hz, 2H), 2.647-2.623(t,  $J$  = 4.8Hz, 4H);  $^{13}\text{C NMR}$ (100MHz,  $\text{CDCl}_3$ ):  $\delta$  = 167.9, 165.9, 164.1, 164.0, 163.0, 160.4, 154.4, 134.6, 134.5, 131.9, 124.0, 123.9, 118.5, 118.4, 117.0, 116.8, 86.1, 62.5, 56.2, 52.9, 52.1, 50.8, 47.0; IR (KBr,  $\text{cm}^{-1}$ ): 3089(w, =C-H), 2951, 2914, 2845(w, C-H), 1743, 1696(s, C=O), 1612, 1586(s), 1489, 1454, 1438(m, Ar), 1371(w,  $\text{CH}_3$ ), 1297, 1254, 1216, 1159(m, C-O), 1127, 1092(m, C-N), 758, 732(s, Ar); MS  $m/z$ (%): 394(6) ( $\text{M}^+$ ), 363(11), 335(6), 308(33), 254(6), 242(11), 241(100), 222(29), 210(21), 195(10), 181(21), 167(42), 140(10), 123(39), 44(19). **HRMS** (ESI) calcd for  $\text{C}_{19}\text{H}_{24}\text{FN}_2\text{O}_6$  [ $\text{M}+\text{H}$ ] $^+$  395.1618, found 395.1611.

**1-[(E)-1,2-(Dimethoxycarbonyl)ethen-1-yl]-4-[2-(3-methylbenzoyloxy)eth-1-yl]piperazine 17a**

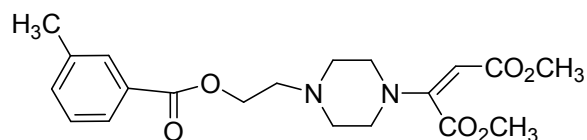

Yield: 75%; light yellow sticky clumps,  $^1\text{H NMR}$  (400MHz,  $\text{CDCl}_3$ ):  $\delta$  = 7.834-7.807(d,  $J$  = 10.8Hz, 2H), 7.386-7.311(m, 2H), 4.776(s, 1H), 4.453-4.425(t,  $J$  = 5.6Hz, 2H), 3.916(s, 3H), 3.631(s, 3H), 3.190-3.165(t,  $J$  = 4.8Hz, 4H), 2.808-2.780(t,  $J$  = 4.8Hz, 2H), 2.635-2.610(t,  $J$  = 5.6Hz, 4H), 2.401(s, 3H);  $^{13}\text{C NMR}$ (100MHz,  $\text{CDCl}_3$ ):  $\delta$  = 168.0, 166.5, 166.0, 154.5, 138.1, 133.8, 130.0, 129.9, 128.3, 126.6, 86.2, 62.1, 56.4, 52.9, 52.2, 50.9, 47.0, 21.3; IR (KBr,  $\text{cm}^{-1}$ ): 3058(w, =C-H), 2950, 2922, 2849(w, C-H), 1743, 1696(s, C=O), 1589(s), 1439(m, Ar), 1277(m, C-O), 1158, 1109, 1084(m, C-N), 825, 744 (s, Ar); MS  $m/z$ (%): 390(4) ( $\text{M}^+$ ), 304(24), 254(9), 242(12), 241(100), 218(11), 209(15), 195(12), 181(20), 163(26), 119(25), 91(14), 82(7), 44(32). **HRMS** (ESI) calcd for  $\text{C}_{20}\text{H}_{27}\text{N}_2\text{O}_6$  [ $\text{M}+\text{H}$ ] $^+$  391.1869, found 391.1875.

**1-[2-(Benzoyloxy)eth-1-yl]-4-[(E)-1,2-(dimethoxycarbonyl)ethen-1-yl]piperazine 18a**

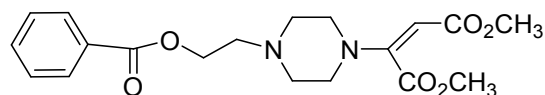

Yield: 89%; colorless sticky clumps,  $^1\text{H NMR}$ (400MHz,  $\text{CDCl}_3$ ):  $\delta$  = 8.034-8.016(d,  $J$  = 7.2Hz, 2H), 7.590-7.553(t,  $J$  = 7.2Hz, 1H), 7.469-7.431(t,  $J$  = 7.2Hz, 2H), 4.778(s, 1H), 4.462-4.434(t,  $J$  = 5.6Hz, 2H), 3.915(s, 3H), 3.630(s, 3H), 3.189-3.164(t,  $J$  = 4.8Hz, 4H), 2.810-2.781(t,  $J$  = 5.6Hz, 2H), 2.635-2.610(t,  $J$  = 4.8Hz, 4H);  $^{13}\text{C NMR}$ (100MHz,  $\text{CDCl}_3$ ):  $\delta$  = 168.0, 166.3, 166.0, 154.4, 133.0, 130.0, 129.5, 128.4, 86.2, 62.2, 56.4, 52.9, 52.2, 50.9, 47.0; IR (KBr,  $\text{cm}^{-1}$ ): 3063 (w, =C-H), 2950, 2846(w, C-H), 1744, 1719, 1696(s, C=O), 1585(s), 1491, 1449(m, Ar), 1275, 1213, 1157(m, C-O), 1111, 1070(m, C-N), 895, 714(s, Ar); MS  $m/z$ (%): 376(4) ( $\text{M}^+$ ), 345(13), 290(20), 254(8), 242(12), 241(100), 209(16), 204(12), 181(21), 149(38), 105(24), 77(9), 56(6), 44(7). **HRMS** (ESI) calcd for  $\text{C}_{19}\text{H}_{25}\text{N}_2\text{O}_6$  [ $\text{M}+\text{H}$ ] $^+$  377.1713, found 377.1718.

**1-[(E)-1,2-(Dimethoxycarbonyl)ethen-1-yl]-4-[2-(2-phenylacetoxy)eth-1-yl]piperazine 19a**

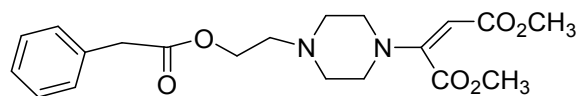

Yield: 74%; colorless sticky clumps,  $^1\text{H NMR}$ (400MHz,  $\text{CDCl}_3$ ):  $\delta$  = 7.328-7.259(m, 5H), 4.737(s, 1H), 4.211-4.184(t,  $J$  = 5.6Hz, 2H), 3.903(s, 3H), 3.623(s, 2H), 3.623(s, 3H), 3.071-3.047(t,  $J$  = 4.8Hz, 4H), 2.602-2.575(t,  $J$  = 5.6Hz, 2H), 2.440-2.416(t,  $J$  = 4.8Hz, 4H);  $^{13}\text{C NMR}$ (100MHz,  $\text{CDCl}_3$ ):  $\delta$  = 171.2, 167.9, 165.9, 154.3, 133.9, 129.2, 128.4, 127.0, 86.1, 61.8, 56.2, 52.8, 52.0, 50.8, 46.9, 41.3; MS  $m/z$ (%): 390(7) ( $\text{M}^+$ ), 359(10), 331(6), 304(30), 242(12), 241(100), 218(23), 206(17), 195(8), 181(19), 163 (29), 91(24), 44(12); IR(KBr,  $\text{cm}^{-1}$ ): 3088 (w, =C-H), 2950, 2842(w, C-H), 1741, 1696(s, C=O), 1582(s), 1497, 1451, 1438 (m, Ar), 1371(w,  $\text{CH}_3$ ), 1315(m), 1276, 1243, 1216, 1159(m, C-O), 1110, 1085, 1041(m, C-N), 867, 754(s, Ar). **HRMS** (ESI) calcd for  $\text{C}_{20}\text{H}_{27}\text{N}_2\text{O}_6$  [ $\text{M}+\text{H}$ ] $^+$  391.1869, found 391.1861.

**1-[(E)-1,2-(Dimethoxycarbonyl)ethen-1-yl]-4-[2-(2-methylbenzoyloxy)eth-1-yl]piperazine 19b**

### yl]piperazine 20a

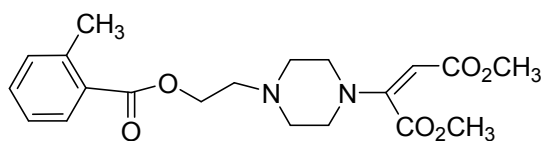

Yield: 66%; light yellow sticky clumps,  $^1\text{H NMR}$ (400MHz,  $\text{CDCl}_3$ ):  $\delta$  = 7.882-7.863(d,  $J$  = 7.2Hz, 1H), 7.417-7.381(t,  $J$  = 7.2Hz, 1H), 7.261-7.234(m, 2H), 4.774(s, 1H), 4.430-4.406(t,  $J$  = 5.6Hz, 2H), 3.912(s, 3H), 3.628(s, 3H), 3.169-3.159(m, 4H), 2.784-2.759(t,  $J$  = 5.6Hz, 2H), 2.604-2.591(m, 7H);  $^{13}\text{C NMR}$ (100MHz,  $\text{CDCl}_3$ ):  $\delta$  = 167.9, 167.3, 166.0, 154.4, 140.0, 132.0, 131.6, 130.4, 129.5, 125.7, 86.2, 61.6, 56.4, 52.9, 52.2, 50.8, 47.0, 21.7; IR(KBr,  $\text{cm}^{-1}$ ): 3058(w, =C-H), 2951, 2843(w, C-H), 1744, 1718, 1699(s, C=O), 1584(s), 1487, 1439 (m, Ar), 1370, 1332, 1294(w,  $\text{CH}_3$ ), 1257, 1215, 1162(m, C-O), 1092, 1045(m, C-N), 799, 739(s, Ar); MS  $m/z$ (%): 390(4) ( $\text{M}^+$ ), 359(8), 304(22), 254(8), 242(12), 241(100), 209(15), 206(11), 181(20), 163(15), 119(29), 91(10), 82(6), 44(13). HRMS (ESI) calcd for  $\text{C}_{20}\text{H}_{27}\text{N}_2\text{O}_6$  [ $\text{M}+\text{H}$ ] $^+$  391.1869, found 391.1865.

### 1-[2-(2-(2,4-Dichlorophenoxy)acetoyloxy)eth-1-yl]-4-[(E)-1,2-(dimethoxycarbonyl)ethen-1-yl]piperazine 21a

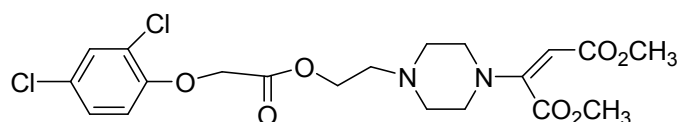

Yield: 69%; light yellow sticky clumps,  $^1\text{H NMR}$ (400MHz,  $\text{CDCl}_3$ ):  $\delta$  = 7.388-7.383(d,  $J$  = 2Hz, 1H), 7.173-7.146(dd,  $J$  = 8.8Hz,  $J$  = 2Hz, 1H), 6.809-6.787(d,  $J$  = 8.8Hz, 1H), 4.763(s, 1H), 4.726(s, 2H), 4.328-4.303(t,  $J$  = 5.2Hz, 2H), 3.913(s, 3H), 3.631(s, 3H), 3.128(m, 4H), 2.657-2.631(t,  $J$  = 5.2Hz, 2H), 2.517(m, 4H);  $^{13}\text{C NMR}$ (100MHz,  $\text{CDCl}_3$ ):  $\delta$  = 167.9, 165.9, 154.3, 152.1, 130.1, 127.5, 126.7, 123.8, 114.3, 86.3, 66.0, 62.2, 56.1, 52.9, 52.0, 50.8, 46.9; IR(KBr,  $\text{cm}^{-1}$ ): 3091(w, =C-H), 2950, 2847(w, C-H), 1742, 1694 (s, C=O), 1585(s), 1479, 1442, 1370(m, Ar), 1159, 1107, 1086 (m, C-O), 1044(m, C-N), 802, 731(s, Ar); MS  $m/z$ (%): 474(4) ( $\text{M}^+$ ), 477(1)( $\text{M}+2$ ), 446(2), 443(11), 415(6), 390(17), 388(26), 304(26), 302(40), 290(13), 254(15), 247(23), 241(100), 209(18), 195(14), 181(23), 140(17), 56(10), 44(24). HRMS (ESI) calcd for  $\text{C}_{20}\text{H}_{25}\text{Cl}_2\text{N}_2\text{O}_7$  [ $\text{M}+\text{H}$ ] $^+$  475.1039, found 475.1043.

### 1-[(E)-1,2-(Dimethoxycarbonyl)ethen-1-yl]-4-[2-(2-phenoxyacetoyloxy)eth-1-yl]piperazine 22a

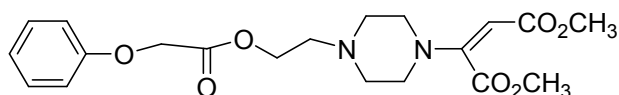

Yield: 72%; light yellow sticky clumps,  $^1\text{H NMR}$ (400MHz,  $\text{CDCl}_3$ ):  $\delta$  = 7.321-7.255(m, 2H), 7.007-6.970(t,  $J$  = 7.6Hz, 1H), 6.904-6.883(m, 2H), 4.747(s, 1H), 4.645(s, 2H), 4.321-4.294(t,  $J$  = 5.6Hz, 2H), 3.907(s, 3H), 3.629(s, 3H), 3.107-3.083(t,  $J$  = 4.8Hz, 4H), 2.641-2.614(t,  $J$  = 5.6Hz, 2H), 2.491-2.466(t,  $J$  = 4.8Hz, 4H);  $^{13}\text{C NMR}$ (100MHz,  $\text{CDCl}_3$ ):  $\delta$  = 168.9, 167.9, 165.9, 157.6, 154.4, 129.5, 121.7, 114.4, 86.2, 65.1, 62.0, 56.2, 52.9, 52.0, 50.9, 46.9; IR(KBr,  $\text{cm}^{-1}$ ): 3058 (w, =C-H), 2951, 2845(w, C-H), 1744, 1696(s, C=O), 1584(s), 1494, 1438(m, Ar), 1371(w,  $\text{CH}_3$ ), 1277(m), 1162(b, s, C-O), 1107, 1089, 1042, 1022(m, C-N), 826, 756 (s, Ar); MS  $m/z$ (%): 406(13) ( $\text{M}^+$ ), 375(15), 347(9), 321(10), 320 (54), 285(7), 254(7), 242(11),

241(100), 234(56), 222(33), 209(17), 185(13), 181(22), 179(32), 140(11), 107(11), 77(9), 56(9), 44(30). **HRMS** (ESI) calcd for  $C_{20}H_{27}N_2O_7$   $[M+H]^+$  407.1818, found 407.1812.

**1-[(E)-1,2-(Dimethoxycarbonyl)ethen-1-yl]-4-{2-[2-(naphthalen-1-yloxy)acetoyloxy]eth-1-yl}piperazine 23a**

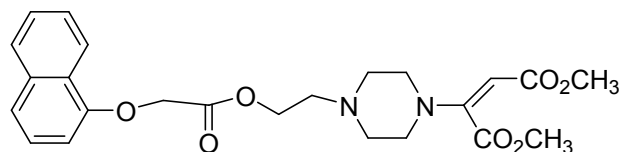

Yield: 75%; light yellow sticky clumps,  $^1H$  NMR(400MHz,  $CDCl_3$ ):  $\delta$  = 8.328-8.304(m, 1H), 7.802-7.779(m, 1H), 7.514-7.437(m, 3H), 7.318-7.279(m, 1H), 6.682-6.663(d,  $J$  = 7.6Hz, 1H), 4.807(s, 2H), 4.668(s, 1H), 4.264-4.238(t,  $J$  = 5.2Hz, 2H), 3.883(s, 3H), 3.632(s, 3H), 2.931-2.907(t,  $J$  = 4.8Hz, 4H), 2.524-2.498(t,  $J$  = 5.2Hz, 2H), 2.326-2.302(t,  $J$  = 4.8Hz, 4H);  $^{13}C$  NMR(100MHz,  $CDCl_3$ ):  $\delta$  = 168.7, 167.9, 165.9, 154.3, 153.3, 134.4, 127.4, 126.6, 125.5, 125.4, 125.3, 121.9, 121.3, 104.7, 86.1, 65.3, 62.3, 56.0, 52.8, 51.9, 50.8, 46.7; IR(KBr,  $cm^{-1}$ ): 3056(w, =C-H), 2950, 2844(w, C-H), 1742, 1695(s, C=O), 1582(s), 1438, 1400, 1371(m, Ar), 1277, 1208, 1160(m, C-O), 1079, 1142, 1022(m, C-N), 794, 732(s, Ar); MS  $m/z$ (%): 456(18) ( $M^+$ ), 425(10), 397(5), 370(29), 330(6), 285(7), 284(36), 271(13), 254(9), 241(100), 229(21), 209(15), 195(11), 143(11), 127(9), 105(6), 82(7), 56(8), 44(21); **HRMS** (ESI) calcd for  $C_{24}H_{29}N_2O_7$   $[M+H]^+$  457.1975, found 457.1971.

**1-[2-(4-Iodobenzoyloxy)eth-1-yl]-4-[(E)-1,2-(dimethoxycarbonyl)ethen-1-yl]piperazine 24a**

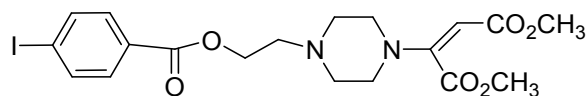

Yield: 74%, light yellow sticky clumps,  $^1H$ NMR(400MHz,  $CDCl_3$ ):  $\delta$  = 7.824-7.803(d,  $J$  = 8.4Hz, 2H), 7.733-7.712(d,  $J$  = 8.4Hz, 2H), 4.772(s, 1H), 4.455-4.426(t,  $J$  = 5.6Hz, 2H), 3.920(s, 3H), 3.641(s, 3H), 3.187-3.162(t,  $J$  = 4.8Hz, 4H), 2.803-2.775(t,  $J$  = 5.6Hz, 2H), 2.629-2.604(t,  $J$  = 4.8Hz, 4H);  $^{13}C$  NMR(100MHz,  $CDCl_3$ ):  $\delta$  = 168.2, 166.2, 166.1, 154.6, 138.0, 131.2, 129.7, 101.1, 86.7, 62.5, 56.6, 53.2, 52.4, 51.2, 47.2; IR(KBr,  $cm^{-1}$ ): 3057, 2950(w, =C-H), 2841(w, C-H), 1743, 1721, 1697(s, C=O), 1585(s), 1438, 1392(m, Ar), 1370(w, CH<sub>3</sub>), 1271, 1215, 1160(m, C-O), 1117, 1104, 1027(m, C-N), 847, 799(s, Ar); MS  $m/z$ (%): 502(3.6) ( $M^+$ ), 471(7.6), 416(31.1), 330(17.4), 318(16), 275(26.5), 242(12.1), 241(100), 231(34), 209(12), 181(17), 168(6), 140(7), 82(6), 56(5), 44(43). **HRMS** (ESI) calcd for  $C_{19}H_{24}IN_2O_6$   $[M+H]^+$  503.0679, found 503.0671.

**1-[2-(2-Iodobenzoyloxy)eth-1-yl]-4-[(E)-1,2-(dimethoxycarbonyl)ethen-1-yl]piperazine 25a**

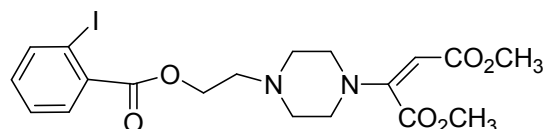

Yield: 65%; light brown sticky clumps,  $^1H$  NMR(400MHz,  $CDCl_3$ ):  $\delta$  = 8.002-7.982(dt,  $J$  = 1.6Hz,  $J$  = 8Hz, 1H), 7.779-7.755(m, 1H), 7.436-7.396(dt,  $J$  = 0.8Hz,  $J$  = 7.6Hz, 1H), 7.192-7.150(dt,  $J$  = 1.6Hz,  $J$  = 7.6Hz, 1H), 4.773(s, 1H), 4.481-4.453(t,  $J$  = 5.6Hz, 2H), 3.920(s, 3H), 3.638(s, 3H), 3.198-3.173(t,  $J$  = 4.8Hz, 4H), 2.811-2.783(t,  $J$  = 5.6Hz, 2H), 2.633-2.608(t,  $J$  =

4.8Hz, 4H);  $^{13}\text{C}$  NMR(100MHz,  $\text{CDCl}_3$ ):  $\delta = 168.1, 166.5, 166.2, 154.6, 141.4, 135.2, 132.9, 131.0, 128.1, 94.2, 86.5, 62.5, 56.4, 53.1, 52.3, 51.1, 47.2$ ; IR(KBr,  $\text{cm}^{-1}$ ): 3056(w, =C-H), 2950, 2844(w, C-H), 1742, 1695(s, C=O), 1582(s), 1438, 1400, 1371(m, Ar), 1277, 1208, 1160(m, C-O), 1079, 1142, 1022(m, C-N), 794, 732(s, Ar); MS  $m/z(\%)$ : 502(5)( $\text{M}^+$ ), 471(9), 442(3) 416(41), 330(30), 318(29), 275(23), 254(8), 241(100), 231(49), 209(14), 195(12), 181(19), 168(8), 140(10), 126(4), 105(17), 82(7), 56(8), 44(24); **HRMS** (ESI) calcd for  $\text{C}_{19}\text{H}_{24}\text{IN}_2\text{O}_6$   $[\text{M}+\text{H}]^+$  503.0679, found 503.0672.

**1-[2-(2-Hydroxybenzoyloxy)eth-1-yl]-4-[(E)-1,2-(dimethoxycarbonyl)ethen-1-yl]piperazine 26a**

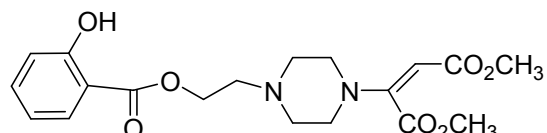

Yield: 31%; light yellow sticky clumps,  $^1\text{H}$  NMR (400MHz,  $\text{CDCl}_3$ ):  $\delta = 10.682(\text{s}, 1\text{H}), 7.820-7.796(\text{m}, J = 1.6\text{Hz}, J = 8.0\text{Hz}, 1\text{H}), 7.485-7.442(\text{m}, J = 1.6\text{Hz}, J = 8.8\text{Hz}, 1\text{H}), 6.987-6.966(\text{d}, J = 8.4\text{Hz}, 1\text{H}), 6.910-6.872(\text{t}, J = 8.0\text{Hz}, 1\text{H}), 4.777(\text{s}, 1\text{H}), 4.482-4.454(\text{t}, J = 5.6\text{Hz}, 2\text{H}), 3.917(\text{s}, 3\text{H}), 3.635(\text{s}, 3\text{H}), 3.191-3.166(\text{t}, J = 4.8\text{Hz}, 4\text{H}), 2.814-2.785(\text{t}, J = 6.4\text{Hz}, 2\text{H}), 2.631-2.606(\text{t}, J = 4.8\text{Hz}, 4\text{H})$ ;  $^{13}\text{C}$  NMR (100MHz,  $\text{CDCl}_3$ ):  $\delta = 169.8, 168.0, 166.1, 161.6, 154.5, 135.9, 129.9, 119.3, 117.7, 112.4, 86.5, 62.4, 56.3, 53.0, 52.3, 50.9, 47.1$ ; IR (KBr,  $\text{cm}^{-1}$ ): 3051(w, =C-H), 2953(w, C-H), 1739(s, C=O), 1649(s), 1436(m, Ar), 1329(w,  $\text{CH}_3$ ), 1259(m, C-O), 1171, 1099(m, C-N), 860, 782 (s, Ar); MS  $m/z(\%)$ : 392(15)( $\text{M}^+$ ), 361(11), 306(24), 242(13), 241(100), 220(21), 209(22), 181(24), 165(14), 121(18), 100(11), 44(14); **HRMS** (ESI) calcd for  $\text{C}_{19}\text{H}_{25}\text{N}_2\text{O}_7$   $[\text{M}+\text{H}]^+$  393.1662, found 393.1665.

**1-[2-(4-Bromobenzoyloxy)eth-1-yl]-4-[(E)-(2-methoxycarbonyl)ethen-1-yl]piperazine 27a**

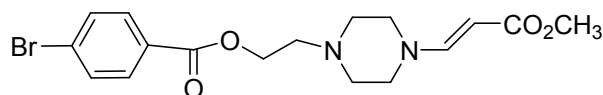

Yield: 45%; white flake, mp: 152-154°C,  $^1\text{H}$  NMR(400MHz,  $\text{CDCl}_3$ ):  $\delta = 7.882-7.860(\text{dd}, J = 2\text{Hz}, J = 5.8\text{Hz}, 2\text{H}), 7.593-7.521(\text{dt}, J = 7.2\text{Hz}, J = 9.2\text{Hz}, 2\text{H}), 7.385-7.352(\text{d}, J = 13.2\text{Hz}, 1\text{H}), 4.678-4.646(\text{d}, J = 12.8\text{Hz}, 1\text{H}), 4.478-4.449(\text{m}, J = 5.6\text{Hz}, 2\text{H}), 3.661(\text{s}, 3\text{H}), 3.261-3.236(\text{m}, J = 4.8\text{Hz}, 4\text{H}), 2.838-2.810(\text{m}, J = 5.6\text{Hz}, 2\text{H}), 2.627-2.602(\text{m}, J = 4.8\text{Hz}, 4\text{H})$ ;  $^{13}\text{C}$  NMR (100MHz,  $\text{CDCl}_3$ ):  $\delta = 170.3, 165.9, 151.8, 131.9, 131.2, 129.1, 128.4, 85.3, 62.3, 56.7, 53.2, 52.6, 50.8$ ; IR(KBr,  $\text{cm}^{-1}$ ): 3055(w, =C-H), 2851(w, C-H), 1721 (s, C=O), 1612, 1591(s), 1447, 1427, 1421(m, Ar), 1397(w,  $\text{CH}_3$ ), 1269, 1258, 1159(m, C-O), 1104 (m, C-N), 849, 736(s, Ar); MS  $m/z(\%)$ : 396(1)( $\text{M}^+$ ), 365(1), 343(1), 312(1), 292(3), 279(5), 264(5), 227(9), 220(21), 202(96), 200(100), 183(96), 178(3), 157(39), 127(27), 112(18), 99(55), 76(23), 75(29), 74(18), 50(27), 44(45). **HRMS** (ESI) calcd for  $\text{C}_{17}\text{H}_{22}\text{BrN}_2\text{O}_4$   $[\text{M}+\text{H}]^+$  397.0763, found 397.0762.

**1-[2-(4-Bromobenzoyloxy)eth-1-yl]-4-[(E)-(2-ethoxycarbonyl)ethen-1-yl]piperazine 28a**

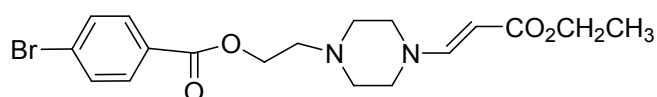

Yield: 39%; light yellow sticky clumps,  $^1\text{H}$  NMR(400MHz,  $\text{CDCl}_3$ ):  $\delta = 7.893-7.872(\text{d}, J =$

8.4Hz, 2H), 7.599-7.578(d,  $J = 8.4\text{Hz}$ , 2H), 7.374-7.341(d,  $J = 13.2\text{Hz}$ , 1H), 4.673-4.640(d,  $J = 13.2\text{Hz}$ , 1H), 4.463-4.435(t,  $J = 5.6\text{Hz}$ , 2H), 4.155-4.102(q,  $J = 7.2\text{Hz}$ , 2H), 3.243-3.218(t,  $J = 4.8\text{Hz}$ , 4H), 2.813-2.784(t,  $J = 5.6\text{Hz}$ , 2H), 2.596-2.571(t,  $J = 4.8\text{Hz}$ , 4H), 1.269-1.233(t,  $J = 7.2\text{Hz}$ , 3H);  $^{13}\text{C}$  NMR (100MHz,  $\text{CDCl}_3$ ):  $\delta = 169.9, 165.9, 151.7, 132.0, 131.3, 129.2, 128.4, 85.6, 62.5, 59.2, 56.8, 52.7, 14.8$ ; IR(KBr,  $\text{cm}^{-1}$ ): 3402(w, =C-H), 2926, 2856(w, C-H), 1721(s, C=O), 1683(s), 1512, 1449(m, Ar), 1369(w,  $\text{CH}_3$ ), 1269, 1219, 1184(m, C-O), 1112, 1070(m, C-N), 851, 757(s, Ar); MS  $m/z(\%)$ : 410(6)( $\text{M}^+$ ), 383(5), 365(8), 312(11), 284(13), 270(7), 227(27), 197(81), 183(26), 151(23), 141(25), 124(14), 110(14), 82(32), 56(18), 44(100). **HRMS** (ESI) calcd for  $\text{C}_{18}\text{H}_{24}\text{BrN}_2\text{O}_4$  [ $\text{M}+\text{H}$ ] $^+$  411.0919, found 411.0911.

**Ethyl (*E*)-3-(4-bromobenzencarbonyloxy)-propenoate 28b**

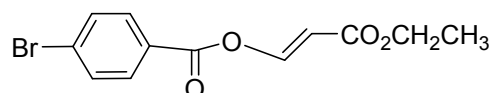

Yield: 25%; white flake, mp: 61-62°C,  $^1\text{H}$  NMR(400MHz,  $\text{CDCl}_3$ ):  $\delta = 8.552-8.491$ (d,  $J = 12.4\text{Hz}$ , 1H), 7.989-7.968(d,  $J = 8.4\text{Hz}$ , 2H), 7.663-7.642(d,  $J = 8.4\text{Hz}$ , 2H), 5.922-5.890(d,  $J = 12.4\text{Hz}$ , 1H), 4.275-4.222(m,  $J = 6.8\text{Hz}$ , 2H), 1.340-1.305(t,  $J = 6.8\text{Hz}$ , 3H);  $^{13}\text{C}$  NMR(100MHz,  $\text{CDCl}_3$ ):  $\delta = 166.2, 162.2, 149.8, 132.4, 131.9, 130.0, 126.9, 107.1, 60.8, 14.5$ ; IR(KBr,  $\text{cm}^{-1}$ ): 3091(w, =C-H), 2977(w, C-H), 1745, 1717(s, C=O), 1658(s), 1485(m, Ar), 1367(w,  $\text{CH}_3$ ), 1313(m), 1259 (m, C-O), 1106, 1070(m, C-N), 849, 748(s, Ar); MS  $m/z(\%)$ : 298(5)( $\text{M}^+$ ), 293(1), 279(1), 253(1), 239(1), 186(7), 183(100), 155(19), 149(3), 139(2), 119(3), 76(12), 50(6). **HRMS** (ESI) calcd for  $\text{C}_{12}\text{H}_{12}\text{BrO}_4$  [ $\text{M}+\text{H}$ ] $^+$  298.9919, found 298.9911.

**1-[(*E*)-1,2-(Dimethoxycarbonyl)ethen-1-yl]-4-[2-(nicotinoyloxy)eth-1-yl]piperazine 29a**

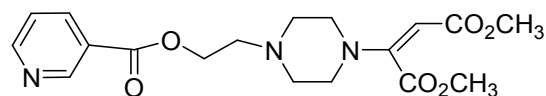

Yield: 68%; light brown sticky clumps,  $^1\text{H}$  NMR(400MHz,  $\text{CDCl}_3$ ):  $\delta = 9.213-9.210$ (d,  $J = 1.2\text{Hz}$ , 1H), 8.804-8.788(dd,  $J = 4.8\text{Hz}, J = 1.6\text{Hz}$ , 1H), 8.312-8.283(dt,  $J = 1.8\text{Hz}, J = 8.0\text{Hz}$ , 1H), 7.450-7.373(m,  $J = 4.8\text{Hz}, J = 8.0\text{Hz}$ , 1H), 4.784(s, 1H), 4.510-4.482(t,  $J = 5.6\text{Hz}$ , 2H), 3.924(s, 3H), 3.636(s, 3H), 3.200-3.176(t,  $J = 4.8\text{Hz}$ , 4H), 2.834-2.806(t,  $J = 5.6\text{Hz}$ , 2H), 2.650-2.625(t,  $J = 5.2\text{Hz}$ , 4H);  $^{13}\text{C}$  NMR(100MHz,  $\text{CDCl}_3$ ):  $\delta = 167.9, 165.9, 165.1, 154.4, 153.5, 150.7, 137.0, 125.9, 123.4, 86.3, 62.4, 56.3, 52.9, 52.2, 50.8, 47.1$ ; IR(KBr,  $\text{cm}^{-1}$ ): 3289(w, =C-H), 2996, 2953(w, C-H), 17421, 1711(s, C=O), 1583(s), 1437(m, Ar), 1366(w,  $\text{CH}_3$ ), 1277(m, C-O), 1161, 1110(m, C-N), 859, 780(s, Ar); MS  $m/z(\%)$ : 377(9) ( $\text{M}^+$ ), 349(8), 346(17), 318(17), 292(6), 291(31), 286(6), 254(7), 242(12), 241(100), 220(6), 209(18), 205(26), 193(15), 181(25), 151(7), 150(58), 140(11), 106(23), 78(12), 44(17); **HRMS** (ESI) calcd for  $\text{C}_{18}\text{H}_{24}\text{N}_3\text{O}_6$  [ $\text{M}+\text{H}$ ] $^+$  378.1665, found 378.1672.

**1-[2-(5-Bromonicotinoyloxy)eth-1-yl]-4-[(*E*)-1,2-(dimethoxycarbonyl)ethen-1-yl]piperazine 30a**

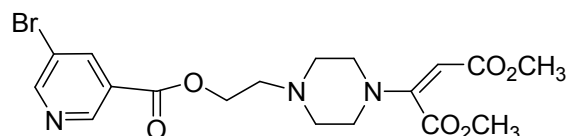

Yield: 89%; yellow flake, mp: 86-87°C,  $^1\text{H}$  NMR(400MHz,  $\text{CDCl}_3$ ):  $\delta = 9.110-9.100$ (t,  $J = 2\text{Hz}$ , 1H), 8.859-8.844(m, 1H), 8.417-8.408(t,  $J = 2\text{Hz}$ , 1H), 4.781(s, 1H), 4.497-4.484(t,  $J =$

5.6Hz, 2H), 3.927(s, 3H), 3.641(s, 3H), 3.182-3.172(t,  $J = 4.8\text{Hz}$ , 4H), 2.809-2.796(t,  $J = 5.6\text{Hz}$ , 2H), 2.623-2.614(t,  $J = 5.2\text{Hz}$ , 4H);  $^{13}\text{C}$  NMR(100MHz,  $\text{CDCl}_3$ ):  $\delta = 168.0, 166.1, 163.9, 154.7, 154.5, 148.9, 139.6, 127.3, 120.7, 86.6, 62.7, 56.4, 53.1, 52.3, 51.0, 47.1$ ; IR(KBr,  $\text{cm}^{-1}$ ): 3058 (w, =C-H), 2923, 2852(w, C-H), 1741, 1693, 1657(s, C=O), 1584(s), 1437, 1419(m, Ar), 1370(w,  $\text{CH}_3$ ), 1306, 1268, 1213, 1159(m, C-O), 1112, 1043, 1022(m, C-N), 975, 756(s, Ar); MS  $m/z(\%)$ : 455(6)( $\text{M}^+$ ), 457(6)( $\text{M}+2$ ), 426(8), 396(8), 369(19), 285(17), 254(7), 242(11), 241(100), 228(39), 209(18), 195(12), 185(24), 158(8), 140(15), 82(9), 56(8), 44(18); **HRMS** (ESI) calcd for  $\text{C}_{18}\text{H}_{23}\text{BrN}_3\text{O}_6$  [ $\text{M}+\text{H}$ ] $^+$  456.0770, found 456.0778.

**1-[(E)-1,2-(Dimethoxycarbonyl)ethen-1-yl]-4-[2-(quinoline-2-carboxyloxyloxy)eth-1-yl]piperazine 31a**

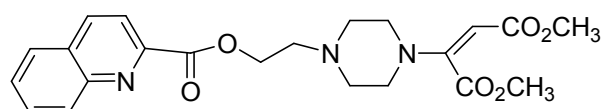

Yield: 71%; brown sticky clumps,  $^1\text{H}$  NMR(400MHz,  $\text{CDCl}_3$ ):  $\delta = 8.341-8.288(\text{m}, 2\text{H}), 8.185-8.164(\text{d}, J = 8.4\text{Hz}, 1\text{H}), 7.906-7.885(\text{d}, J = 8.4\text{Hz}, 1\text{H}), 7.826-7.784(\text{dt}, J = 1.6\text{Hz}, J = 6.8\text{Hz}, 1\text{H}), 7.684-7.644(\text{m}, 1\text{H}), 4.784(\text{s}, 1\text{H}), 4.628-4.599(\text{t}, J = 5.6\text{Hz}, 2\text{H}), 3.922(\text{s}, 3\text{H}), 3.639(\text{s}, 3\text{H}), 3.226-3.201(\text{t}, J = 4.8\text{Hz}, 4\text{H}), 2.898-2.869(\text{t}, J = 5.6\text{Hz}, 2\text{H}), 2.681-2.656(\text{t}, J = 4.8\text{Hz}, 4\text{H})$ ;  $^{13}\text{C}$  NMR(100MHz,  $\text{CDCl}_3$ ):  $\delta = 168.0, 166.1, 165.2, 154.5, 147.7, 147.4, 137.5, 130.5, 130.4, 129.3, 128.8, 127.6, 121.0, 86.4, 62.6, 56.3, 53.0, 52.2, 51.0, 47.0$ ; IR(KBr,  $\text{cm}^{-1}$ ): 3063(w, =C-H), 2951, 2917, 2844(w, C-H), 1741, 1697(s, C=O), 1584(s), 1531, 1498, 1439(m, Ar), 1372(w,  $\text{CH}_3$ ), 1341(m), 1276, 1240, 1160(m, C-O), 1110, 1043, 1019(m, C-N), 869, 773(s, Ar); MS  $m/z(\%)$ : 427(83)( $\text{M}^+$ ), 396(8)( $\text{M}+2$ ), 348(9), 255(9), 241(76), 229(71), 226(26), 209(15), 195(23), 181(22), 174(9), 140(12), 129(18), 128(33), 121(10), 82(14), 70(6), 55(6), 44(100). **HRMS** (ESI) calcd for  $\text{C}_{22}\text{H}_{26}\text{N}_3\text{O}_6$  [ $\text{M}+\text{H}$ ] $^+$  428.1822, found 428.1829.

**1-[(E)-1,2-(Dimethoxycarbonyl)ethen-1-yl]-4-[2-(pyrazine-2-carboxyloxyloxy)eth-1-yl]piperazine 32a**

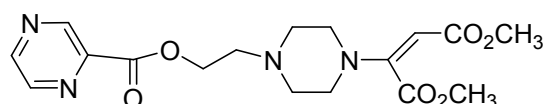

Yield: 66%; white flake, mp: 71-72°C,  $^1\text{H}$  NMR(400MHz,  $\text{CDCl}_3$ ):  $\delta = 9.319(\text{s}, 1\text{H}), 8.832-8.826(\text{d}, J = 2.4\text{Hz}, 1\text{H}), 8.774-8.768(\text{m}, 1\text{H}), 4.784(\text{s}, 1\text{H}), 4.609-4.581(\text{t}, J = 5.6\text{Hz}, 2\text{H}), 3.924(\text{s}, 3\text{H}), 3.634(\text{s}, 3\text{H}), 3.211-3.187(\text{t}, J = 4.8\text{Hz}, 4\text{H}), 2.880-2.851(\text{t}, J = 5.6\text{Hz}, 2\text{H}), 2.671-2.647(\text{t}, J = 4.8\text{Hz}, 4\text{H})$ ;  $^{13}\text{C}$  NMR(100MHz,  $\text{CDCl}_3$ ):  $\delta = 167.8, 165.8, 163.6, 154.3, 147.7, 146.1, 144.3, 143.0, 86.1, 62.7, 56.1, 52.8, 52.0, 50.7, 46.8$ ; IR(KBr,  $\text{cm}^{-1}$ ): 3058 (w, =C-H), 2951, 2847(w, C-H), 1742, 1695(s, C=O), 1583(s), 1442 (m, Ar), 1371(w,  $\text{CH}_3$ ), 1303(m), 1210, 1258, 1160(m, C-O), 1046, 1020(m, C-N), 868, 732(s, Ar); MS  $m/z(\%)$ : 378(80)( $\text{M}^+$ ), 347(25), 346(15), 319(18), 287(8), 254(20), 241(100), 225(9), 221(13), 209(23), 206(60), 195(30), 181(36), 168(9), 152(15), 151(72), 140(19), 126(16), 107(14), 82(19), 79(25), 70(10), 56(15), 44(49). **HRMS** (ESI) calcd for  $\text{C}_{17}\text{H}_{23}\text{N}_4\text{O}_6$  [ $\text{M}+\text{H}$ ] $^+$  379.1618, found 379.1611.

**1-[(E)-1,2-(Dimethoxycarbonyl)ethen-1-yl]-4-[2-(2-(1H-tetrazol-1-yl)acetoyloxyloxy)eth-1-yl]piperazine 33a**

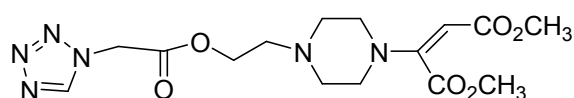

Yield: 55%; light yellow sticky clumps,  $^1\text{H NMR}$ (400MHz,  $\text{CDCl}_3$ ):  $\delta$  = 8.964(s, 1H), 5.376(s, 2H), 4.768(s, 1H), 4.359-4.332(t,  $J$  = 5.6Hz, 2H), 3.903(s, 3H), 3.627(s, 3H), 3.166-3.141(t,  $J$  = 4.8Hz, 4H), 2.694-2.666(t,  $J$  = 5.6Hz, 2H), 2.547-2.522(t,  $J$  = 4.8Hz, 4H);  $^{13}\text{C NMR}$ (100MHz,  $\text{CDCl}_3$ ):  $\delta$  = 168.1, 166.1, 165.4, 154.4, 144.0, 86.4, 63.2, 56.0, 53.1, 52.1, 51.0, 48.7, 46.9; IR(KBr,  $\text{cm}^{-1}$ ): 3137(w, =C-H), 2997, 2953, 2847(w, C-H), 1743, 1690(s, C=O), 1584(s), 1439(m, Ar), 1373(w,  $\text{CH}_3$ ), 1278, 1216(m, C-O), 1161, 1102, 1043(m, C-N), 798, 732(s, Ar); MS  $m/z$ (%): 382(4)( $\text{M}^+$ ), 384(1)( $\text{M}+2$ ), 351(25), 323(17), 322(24), 320(8), 296(13), 242(11), 241(100), 239(13), 210(64), 209(26), 185(22), 181(34), 168(12), 140(36), 127(39), 126(12), 97(6), 84(9), 82(19), 70(12), 55(20), 44(61). **HRMS** (ESI) calcd for  $\text{C}_{15}\text{H}_{23}\text{N}_6\text{O}_6$  [ $\text{M}+\text{H}$ ] $^+$  383.1679, found 383.1670.

**1-[(E)-1,2-(Dimethoxycarbonyl)ethen-1-yl]-4-[2-(furan-2-carboxyloxy)eth-1-yl]piperazine 34a**

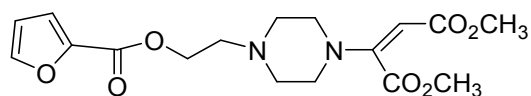

Yield: 79%; light yellow sticky clumps,  $^1\text{H NMR}$ (400MHz,  $\text{CDCl}_3$ ):  $\delta$  = 7.622(d, 1H), 7.197-7.188(d,  $J$  = 3.6Hz, 1H), 6.544-6.535(t,  $J$  = 3.6Hz, 1H), 4.780(s, 1H), 4.444-4.418(t,  $J$  = 5.2Hz, 2H), 3.916(s, 3H), 3.630(s, 3H), 3.183-3.172(t,  $J$  = 4.8Hz, 4H), 2.787-2.761(t,  $J$  = 5.2Hz, 2H), 2.619-2.609(t,  $J$  = 4.8Hz, 4H);  $^{13}\text{C NMR}$ (100MHz,  $\text{CDCl}_3$ ):  $\delta$  = 167.8, 165.8, 158.2, 154.3, 146.4, 144.2, 118.0, 111.8, 86.0, 61.8, 56.2, 52.8, 52.1, 50.7, 46.9; IR(KBr,  $\text{cm}^{-1}$ ): 3141(w, C-H), 3057(w, =C-H), 2951, 2908, 2842(w, C-H), 1740, 1697(s, C=O), 1582(s), 1475, 1438, 1396(m, Ar), 1371(w,  $\text{CH}_3$ ), 1297(b, s, C-O), 1215, 1163, 1120(m), 1078, 1043, 1017(m, C-N), 916, 733(s, Ar); MS  $m/z$ (%): 366(8) ( $\text{M}^+$ ), 335(16), 307(5), 278(27), 254(8), 242(11), 241(100), 226(4), 209 (18), 194(21), 181(28), 168(8), 140(12), 139(54), 82(8), 56(8), 44(31); **HRMS** (ESI) calcd for  $\text{C}_{17}\text{H}_{23}\text{N}_2\text{O}_7$  [ $\text{M}+\text{H}$ ] $^+$  367.1505, found 367.1509.

**1-[(E)-1,2-(Dimethoxycarbonyl)ethen-1-yl]-4-[2-(picolinoyloxy)eth-1-yl]piperazine 35a**

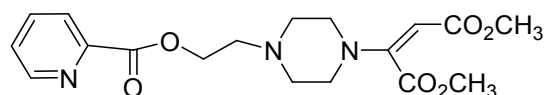

Yield: 77%; light brown sticky clumps,  $^1\text{H NMR}$ (400MHz,  $\text{CDCl}_3$ ):  $\delta$  = 8.779-8.765(dd,  $J$  = 0.8Hz,  $J$  = 4.8Hz, 1H), 8.144-8.124(d,  $J$  = 8Hz, 1H), 7.900-7.857(dt,  $J$  = 1.6Hz,  $J$  = 3.6Hz, 1H), 7.533-7.499(m, 1H), 4.772(s, 1H), 4.566-4.537(t,  $J$  = 5.6Hz, 2H), 3.920(s, 3H), 3.638(s, 3H), 3.196-3.171(t,  $J$  = 4.8Hz, 4H), 2.858-3.829(t,  $J$  = 5.6Hz, 2H), 2.651-2.626(t,  $J$  = 4.8Hz, 4H);  $^{13}\text{C NMR}$ (100MHz,  $\text{CDCl}_3$ ):  $\delta$  = 168.1, 166.2, 165.2, 154.6, 150.0, 147.9, 137.3, 127.2, 125.3, 86.5, 62.6, 56.4, 53.1, 52.3, 51.1, 47.1; IR(KBr,  $\text{cm}^{-1}$ ): 3057(w, =C-H), 2951, 2844(w, C-H), 1742, 1722, 1697(s, C=O), 1585(s, C=N), 1438(m, Ar), 1370(w,  $\text{CH}_3$ ), 1273, 1246(m, C-O), 1160, 1117 (m, C-N), 895, 753(s, Ar); MS  $m/z$ (%): 377(53) ( $\text{M}^+$ ), 346(34), 328(21), 318(80), 300(56), 286(10), 271(5), 242(8), 241(77), 226(30), 205(57), 195(61), 179(93), 150(100), 149(54), 140(38), 124(20), 106(22), 82(28), 78(46), 69(46), 56(23). **HRMS** (ESI) calcd for  $\text{C}_{18}\text{H}_{24}\text{N}_3\text{O}_6$  [ $\text{M}+\text{H}$ ] $^+$  378.1665, found 378.1669.

**1-[2-(1-(4-Chlorophenyl)-5-methyl-1H-1,2,3-triazole-4-carboxyloxy)eth-1-yl]-4-[(E)-1,2-(dimethoxycarbonyl)ethen-1-yl]piperazine 36a**



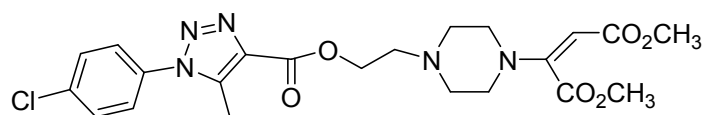

Yield: 68%; white needle, mp: 161-163°C,  $^1\text{H NMR}$ (400MHz,  $\text{CDCl}_3$ ):  $\delta$  = 7.583-7.561(d,  $J$  = 8.8Hz, 2H), 7.438-7.416(d,  $J$  = 8.8Hz, 2H), 4.770(s, 1H), 4.545-4.516(t,  $J$  = 5.6Hz, 2H), 3.917(s, 3H), 3.637(s, 3H), 3.201-3.177(t,  $J$  = 4.8Hz, 4H), 2.876-2.849(t,  $J$  = 5.6Hz, 2H), 2.678(t,  $J$  = 4.8Hz, 4H), 2.598(s, 3H);  $^{13}\text{C NMR}$ (100MHz,  $\text{CDCl}_3$ ):  $\delta$  = 168.2, 166.2, 161.6, 154.6, 139.3, 136.7, 136.5, 134.0, 130.2, 126.7, 86.7, 62.0, 56.5, 53.2, 52.4, 51.1, 47.2, 10.2; IR(KBr,  $\text{cm}^{-1}$ ): 3093, 2951(w, =C-H), 2848(w, C-H), 1726(s, C=O), 1575(s), 1442, 1413, 1410(m, Ar), 1373(w,  $\text{CH}_3$ ), 1273, 1253, 1223, 1159(m, C-O), 1106(m, C-N), 858, 786(s, Ar); MS  $m/z$ (%): 491(3)( $\text{M}^+$ ), 460(5), 432(43), 400(7), 321(9), 319(28), 293(17), 266(11), 264(32), 241(74), 194(23), 192(69), 191(28), 166(18), 164(60), 152(53), 128(21), 111(36), 101(17), 75(20), 69(15), 44(100). **HRMS** (ESI) calcd for  $\text{C}_{22}\text{H}_{27}\text{ClN}_5\text{O}_6$  [ $\text{M}+\text{H}$ ] $^+$  492.1650, found 492.1658.

**1-(1-(4-Chlorophenyl)-5-methyl-1H-1,2,3-triazole-4-carboxyloxy)-(E)-1,2-di(methoxycarbonyl)ethene 36b**

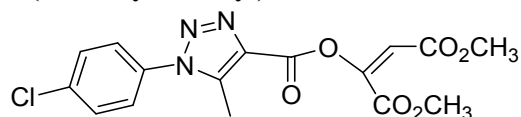

Yield: 38%; white flake, mp: 90-91°C,  $^1\text{H NMR}$ (400MHz,  $\text{CDCl}_3$ ):  $\delta$  = 7.596-7.575(d,  $J$  = 8.4Hz, 2H), 7.460-7.439(d,  $J$  = 8.4Hz, 2H), 6.850(s, 1H), 3.886(s, 3H), 3.754(s, 3H), 2.635(s, 3H);  $^{13}\text{C NMR}$ (100MHz,  $\text{CDCl}_3$ ):  $\delta$  = 163.2, 161.6, 158.3, 146.3, 140.7, 136.6, 135.3, 133.9, 130.2, 126.8, 117.9, 53.5, 52.4, 10.3; IR(KBr,  $\text{cm}^{-1}$ ): 3098, 3070(w, =C-H), 2955, 2928(w, C-H), 1736(s, C=O), 1589(s), 1502, 1436(m, Ar), 1342(w,  $\text{CH}_3$ ), 1279(m), 1201, 1179(m, C-O), 1104, 1063(m, C-N), 836, 737(s, Ar); MS  $m/z$ (%): 379(4)( $\text{M}^+$ ), 348(3), 322(7), 320(20), 292(2), 264(2), 236(3), 222(22), 220(67), 194(23), 192(69), 191(28), 166(18), 164(60), 152(53), 128(21), 111(36), 101(17), 75(20), 69(15), 44(100). **HRMS** (ESI) calcd for  $\text{C}_{16}\text{H}_{15}\text{ClN}_3\text{O}_6$  [ $\text{M}+\text{H}$ ] $^+$  380.0649, found 380.0649.

**1-[(E)-1,2-(Dimethoxycarbonyl)ethen-1-yl]-4-[2-(5-methyl-1-phenyl-1H-1,2,3-triazole-4-carboxyloxy)eth-1-yl]piperazine 37a**

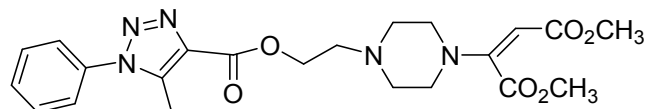

Yield: 71%; white flake, mp: 90-91°C,  $^1\text{H NMR}$ (400MHz,  $\text{CDCl}_3$ ):  $\delta$  = 7.612-7.569(m, 3H), 7.477-7.453(m, 2H), 4.773(s, 1H), 4.546-4.517(t,  $J$  = 5.6Hz, 2H), 3.924(s, 3H), 3.639(s, 3H), 3.200-3.176(t,  $J$  = 4.8Hz, 4H), 2.861-2.832(t,  $J$  = 5.6Hz, 2H), 2.670-2.646(t,  $J$  = 4.8Hz, 4H), 2.603(s, 3H);  $^{13}\text{C NMR}$  (100MHz,  $\text{CDCl}_3$ ):  $\delta$  = 168.2, 166.2, 161.7, 154.6, 139.3, 136.5, 135.5, 130.3, 129.9, 125.5, 86.5, 61.9, 56.5, 53.2, 52.4, 51.1, 47.2, 10.2; IR(KBr,  $\text{cm}^{-1}$ ): 3067(w, =C-H), 2951, 2844(w, C-H), 1741, 1712 (s, C=O), 1581(s), 1437(m, Ar), 1278(w,  $\text{CH}_3$ ), 1242(m, C-O), 1161, 1111(m, C-N), 768(s, Ar); MS  $m/z$ (%): 457 (2)( $\text{M}^+$ ), 398(13), 366(3), 285(6), 259(6), 241(12), 230(9), 195(7), 181(8), 158(9), 130(6), 77(9), 69(10), 45(14), 44(100). **HRMS** (ESI) calcd for  $\text{C}_{22}\text{H}_{28}\text{N}_5\text{O}_6$  [ $\text{M}+\text{H}$ ] $^+$  458.2040, found 458.2045.

**1-[2-(1-(4-Ethoxyphenyl)-5-methyl-1H-1,2,3-triazole-4-carboxyloxy)eth-1-yl]-4-[(E)-1,2-(dimethoxycarbonyl)ethen-1-yl]piperazine 38a**

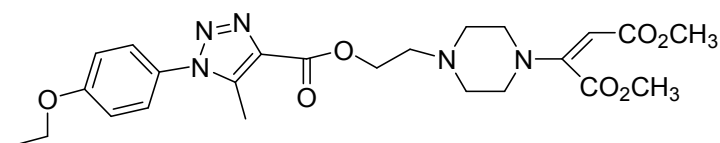

Yield: 64%; white flake, mp: 105-106°C,  $^1\text{H NMR}$ (400MHz,  $\text{CDCl}_3$ ):  $\delta$  = 7.354-7.332(d,  $J$  = 8.8Hz, 2H), 7.054-7.032(d,  $J$  = 8.8Hz, 2H), 4.766(s, 1H), 4.518(m, 2H), 4.135-4.084(q,  $J$  = 6.8Hz, 2H), 3.913(s, 3H), 3.632(s, 3H), 3.186(m, 4H), 2.849(m, 2H), 2.666(m, 4H), 2.551(s, 3H), 1.480-1.446(t,  $J$  = 6.8Hz, 3H);  $^{13}\text{C NMR}$ (100MHz,  $\text{CDCl}_3$ ):  $\delta$  = 168.1, 166.1, 161.7, 160.3, 154.6, 139.4, 136.3, 128.1, 126.8, 115.4, 86.6, 64.1, 61.9, 56.5, 53.1, 52.4, 51.0, 47.2, 14.8, 10.1; IR(KBr,  $\text{cm}^{-1}$ ): 2974(w, =C-H), 2927, 2891(w, C-H), 1731(s, C=O), 1580(s), 1452(m, Ar), 1382(w,  $\text{CH}_3$ ), 1218(m, C-O), 1090(m, C-N), 881, 630(s, Ar); MS  $m/z$ (%): 501(2)( $\text{M}^+$ ), 470(3), 442(18), 398(19), 384(7), 329(8), 303(13), 255(14), 241(100), 211(21), 181(18), 140(11), 99(11), 70(7), 56(13), 44(39). **HRMS** (ESI) calcd for  $\text{C}_{24}\text{H}_{32}\text{N}_5\text{O}_7$  [ $\text{M}+\text{H}$ ] $^+$  502.2302, found 502.2309.

**1-[(E)-1,2-(Dimethoxycarbonyl)ethen-1-yl]-4-[2-(5-methyl-1-(naphthalen-2-yl)-1H-1,2,3-triazole-4-carboxyl)eth-1-yl]piperazine 39a**

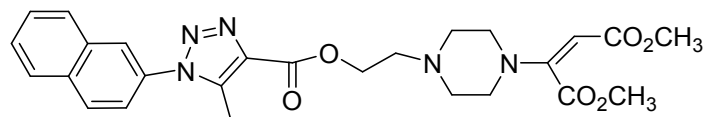

Yield: 82%; white flake, mp: 111-112°C,  $^1\text{H NMR}$ (400MHz,  $\text{CDCl}_3$ ):  $\delta$  = 8.056-8.034(d,  $J$  = 8.8Hz, 1H), 7.974-7.934(m, 3H), 7.654-7.604(m, 2H), 7.551-7.525(dd,  $J$  = 8.8Hz,  $J$  = 2Hz, 1H), 4.776(s, 1H), 4.561-4.533(t,  $J$  = 5.6Hz, 2H), 3.920(s, 3H), 3.636(s, 3H), 3.208-3.183(t,  $J$  = 5.2Hz, 4H), 2.889-2.862(t,  $J$  = 5.2Hz, 2H), 2.686(t,  $J$  = 5.2Hz, 4H), 2.650(s, 3H);  $^{13}\text{C NMR}$ (100MHz,  $\text{CDCl}_3$ ):  $\delta$  = 168.1, 166.2, 161.7, 154.6, 139.5, 136.6, 133.5, 133.1, 132.8, 130.1, 128.5, 128.1, 128.0, 127.8, 124.6, 122.7, 86.7, 61.9, 56.5, 53.1, 52.4, 51.1, 47.2, 10.3; IR(KBr,  $\text{cm}^{-1}$ ): 2974(w, =C-H), 2927, 2890(w, C-H), 1730, 1703(s, C=O), 1581(s), 1452(m, Ar), 1381(w,  $\text{CH}_3$ ), 1275(m, C-O), 1192, 1090(m, C-N), 881(s, Ar); MS  $m/z$ (%): 507(1)( $\text{M}^+$ ), 469(2), 436(7), 377(7), 370(14), 349(11), 324(23), 293(19), 272(16), 241(100), 226(5), 209(7), 185(45), 183(34), 167(4), 112(32), 99(72), 97(13), 70(21), 44(29). **HRMS** (ESI) calcd for  $\text{C}_{26}\text{H}_{30}\text{N}_5\text{O}_6$  [ $\text{M}+\text{H}$ ] $^+$  508.2196, found 508.2190.

**1-[(E)-1,2-(Dimethoxycarbonyl)ethen-1-yl]-4-[2-(1-(4-methoxyphenyl)-5-methyl-1H-1,2,3-triazole-4-carboxyl)eth-1-yl]piperazine 40a**

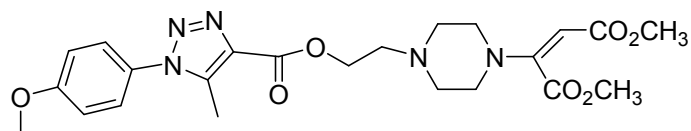

Yield: 60%; white block, mp: 118-119°C,  $^1\text{H NMR}$ (400MHz,  $\text{CDCl}_3$ ):  $\delta$  = 7.378-7.356(d,  $J$  = 8.8Hz, 2H), 7.077-7.055(d,  $J$  = 8.8Hz, 2H), 4.769(s, 1H), 4.534-4.505(t,  $J$  = 5.6Hz, 2H), 3.916(s, 3H), 3.891(s, 3H), 3.632(s, 3H), 3.205-3.180(t,  $J$  = 4.8Hz, 4H), 2.866-2.838(t,  $J$  = 5.6Hz, 2H), 2.680-2.656(t,  $J$  = 4.8Hz, 4H), 2.556(s, 3H);  $^{13}\text{C NMR}$ (100MHz,  $\text{CDCl}_3$ ):  $\delta$  = 168.0, 166.1, 161.6, 160.8, 154.5, 139.3, 136.2, 128.2, 126.8, 114.8, 86.4, 61.7, 56.4, 55.7, 53.0, 52.3, 50.9, 47.0, 10.0; IR(KBr,  $\text{cm}^{-1}$ ): 2975(w, =C-H), 2928, 2892(w, C-H), 1736, 1656(s, C=O), 1452(m, Ar), 1382(w,  $\text{CH}_3$ ), 1308(m, C-O), 1160(m, C-N), 881(s, Ar); MS

m/z(%): 487(3)(M<sup>+</sup>), 443(12), 442(48), 428(51), 398(10), 329(21), 315(30), 303(54), 289(35), 266(16), 260(23), 241(100), 234(21), 211(17), 209(34), 195(45), 188(50), 181(35), 160(25), 146(50), 140(31), 112(26), 99(31), 70(32), 56(26), 44(67). **HRMS** (ESI) calcd for C<sub>23</sub>H<sub>30</sub>N<sub>5</sub>O<sub>7</sub> [M+H]<sup>+</sup> 488.2145, found 488.2141.

**1-[2-(1-(4-Chlorophenyl)-5-methoxy-1H-1,2,3-triazole-4-carboxyloxy)eth-1-yl]-4-[(E)-1,2-(dimethoxycarbonyl)ethen-1-yl]piperazine 41a**

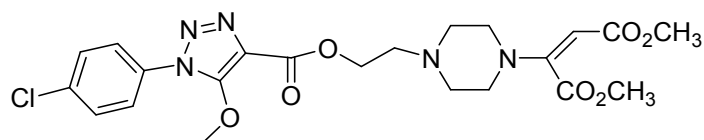

Yield: 63%; white flake, mp: 145-147°C, <sup>1</sup>H NMR(400MHz, CDCl<sub>3</sub>): δ = 7.974-7.952(d, *J* = 8.8Hz, 2H), 7.475-7.453(d, *J* = 8.8Hz, 2H); 4.763(s, 1H), 4.482-4.455(t, *J* = 5.6Hz, 2H), 4.326(s, 3H), 3.913(s, 3H), 3.631(s, 3H), 3.189-3.167(t, *J* = 4.4Hz, 4H), 2.827-2.800(t, *J* = 5.6Hz, 2H), 2.678-2.667(t, *J* = 4.4Hz, 4H); <sup>13</sup>C NMR(100MHz, CDCl<sub>3</sub>): δ = 168.1, 166.1, 159.2, 155.5, 154.6, 134.0, 133.7, 129.5, 122.2, 109.9, 86.3, 62.3, 56.3, 53.1, 52.4, 51.0, 47.1, 42.0; IR(KBr, cm<sup>-1</sup>): 3056 (w, =C-H), 2952, 2845(w, C-H), 1742, 1697(s, C=O), 1582(s), 1422(m, Ar), 1371(w, CH<sub>3</sub>), 1273, 1219, 1161(m, C-O), 1110, 1092(m, C-N), 839, 736(s, Ar); MS m/z(%): 507(2)(M<sup>+</sup>), 476(5), 448(12), 335(7), 309(19), 280(7), 254(11), 241(33), 236(17), 209(11), 195(24), 181(17), 168(10), 140(10), 111(15), 82(23), 70(13), 56(19), 44(100). **HRMS** (ESI) calcd for C<sub>22</sub>H<sub>27</sub>ClN<sub>5</sub>O<sub>7</sub> [M+H]<sup>+</sup> 508.1599, found 508.1592.

**1-[(2-[2-Diazo-3-(E)-(2-bromophenylimino)-butyroyloxy]ethan-1-yl]-4-[(E)-1,2-(dimethoxycarbonyl)ethen-1-yl]piperazine 42a**

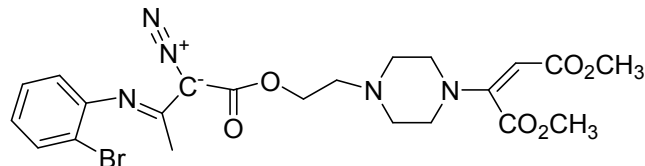

Yield: 35%; white flake, mp: 83-84°C, <sup>1</sup>H NMR(400MHz, CDCl<sub>3</sub>): δ = 7.792-7.769(dd, *J* = 8.0; 5.2Hz, 1H), 7.535-7.408(m, 3H), 4.717(s, 1H), 4.717-4.695(t, *J* = 5.2Hz, 2H), 3.909(s, 3H), 3.641(s, 3H), 3.037-3.012(t, *J* = 5.2Hz, 4H), 2.754(s, 3H), 2.684-2.658(t, *J* = 5.2Hz, 2H), 2.421-2.396(t, *J* = 5.2Hz, 4H); <sup>13</sup>C NMR(100MHz, CDCl<sub>3</sub>): δ = 192.8, 168.1, 166.1, 154.5, 152.5, 133.8, 133.8, 132.3, 130.6, 129.5, 128.6, 121.6, 86.8, 73.6, 57.1, 53.1, 52.2, 51.1, 47.1, 28.3; IR(KBr, cm<sup>-1</sup>): 3065, 2998(w, =C-H), 2843(w, C-H), 2134(s, diazo-), 1741, 1712(s, C=O), 1493, 1438(m, Ar), 1365(w, CH<sub>3</sub>), 1279, 1222, 1162(m, C-O), 1043, 1023(m, C-N), 869, 768(s, Ar); MS m/z(%): 535(1)(M<sup>+</sup>), 403(6), 402(22), 370(4), 331(4), 281(9), 255(37), 254(25), 241(43), 239(7), 209(31), 202(26), 195(81), 181(43), 168(39), 140(27), 135(15), 91(21), 82(56), 70(21), 56(35), 44(100). **HRMS** (ESI) calcd for C<sub>22</sub>H<sub>27</sub>BrN<sub>5</sub>O<sub>6</sub> [M+H]<sup>+</sup> 536.1145, found 536.1149.

**1-[2-(1-(2-Bromophenyl)-5-methyl-1H-1,2,3-triazole-4-carboxyloxy)eth-1-yl]-4-[(E)-1,2-(dimethoxycarbonyl)ethen-1-yl]piperazine 43a**

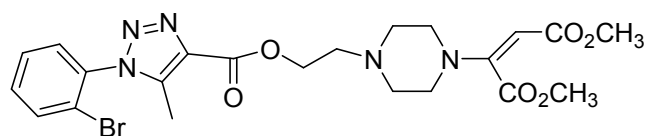

Yield: 49%; white block, mp: 95-96°C, <sup>1</sup>H NMR(400MHz, CDCl<sub>3</sub>): δ = 7.820-7.801(d, *J* = 8.4Hz, 1H), 7.580-7.485(m, 2H), 7.442-7.423(d, *J* = 7.6Hz, 1H), 4.772(s, 1H), 4.543-4.516(t, *J* = 5.6Hz, 2H), 3.914(s, 3H), 3.632(s, 3H), 3.204-3.194(t, *J* = 4.4Hz, 4H), 2.868-2.841(t, *J* = 5.6Hz, 2H), 2.678-2.667(t, *J* = 4.4Hz, 4H), 2.460(s, 3H); <sup>13</sup>C NMR(100MHz, CDCl<sub>3</sub>): δ = 168.0, 166.0, 161.5, 154.5, 140.7, 136.0, 134.6, 133.9, 132.5, 129.3, 128.8, 121.5, 86.5, 61.9, 56.4, 53.0, 52.3, 50.9, 47.1, 9.6; IR(KBr, cm<sup>-1</sup>): 3065, 2998(w, =C-H), 2843(w, C-H), 1741, 1712(s, C=O), 1493, 1438(m, Ar), 1365(w, CH<sub>3</sub>), 1279, 1222, 1162(m, C-O), 1043, 1023(m, C-N), 869, 768(s, Ar); MS m/z(%): 535(2)(M<sup>+</sup>), 476(14), 447(5), 363(6), 337(9), 310(7), 282(6), 262(26), 241(100), 230(9), 209(21), 195(40), 181(37), 168(19), 140(15), 112(3), 82(18), 56(17); HRMS (ESI) calcd for C<sub>22</sub>H<sub>27</sub>BrN<sub>5</sub>O<sub>6</sub> [M+H]<sup>+</sup> 536.1145, found 536.1141.

**1-[2-(1-(3-Chlorophenyl)-5-methyl-1H-1,2,3-triazole-4-carboxyloxy)eth-1-yl]-4-[(E)-1,2-(dimethoxycarbonyl)ethen-1-yl]piperazine 44a**

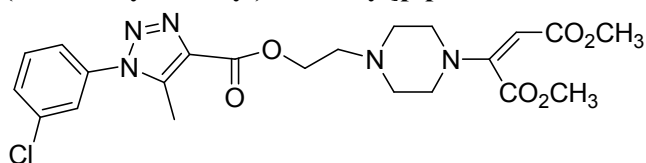

Yield: 67%; white flake, mp: 88-89°C, <sup>1</sup>H NMR(400MHz, CDCl<sub>3</sub>): δ = 7.576-7.513(m, 3H), 7.393-7.366(m, 1H), 4.768(s, 1H), 4.540-4.512(t, *J* = 5.6Hz, 2H), 3.916(s, 3H), 3.635(s, 3H), 3.195-3.132(t, *J* = 4.8Hz, 4H), 2.860-2.831(t, *J* = 5.6Hz, 2H), 2.670-2.645(t, *J* = 4.8Hz, 4H), 2.619(s, 3H); <sup>13</sup>C NMR(100MHz, CDCl<sub>3</sub>): δ = 168.0, 166.0, 161.4, 154.5, 139.2, 136.6, 136.4, 135.5, 130.8, 130.4, 125.6, 123.5, 86.5, 61.9, 56.4, 53.0, 52.3, 50.9, 47.1, 10.1; IR(KBr, cm<sup>-1</sup>): 3062(w, =C-H), 2951(w, C-H), 1742(s, C=O), 1491, 1438(m, Ar), 1371(w, CH<sub>3</sub>), 1272, 1242, 1213, 1162(m, C-O), 1116, 1022(m, C-N), 843, 736(s, Ar); MS m/z(%): 491(3)(M<sup>+</sup>), 460(5), 432(43), 400(7), 321(9), 319(28), 293(17), 266(11), 264(32), 241(74), 209(23), 195(30), 192(34), 181(41), 152(24), 140(22), 111(5), 99(16), 82(22), 70(19), 56(28), 44(100). HRMS (ESI) calcd for C<sub>22</sub>H<sub>27</sub>ClN<sub>5</sub>O<sub>6</sub> [M+H]<sup>+</sup> 492.1650, found 492.1646.

**Typical procedure for the reactions**

To a clear solution of the armoitic acid (1 mmol, 1.00 equiv.) in anhydrous THF (2~8 ml) was added the DABCO (1 mmol, 1.00 equiv.) under stirring at room temperature. After the reaction mixture was stirred for 0.5 hours, the solution was changed from clear to paste. Then, DMAD (2.2mmol, 2.20 equiv.) was dropwise added to paste the mixture and the color of the paste mixture was gradually changed to dark and into solution. The reaction mixture was stirred for 8 hours at room temperature. The solvent was removed under reduced pressure. The given residue was purified by column chromatography using a mixture of petroleum ether and ethyl acetate as eluent to afford product.

**1-[(E)-1,2-(Dimethoxycarbonyl)ethen-1-yl]-4-[2-(2-(phenylamino)benzoyloxy)eth-1-yl]piperazine 45a**

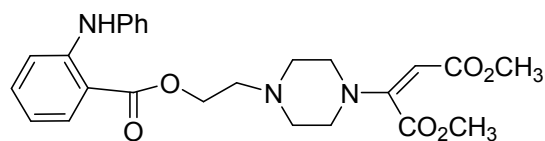

Yield: 89%; light brown sticky clumps, <sup>1</sup>H NMR(400MHz, CDCl<sub>3</sub>): δ = 9.434(s, 1H), 7.932-

7.914(d,  $J = 7.2\text{Hz}$ , 1H), 7.341-7.274(m, 3H), 7.246-7.213(m, 3H), 7.089-7.052(t,  $J = 7.2\text{Hz}$ , 1H), 6.732-6.696(t,  $J = 7.2\text{Hz}$ , 1H), 4.758(s, 1H), 4.414-4.386(t,  $J = 5.6\text{Hz}$ , 2H), 3.901(s, 3H), 3.621(s, 3H), 3.156-3.133(t,  $J = 4.4\text{Hz}$ , 4H), 2.783-2.755(t,  $J = 5.6\text{Hz}$ , 2H), 2.604-2.582(t,  $J = 4.4\text{Hz}$ , 4H);  $^{13}\text{C}$  NMR(100MHz,  $\text{CDCl}_3$ ):  $\delta = 168.0, 167.9, 165.9, 154.4, 147.8, 140.5, 134.2, 131.5, 129.3, 123.6, 122.4, 117.1, 113.9, 111.7, 86.3, 61.7, 56.3, 52.9, 52.1, 50.8, 46.9$ ; IR(KBr,  $\text{cm}^{-1}$ ): 3322(m, -NH), 3088 (w, =C-H), 2950, 2904, 2837(w, C-H), 1744, 1686(s, C=O), 1578(s), 1517, 1453, 1438(m, Ar), 1371(w,  $\text{CH}_3$ ), 1319(m), 1258, 1231, 1161(m, C-O), 1109, 1088(m, C-N), 752, 733(s, Ar); MS  $m/z(\%)$ : 467(27) ( $\text{M}^+$ ), 436(8), 408(31), 330(25), 282(9), 255(18), 241(86), 240(11), 213(33), 196(57), 195(61), 181(16), 167(32), 155(35), 149(16), 139(11), 115(8), 97(12), 91(43), 83(20), 69(20), 44(100). **HRMS** (ESI) calcd for  $\text{C}_{25}\text{H}_{30}\text{N}_3\text{O}_6$  [ $\text{M}+\text{H}$ ] $^+$  468.2135, found 468.2132.

**(±)-1-[(E)-1,2-(Dimethoxycarbonyl)ethen-1-yl]-4-[2-(5-oxopyrrolidine-2-carboxyloxy)eth-1-yl]piperazine 46a**

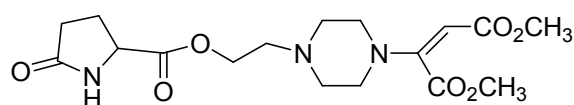

Yield: 68%; light yellow sticky clumps,  $^1\text{H}$  NMR(400MHz,  $\text{CDCl}_3$ ):  $\delta = 7.540(\text{s}, 1\text{H}), 4.780(\text{s}, 1\text{H}), 4.304-4.264(\text{m}, 3\text{H}), 3.915(\text{s}, 3\text{H}), 3.634(\text{s}, 3\text{H}), 3.182-3.159(\text{t}, J = 4.8\text{Hz}, 4\text{H}), 2.693-2.666(\text{t}, J = 5.6\text{Hz}, 2\text{H}), 2.582-2.558(\text{t}, J = 4.8\text{Hz}, 4\text{H}), 2.504-2.421(\text{m}, 1\text{H}), 2.401-2.315(\text{m}, 2\text{H}), 2.249-2.183(\text{m}, 1\text{H})$ ;  $^{13}\text{C}$  NMR(100MHz,  $\text{CDCl}_3$ ):  $\delta = 178.6, 172.1, 168.0, 166.0, 154.4, 86.3, 61.9, 56.2, 55.6, 53.0, 52.1, 50.9, 46.9, 29.3, 24.8$ ; IR(KBr,  $\text{cm}^{-1}$ ): 3095, 3059(w, =C-H), 2953, 2847(w, C-H), 1743, 1696(s, C=O), 1584(s), 1439(b, Ar), 1372(w,  $\text{CH}_3$ ), 1278, 1212, 1160, 1112(m, C-O), 1042, 1019(m, C-N), 868, 734(s, Ar); MS  $m/z(\%)$ : 383(16)( $\text{M}^+$ ), 352(12), 324(18), 292(9), 272(3), 255(5), 242(11), 241(98), 239(7), 209(20), 199(9), 186(14), 181(27), 149(15), 140(17), 100(9), 84(44), 73(11), 56(13), 44(100). **HRMS** (ESI) calcd for  $\text{C}_{17}\text{H}_{26}\text{N}_3\text{O}_7$  [ $\text{M}+\text{H}$ ] $^+$  384.1771, found 384.1768.

**1-[2-(2-(Benzamido)acetoyloxy)eth-1-yl]-4-[(E)-1,2-(dimethoxycarbonyl)ethen-1-yl]piperazine 47a**

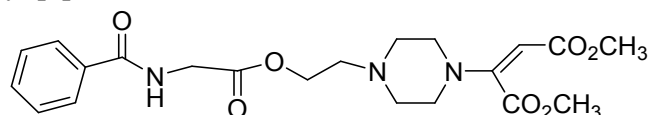

Yield: 90%; light yellow sticky clumps,  $^1\text{H}$  NMR(400MHz,  $\text{CDCl}_3$ ):  $\delta = 7.851-7.832(\text{d}, J = 7.6\text{Hz}, 2\text{H}), 7.524-7.487(\text{t}, J = 7.6\text{Hz}, 1\text{H}), 7.434-7.397(\text{m}, J = 7.6\text{Hz}, 3\text{H}), 4.731(\text{s}, 1\text{H}), 4.271-4.244(\text{t}, J = 5.6\text{Hz}, 2\text{H}), 4.198-4.184(\text{d}, J = 5.6\text{Hz}, 2\text{H}), 3.892(\text{s}, 3\text{H}), 3.616(\text{s}, 3\text{H}), 3.118-3.094(\text{t}, J = 4.8\text{Hz}, 4\text{H}), 2.651-2.624(\text{t}, J = 5.6\text{Hz}, 2\text{H}), 2.523-2.499(\text{t}, J = 4.8\text{Hz}, 4\text{H})$ ;  $^{13}\text{C}$  NMR(100MHz,  $\text{CDCl}_3$ ):  $\delta = 169.8, 168.0, 167.6, 166.0, 154.3, 133.4, 131.8, 128.5, 127.1, 86.1, 62.2, 56.1, 52.9, 52.0, 50.9, 46.8, 41.7$ ; IR(KBr,  $\text{cm}^{-1}$ ): 3359(m, -NH), 3063, 2951, 2843(w, =C-H), 1744, 1695(s, C=O), 1581(s), 1537, 1489, 1439(m, Ar), 1373(w,  $\text{CH}_3$ ), 1278, 1163(m, C-O), 1110, 1081, 1043(m, C-N), 801, 732(s, Ar); MS  $m/z(\%)$ : 433(9)( $\text{M}^+$ ), 402(9), 374(26), 347(22), 268(9), 261(35), 241(100), 235(25), 209(20), 195(15), 181(24), 168(8), 140(11), 105(31), 77(12), 44(29); **HRMS** (ESI) calcd for  $\text{C}_{21}\text{H}_{28}\text{N}_3\text{O}_7$  [ $\text{M}+\text{H}$ ] $^+$  434.1927, found 434.1922.

**1-[2-(2-(1H-Indol-3-yl)acetoyloxy)eth-1-yl]-4-[(E)-1,2-(dimethoxycarbonyl)ethen-1-yl]piperazine 48a**

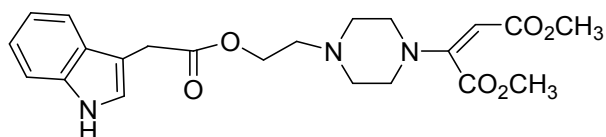

Yield: 61%; light brown sticky clumps,  $^1\text{H NMR}$ (400MHz,  $\text{CDCl}_3$ ):  $\delta$  = 8.604(s, 1H), 7.603-7.583(d,  $J$  = 8Hz, 1H), 7.334-7.314(d,  $J$  = 8Hz, 1H), 7.194-7.156(m, 1H), 7.122-7.063(m, 2H), 4.703(s, 1H), 4.214-4.188(t,  $J$  = 5.2Hz, 2H), 3.898(s, 3H), 3.764(s, 2H), 3.649(s, 3H), 2.959-2.934(t,  $J$  = 4.8Hz, 4H), 2.581-2.554(t,  $J$  = 5.2Hz, 2H), 2.333-2.308(t,  $J$  = 4.8Hz, 4H);  $^{13}\text{C NMR}$ (100MHz,  $\text{CDCl}_3$ ):  $\delta$  = 172.1, 168.3, 166.2, 154.5, 136.2, 128.9, 123.4, 122.1, 119.6, 118.9, 111.5, 108.1, 86.3, 62.0, 56.3, 53.1, 52.0, 51.1, 46.9, 31.6; IR(KBr,  $\text{cm}^{-1}$ ): 3396(m, N-H), 3084(w, =C-H), 2953, 2875, 2849(w, C-H), 1732, 1695(s, C=O), 1582(s), 1457, 1438(m, Ar), 1372(w,  $\text{CH}_3$ ), 1279(m, C-O), 1216, 1162(m, C-N), 911, 733(s, Ar); MS  $m/z$ (%): 429(69) ( $\text{M}^+$ ), 398(6), 370(4), 343(7), 273(11), 255(6), 242(12), 241(100), 239(7), 209(14), 202(10), 181(19), 170(8), 157(31), 149(16), 130(41), 129(10), 103(3), 82(7), 56(6), 44(37). **HRMS** (ESI) calcd for  $\text{C}_{22}\text{H}_{28}\text{N}_3\text{O}_6$  [ $\text{M}+\text{H}$ ] $^+$  430.1978, found 430.1971.

**1-[2-(1H-Indole-2-carboxyloxy)eth-1-yl]-4-[(E)-1,2-(dimethoxycarbonyl)ethen-1-yl]piperazine 49a**

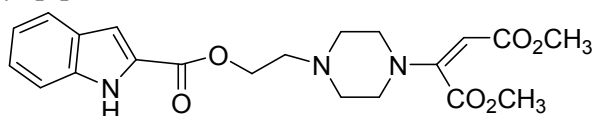

Yield: 77%; light brown sticky clumps,  $^1\text{H NMR}$ (400MHz,  $\text{CDCl}_3$ ):  $\delta$  = 9.877(s, 1H), 7.673-7.653(d,  $J$  = 8.4Hz, 1H), 7.418-7.397(d,  $J$  = 8.4Hz, 1H), 7.318-7.272(m, 1H), 7.174-7.114(m, 2H), 4.763(s, 1H), 4.466-4.439(t,  $J$  = 5.6Hz, 2H), 3.893(s, 3H), 3.630(s, 3H), 3.161-3.136(d,  $J$  = 4.8Hz, 4H), 2.786-2.758(d,  $J$  = 5.6Hz, 2H), 2.607-2.582(d,  $J$  = 4.8Hz, 4H);  $^{13}\text{C NMR}$ (100MHz,  $\text{CDCl}_3$ ):  $\delta$  = 168.1, 166.1, 162.0, 154.5, 137.2, 127.3, 127.0, 125.4, 122.6, 120.8, 112.1, 109.0, 86.4, 61.9, 56.5, 53.1, 52.2, 51.0, 47.0; IR(KBr,  $\text{cm}^{-1}$ ): 3059(w, =C-H), 2951, 2841(w, C-H), 1743, 1702(s, C=O), 1582(s), 1531, 1498, 1438(m, Ar), 1373(w,  $\text{CH}_3$ ), 1341(m), 1307, 1272, 1243(m, C-O), 1194, 1163(m, C-N), 826, 751(s, Ar); MS  $m/z$ (%): 415(16) ( $\text{M}^+$ ), 384(7), 329(26), 286(32), 254(15), 241(100), 231(11), 209(15), 181(20), 144(41), 143(32), 115(11), 89(7), 82(9), 69(5), 56(7), 44(61); **HRMS**(ESI) calcd for  $\text{C}_{21}\text{H}_{26}\text{N}_3\text{O}_6$  [ $\text{M}+\text{H}$ ] $^+$  416.1822, found 416.1818.

**1-[(E)-1,2-(Dimethoxycarbonyl)ethen-1-yl]-4-[2-(4-((E)-1,2-di(methoxycarbonyl)vinylamino)benzoyloxy)eth-1-yl]piperazine 50a**

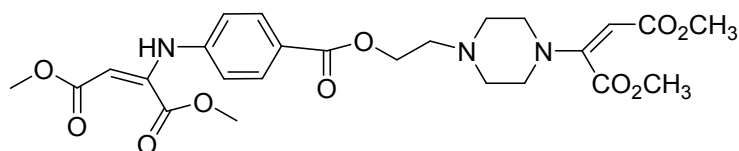

Yield: 69%; light yellow sticky clumps,  $^1\text{H NMR}$ (400MHz,  $\text{CDCl}_3$ ):  $\delta$  = 9.746(s, 1H), 7.950-7.928(d,  $J$  = 8.8Hz, 2H), 6.888-6.866(d,  $J$  = 8.8Hz, 2H), 5.559(s, 1H), 4.780(s, 1H), 4.442-4.414(t,  $J$  = 5.6Hz, 2H), 3.916(s, 3H), 3.759(s, 6H), 3.635(s, 3H), 3.203-3.178(t,  $J$  = 4.8Hz, 4H), 2.812-2.784(t,  $J$  = 5.6Hz, 2H), 2.650-2.625(t,  $J$  = 4.8Hz, 4H);  $^{13}\text{C NMR}$ (100MHz,  $\text{CDCl}_3$ ):  $\delta$  = 169.5, 168.1, 166.1, 165.9, 164.4, 154.5, 146.2, 144.6, 131.0, 124.9, 119.2, 97.1, 86.6, 62.0, 56.5, 53.1, 53.0, 52.3, 51.5, 51.0, 47.0; IR(KBr,  $\text{cm}^{-1}$ ): 3058(w, =C-H), 2950, 2924, 2851(w, C-H), 1741, 1695(s, C=O), 1582(s, C=N), 1511, 1437, 1370(m, Ar), 1275(w,  $\text{CH}_3$ ),

1213, 1160, 1115(m, C-O), 1042, 1022(m, C-N), 794, 743(s, Ar); MS m/z(%): 533(1) (M<sup>+</sup>), 485(2), 377(9), 349(8), 346(17), 318(17), 292(6), 291(31), 286(6), 254(7), 242(12), 241(100), 220(6), 209(18), 205(26), 193(15), 181(25), 151(7), 150(58), 140(11), 106(23), 78(12), 44(17). **HRMS** (ESI) calcd for C<sub>25</sub>H<sub>32</sub>N<sub>3</sub>O<sub>10</sub> [M+H]<sup>+</sup> 534.2088, found 534.2082.

**1-[(E)-1,2-(Dimethoxycarbonyl)ethen-1-yl]-4-{2-[(2-(S)-(E)-1,2-(dimethoxycarbonyl)ethen-1-amino)-3-phenyl-propionoyloxy]ethan-1-yl}piperaine 51a**

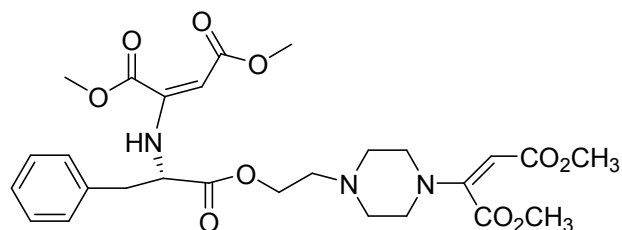

Yield: 55%; light brown sticky clumps,  $[\alpha]_D^{25} = -22.0^\circ$  (C = 0.1, CHCl<sub>3</sub>), <sup>1</sup>H NMR(400MHz, CDCl<sub>3</sub>):  $\delta = 8.433-8.415$ (d, *J* = 7.8Hz, 1H), 7.319-7.207(m, 5H), 5.283 (s, 1H), 4.915-4.860(m, 1H), 4.76(s, 1H), 4.239-4.213(t, *J* = 5.2Hz, 2H), 3.917(s, 3H), 3.721(s, 3H), 3.686(s, 3H), 3.673(s, 3H), 3.149-3.114(m, 5H), 3.051-2.997(m, 1H), 2.610-2.583(t, *J* = 4.8Hz, 2H), 2.507-2.483(t, *J* = 4.8Hz, 4H); <sup>13</sup>C NMR(100MHz, CDCl<sub>3</sub>):  $\delta = 171.8, 170.1, 168.1, 166.1, 163.9, 154.5, 148.7, 136.0, 129.6, 128.7, 127.2, 90.5, 86.5, 62.4, 58.3, 56.2, 53.1, 52.8, 52.1, 51.1, 51.0, 47.0, 40.2$ ; IR(KBr, cm<sup>-1</sup>): 3058, 3029(w, =C-H), 2952(w, C-H), 1739(s, C=O), 1696(s), 1584(m, Ar), 1496(w, CH<sub>3</sub>), 1272, 1217, 1163(m, C-O), 1114, 1041(m, C-N), 979, 736(s, Ar); MS m/z(%): 561(11)(M<sup>+</sup>), 420(9), 419(38), 402(9), 377(3), 262(8), 260(22), 241(31), 239(9), 209(8), 181(13), 170(17), 169(11), 115(11), 113(24), 99(61), 91(20), 70(28), 56(31), 44(100); **HRMS** (ESI) calcd for C<sub>27</sub>H<sub>36</sub>N<sub>3</sub>O<sub>10</sub> [M+H]<sup>+</sup> 562.2401, found 562.2407.

**1-[(E)-1,2(Dimethoxycarbonyl)ethen-1-yl]-4-{2-[N-[(E)-1,2-di(methoxycarbonyl)ethen-1-yl]-]-(S)-pyrrolidine-2-carboxyloxy]eth-1-yl}piperazine 52a**

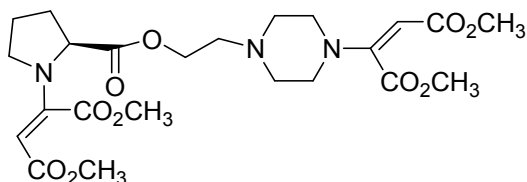

Yield: 78%; light yellow sticky clumps,  $[\alpha]_D^{25} = -68.0^\circ$  (C = 0.1, CHCl<sub>3</sub>), <sup>1</sup>H NMR(400MHz, CDCl<sub>3</sub>):  $\delta = 4.767$  (s, 1H), 4.568(s, 1H), 4.282(t, *J* = 5.6Hz, 2H), 4.138-4.103(m, 1H), 3.908-3.889(2s, 6H), 3.625-3.619(2s, 6H), 3.457-3.352(m, 2H), 3.173-3.149(t, *J* = 4.8Hz, 4H), 2.736-2.724(t, *J* = 5.6Hz, 2H), 2.588-2.581(t, *J* = 4.8Hz, 4H), 2.333-2.232(m, 1H), 2.129-2.064(m, 3H); <sup>13</sup>C NMR(100MHz, CDCl<sub>3</sub>):  $\delta = 171.3, 167.8, 167.5, 165.8, 165.4, 154.3, 151.2, 86.2, 86.0, 61.9, 60.9, 56.1, 52.7, 52.0, 50.7, 50.6, 48.5, 46.7, 30.3, 23.0, 20.8$ ; IR(KBr, cm<sup>-1</sup>): 3058(w, =C-H), 2952, 2883, 2850(w, C-H), 1743, 1694(s, C=O), 1582(s), 1439, 1420(m, Ar), 1375(w, CH<sub>3</sub>), 1345(m), 1272, 1222, 1158 (m, C-O), 1109, 1093, 1043, 1024(m, C-N), 796, 735(s, Ar); MS m/z(%): 511(100)(M<sup>+</sup>), 480(16), 478(4), 420(6), 334(8), 281(10), 255(11), 252(16), 241(35), 239(27), 214(16), 212(32), 181(14), 154(18), 140(11), 85(12), 70(8), 44(37); **HRMS** (ESI) calcd for C<sub>23</sub>H<sub>34</sub>N<sub>3</sub>O<sub>10</sub> [M+H]<sup>+</sup> 512.2244, found 512.2248.
